# Supplementary material for: Apical annuli are specialised sites of post-invasion secretion of dense granules in Toxoplasma
Source: eLife journal article supplement (doi:10.7554/elife.94201), 2024-01-25

**A**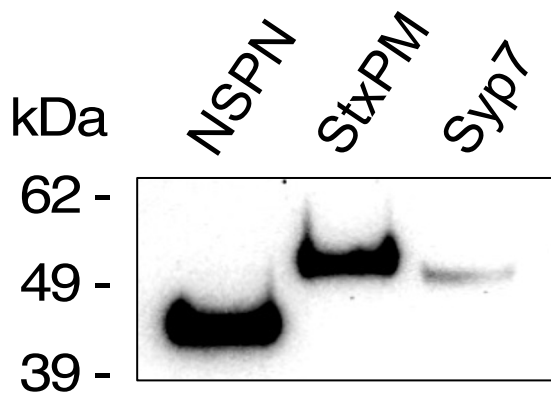**B**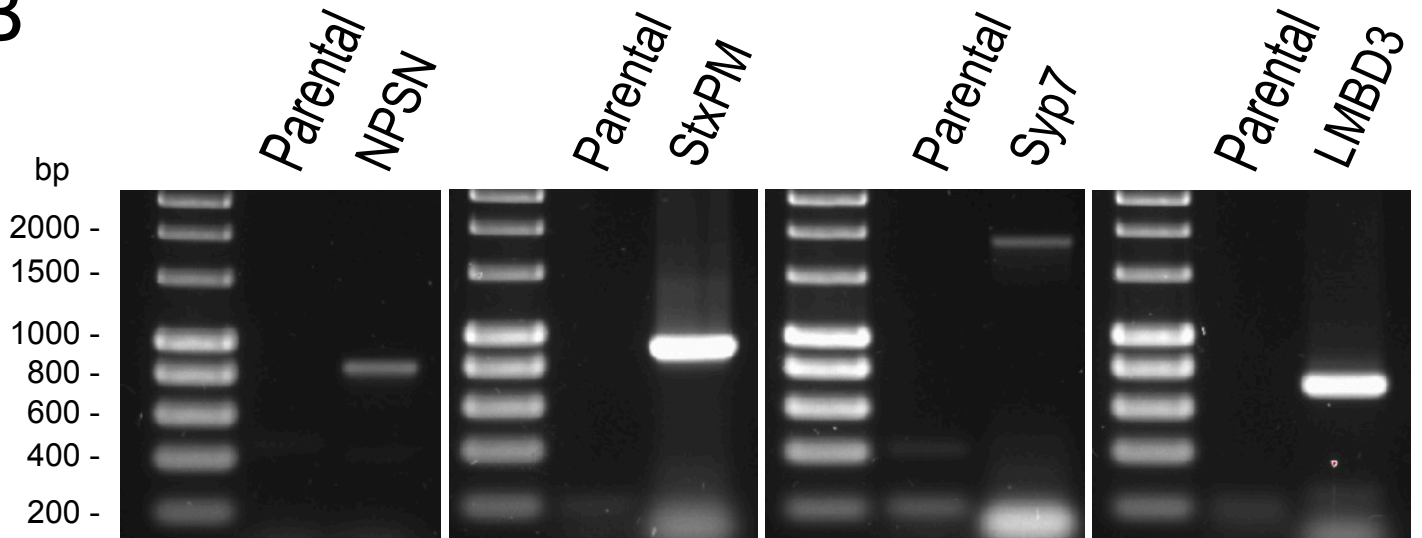

Supplement: supp [file elife-94201-supp-v1.zip]
