# Supplementary material for: Apical annuli are specialised sites of post-invasion secretion of dense granules in Toxoplasma
Source: eLife journal article supplement (doi:10.7554/elife.94201), 2024-01-25
Supplement: supp [file elife-94201-supp-v1.zip]

# Toxo annuli quant prot

Thomas Krueger

2022-07-23

## Abstract

This workflow describes the analysis of differential protein abundance in four different *Toxoplasma gondii* cell lines. Input data to this workflow is the PSM file generated by Proteome Discoverer 3.0, derived from SPS-MS3 analysis of TMT-labeled peptides (2 batches; 16plex each). The workflow covers initial quality analysis of MS data, PSM quality filtering, definition of individual datasets of interest, assessment and removal of missing data, feature aggregation from PSM to protein level, data normalisation across replicates and treatments, power analysis, linear model fitting, and generation of output files and plots with logfold changes and statistical significance for all treatment contrasts of interest.

```
library(tidyverse)
library(scales)
library(cowplot)
library(QFeatures)
library(NormalyzerDE)
library(magrittr)
library(eulerr)
library(FactoMineR)
library(factoextra)
library(limma)
library(ggforce)
library(ggExtra)
library(pwr)
library(esc)
library(Biostrings)
library(writexl)
library(conflicted)

#command preference in case of package conflicts
conflicts_prefer(magrittr::set_names)
conflicts_prefer(dplyr::filter)
conflicts_prefer(matrixStats::colMedians)
conflicts_prefer(dplyr::rename)
conflicts_prefer(matrixStats::rowSds)

#loading psm level data
df_PSM <-
  read_delim(file = "input/P1218_Toxo_Annuli_PSMs.txt",
             delim = "\t",
             na = c("", "NA"),
             col_types = NULL) %>%
  data.frame()
```

```
nm_batches <- c("Batch_1", "Batch_2")
nm_cell_lines <- c("TgLMBD3", "TgNPSN", "TgStxPM", "TgSyp7")
```

```
#list of experiments and contrasts of interest
contrasts <-
  read_csv(file = "input/Toxo_annuli_contrasts.csv",
           col_types = "c") %>%
  as.data.frame()
```

```
contrasts
```

```
##  experiment treat1 treat2
## 1    TgLMBD3    KD control
## 2    TgNPSN    KD control
## 3    TgStxPM    KD control
## 4    TgSyp7    KD control
```

```
#shortening "Abundance" column names to reflect only TMT channel
df_PSM <-
  df_PSM %>%
  rename_with(.,
             ~ gsub(pattern = "Abundance.",
                   replacement = "",
                   x = .))
```

```
#Creating ExpSet ID column since data comes from two separate LCMS batch files
df_PSM$Spectrum.File %>% as.factor() %>% levels
```

```
## [1] "P1218_Toxo_Annuli_Test1.raw" "P1218_Toxo_Annuli_Test2.raw"
```

```
df_PSM$ExpSet <- sub(".raw*", "", df_PSM$Spectrum.File) %>% as.factor()
df_PSM$ExpSet <- recode_factor(df_PSM$ExpSet,
                             P1218_Toxo_Annuli_Test1 = "Batch_1",
                             P1218_Toxo_Annuli_Test2 = "Batch_2")
df_PSM$ExpSet %>% levels()
```

```
## [1] "Batch_1" "Batch_2"
```

```
#PSM quality thresholds
Isol_In <- 75
SN <- 10
SPS_Mass_match <- 70
```

```
#TMT channel order
TMT_order <- c("126", "127N", "127C", "128N",
              "128C", "129N", "129C", "130N",
              "130C", "131N", "131C", "132N",
              "132C", "133N", "133C", "134N")
```

```
#Creating individual PSM datasets for each batch to check on the quality in both runs
ls_Batch_PSM <-
```

```

list(df_PSM %>% filter(ExpSet == "Batch_1"),
     df_PSM %>% filter(ExpSet == "Batch_2")) %>%
set_names(nm_batches)

#overview of PSM quality
graphs_qual <-
  lapply(X = names(ls_Batch_PSM),
        FUN = function(i) {

    #get object
    obj <- ls_Batch_PSM[[i]]

    #time to accumulate precursor ions
    A <-
      ggplot(obj, aes(x = Ion.Inject.Time.in.ms)) +
      geom_histogram(binwidth = 1) +
      theme_bw() +
      xlab("Ion injection time [ms]")

    #precursor ion intensity
    B <-
      ggplot(obj, aes(x = Intensity)) +
      geom_histogram(bins = 100) +
      theme_bw() +
      scale_x_log10(labels = label_log(),
                    breaks = c(10^4, 10^5, 10^6, 10^7, 10^8, 10^9)) +
      xlab("Precursor intensity")

    #mass deviation
    C <-
      ggplot(obj, aes(x = Delta.M.in.ppm)) +
      geom_histogram(binwidth = 1) +
      geom_vline(xintercept = 0) +
      scale_x_continuous(breaks = seq(-10, 10, by = 2)) +
      theme_bw() +
      xlab("Mass deviation [ppm]")

    #mass deviation over retention time
    C1 <-
      ggplot(obj, aes(x = RT.in.min,
                      y = Delta.M.in.ppm)) +
      geom_point(fill = "grey25", alpha = 0.05) +
      xlim(0, 120) +
      geom_hline(yintercept = 0, colour = "red") +
      geom_hline(yintercept = c(-10, 10), colour = "red", linetype = "dashed") +
      theme_bw() +
      xlab("Retention time [min]")+
      ylab("Delta M [ppm]")

    #interference in isolation window
    D <-
      ggplot(obj, aes(x = Isolation.Interference.in.Percent)) +

```

```

geom_histogram(binwidth = 1) +
geom_vline(xintercept = Isol_In,
           linetype = "dashed",
           colour = "red") +
theme_bw() +
xlab("Isolation interference [%]")

#percentage of SPS fragments matched to actual peptide fragments
E <-
ggplot(obj, aes(x = SPS.Mass.Matches.in.Percent)) +
geom_histogram(binwidth = 10) +
geom_vline(xintercept = SPS_Mass_match - 5,
           linetype = "dashed",
           colour = "red") +
scale_x_continuous(breaks = seq(0, 100, by = 10)) +
theme_bw() +
xlab("SPS Mass match [%]")

#signal-to-noise ratio of reporter ions
F1 <-
ggplot(obj, aes(x = Average.Reporter.SN)) +
geom_histogram(binwidth = 0.1) +
geom_vline(xintercept = SN,
           linetype = "dashed",
           colour = "red") +
theme_bw() +
scale_x_log10(labels = label_log()) +
annotation_logticks(sides = "b", base = 10) +
xlab("Average reporter ion S/N ratio")

#average S/N threshold for PSM selection vs signal across channels
G <-
obj %>%
pivot_longer(cols = any_of(TMT_order),
             names_to = "Tag",
             values_to = "Abundance") %>%
mutate(Tag = factor(x = Tag, levels = TMT_order)) %>%
ggplot(aes(x = Tag, y = Abundance)) +
geom_bin2d(bins = 60, drop = TRUE) +
scale_fill_gradient(low = "grey25", high = "white") +
theme_bw() +
theme(axis.text.x = element_text(angle = 90, hjust = 1),
      legend.position = "bottom") +
scale_y_log10(labels = trans_format(trans = "log10",
                                   format = math_format(10.x)),
             breaks = c(0.1, 1, 10, 100, 1000, 10000)) +
geom_hline(yintercept = SN,
           linetype = "dashed",
           colour = "red") +
xlab("Reporter Ion") +
ylab("Abundance [S/N]")

#plot all graphs as grid

```

```

plots <- plot_grid(A, B, C, C1, D, E, F1, G,
                  nrow = 2,
                  ncol = 4,
                  labels = "AUTO")

#add title to each plot
title <-
  ggdraw() +
  draw_label(label = paste(i,
                           "PSMs N =",
                           obj %>% nrow(),
                           sep = " "),
             fontface = 'bold',
             x = 0,
             hjust = 0) +
  theme(plot.margin = margin(0, 0, 0, 7))

graphs_qual <-
  plot_grid(title,
            plots,
            ncol = 1,
            rel_heights = c(0.1, 1))

return(graphs_qual)

}) %>%
set_names(nm_batches)

```

```
## Warning: Removed 3 rows containing non-finite values ('stat_bin()').
```

```
## Warning: Removed 235 rows containing non-finite values ('stat_bin()').
```

```
## Warning: Removed 5600 rows containing non-finite values ('stat_bin2d()').
```

```
## Warning: Removed 2 rows containing non-finite values ('stat_bin()').
```

```
## Warning: Removed 174 rows containing non-finite values ('stat_bin()').
```

```
## Warning: Removed 5304 rows containing non-finite values ('stat_bin2d()').
```

```

#save PSM quality graphs
#pdf(file = "graphs/PSM quality.pdf", width = 16, height = 8)
graphs_qual

```

```
## $Batch_1
```

Batch\_1 PSMs N = 9539

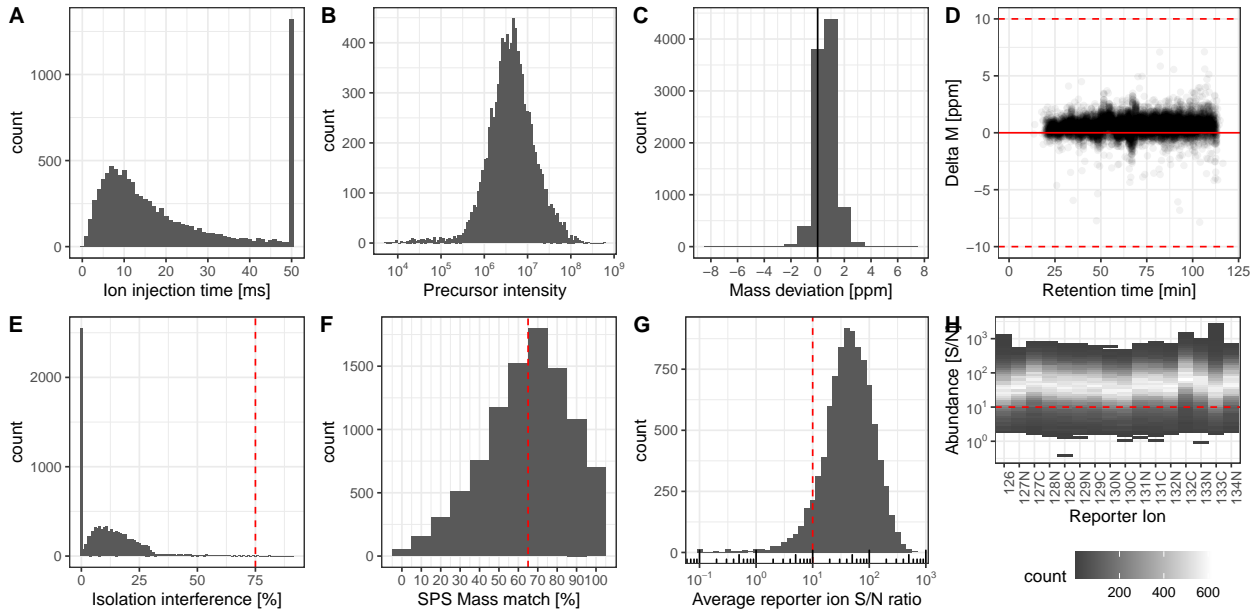

##  
## \$Batch\_2

Batch\_2 PSMs N = 9228

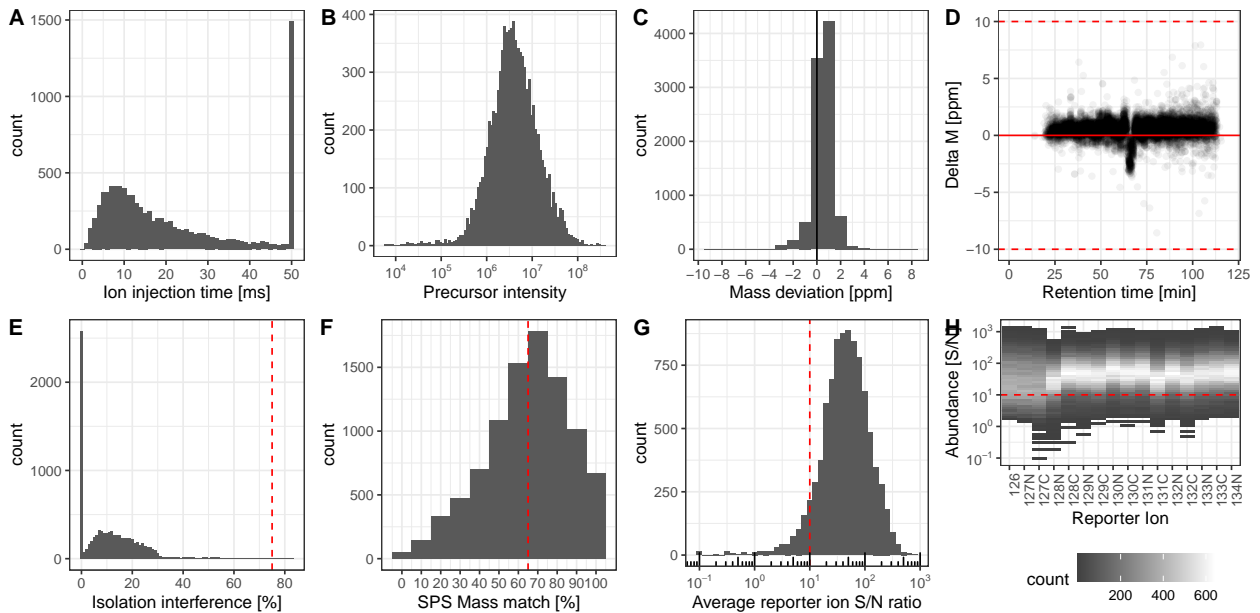

```
#dev.off()

#Sample loading (total intensity) between channels
#pdf(file = "graphs/raw_total_signal.pdf", width = 16)
lapply(X = names(ls_Batch_PSM),
```

```

FUN = function(i) {

  obj <- ls_Batch_PSM[[i]]

  Z <-
  obj %>%
  summarise(across(any_of(TMT_order),
                    ~ sum(.x, na.rm = TRUE))) %>%
  pivot_longer(cols = any_of(TMT_order),
               names_to = "TMT.channel",
               values_to = "total.intensity") %>%
  mutate(TMT.channel = factor(x = TMT.channel,
                              levels = TMT_order))

  plot <-
  ggplot(data = Z, aes(x = TMT.channel,
                       y = total.intensity)) +
  geom_col() +
  theme_bw() +
  xlab("TMT channel") +
  ylab("total reporter ion intensity") +
  labs(title = paste0(i))

  return(plot)
}

```

```
## [[1]]
```

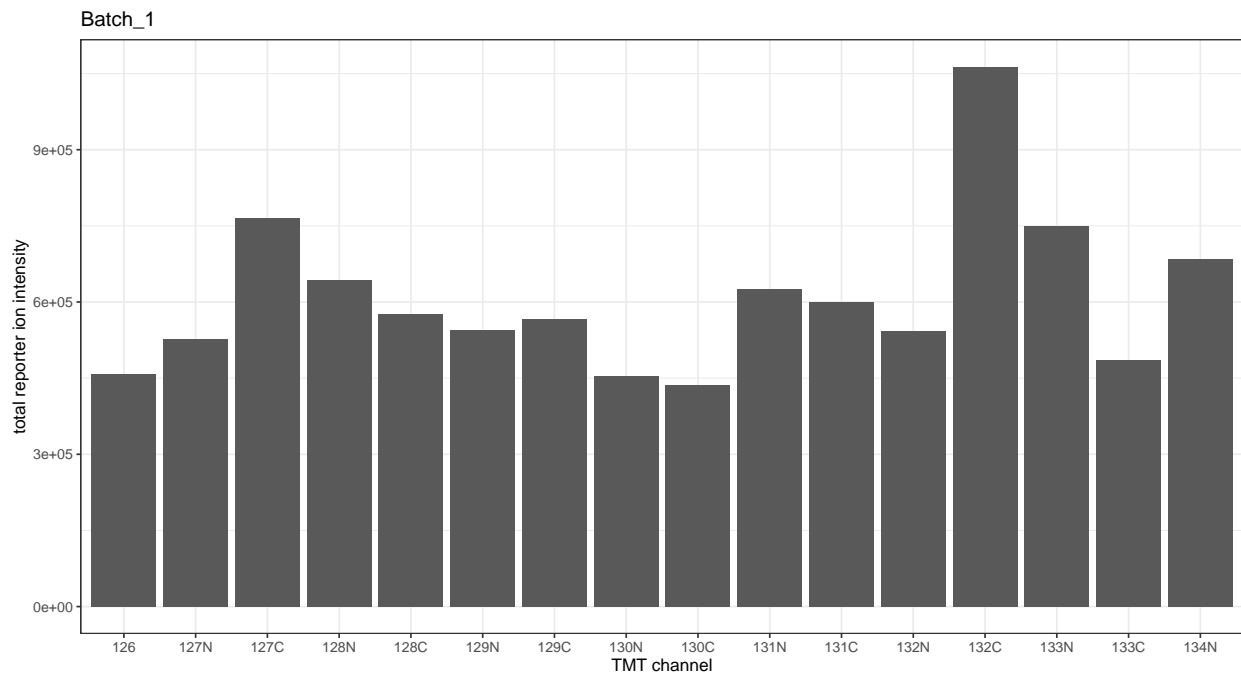

```
##
## [[2]]
```

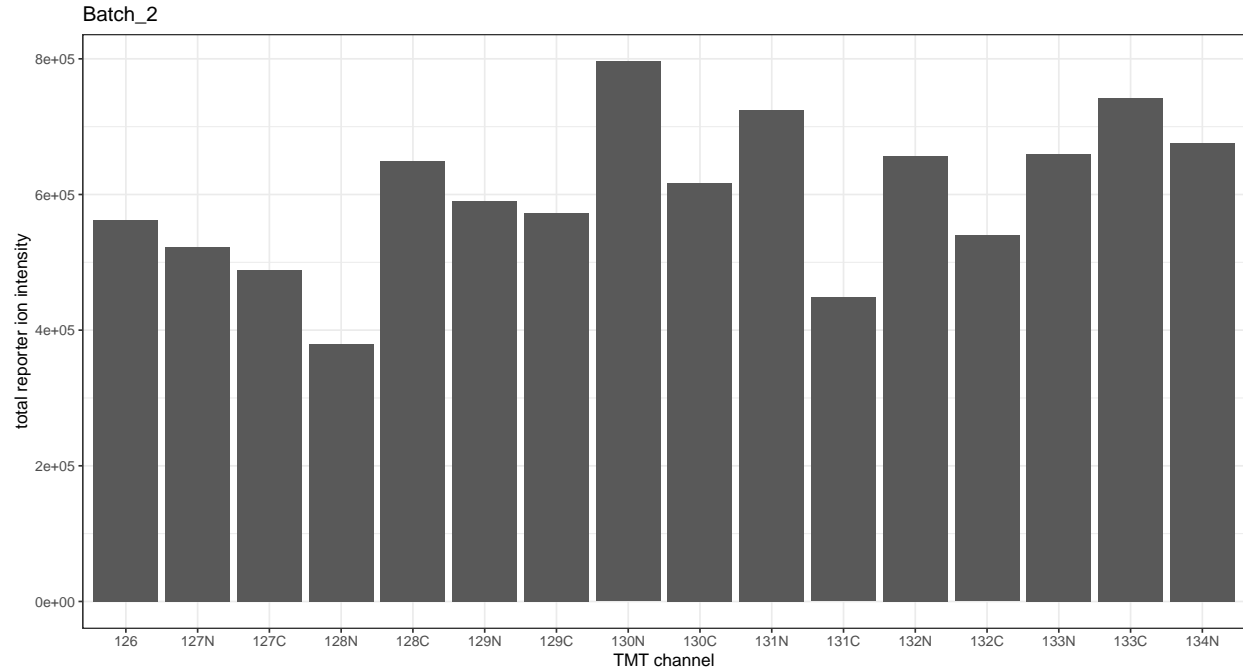

```
#dev.off()
```

```
#overview of PSM assignments to Human and/or Toxoplasma database
```

```
ls_Batch_PSM[["Batch_1"]]$Marked.as %>% table()
```

```
## .
##           Human Human;Toxoplasma      Toxoplasma
##           2973           173           6297
```

```
ls_Batch_PSM[["Batch_2"]]$Marked.as %>% table()
```

```
## .
##           Human Human;Toxoplasma      Toxoplasma
##           4237           146           4743
```

```
#filtering of PSM data
```

```
ls_Batch_PSM_filt <-
```

```
  lapply(X = names(ls_Batch_PSM),
        FUN = function(i) {
```

```
    #get object
```

```
    obj <- ls_Batch_PSM[[i]]
```

```
    #quality filtering
```

```
    obj1 <-
```

```
      obj %>%
```

```
      filter(Master.Protein.Accessions != "") %>%
```

```
      filter(Contaminant == "FALSE") %>%
```

```
      filter(Marked.as == "Toxoplasma") %>%
```



```

filter(PSM.Ambiguity == "Unambiguous" | PSM.Ambiguity == "Selected") %>%
filter(Number.of.Protein.Groups == 1) %>%
filter(is.na(Quan.Info) | Quan.Info != "NoQuanLabels") %>%
filter(Concatenated.Rank == 1) %>%
filter(Isolation.Interference.in.Percent <= Isol_In) %>%
filter(SPS.Mass.Matches.in.Percent >= SPS_Mass_match) %>%
filter(Average.Reporter.SN >= SN)

return(obj1)
}) %>%
set_names(nm_batches)

rm(Isol_In, SPS_Mass_match, SN)

```

*#creating Summarized Experiments for each cell line and adding metadata on replicate ID and condition (*

```

####TgLMBD3
Annuli_TgLMBD3 <-
  readSummarizedExperiment(ls_Batch_PSM_filt[["Batch_1"]],
    ecol = c("126", "127N", "127C",
             "128N", "128C", "129N"),
    name = "psms") %>%
  zeroIsNA()

#sample layout
sample_layout_TgLMBD3 <-
  data.frame(TMT.channel = colnames(Annuli_TgLMBD3 %>% assay()),
    replicate = rep(c("rep1", "rep2", "rep3"), times = 2),
    condition = rep(c("KD", "control"), each = 3)) %>%
  mutate(sample.ID = paste(. $condition,
    . $replicate,
    sep = "_"))

sample_layout_TgLMBD3

```

```

##   TMT.channel replicate condition   sample.ID
## 1         126      rep1         KD     KD_rep1
## 2        127N      rep2         KD     KD_rep2
## 3        127C      rep3         KD     KD_rep3
## 4        128N      rep1   control control_rep1
## 5        128C      rep2   control control_rep2
## 6        129N      rep3   control control_rep3

```

```

#switching TMT channel names for sample IDs
colnames(Annuli_TgLMBD3) <- paste0(sample_layout_TgLMBD3$sample.ID)

#adding metadata to SumExp
Annuli_TgLMBD3$TMT.label <- sample_layout_TgLMBD3$TMT.channel
Annuli_TgLMBD3$condition <- sample_layout_TgLMBD3$condition
Annuli_TgLMBD3$replicate <- sample_layout_TgLMBD3$replicate
Annuli_TgLMBD3$sample.ID <- sample_layout_TgLMBD3$sample.ID

```

```
#metadata in SumExp
colData(Annuli_TgLMBD3)
```

```
## DataFrame with 6 rows and 4 columns
##           TMT.label  condition  replicate  sample.ID
##           <character> <character> <character> <character>
## KD_rep1           126         KD         rep1      KD_rep1
## KD_rep2           127N        KD         rep2      KD_rep2
## KD_rep3           127C        KD         rep3      KD_rep3
## control_rep1      128N        control    rep1      control_re...
## control_rep2      128C        control    rep2      control_re...
## control_rep3      129N        control    rep3      control_re...
```

```
####TgNPSN
```

```
Annuli_TgNPSN <-
  readSummarizedExperiment(ls_Batch_PSM_filt[["Batch_1"]],
    ecol = c("129C", "130N", "130C",
             "131N", "131C", "132N"),
    name = "psms") %>%
  zeroIsNA()

Annuli_TgNPSN$SampleName <- c("TgNPSN_KD1", "TgNPSN_KD2", "TgNPSN_KD3",
                              "TgNPSN_C1", "TgNPSN_C2", "TgNPSN_C3")
Annuli_TgNPSN$Condition <- rep(c("KD", "control"), each = 3)
```

```
#sample layout
```

```
sample_layout_TgNPSN <-
  data.frame(TMT.channel = colnames(Annuli_TgNPSN %>% assay()),
    replicate = rep(c("rep1", "rep2", "rep3"), times = 2),
    condition = rep(c("KD", "control"), each = 3)) %>%
  mutate(sample.ID = paste(. $condition,
    . $replicate,
    sep = "_"))
```

```
sample_layout_TgNPSN
```

```
##   TMT.channel replicate condition  sample.ID
## 1      129C      rep1         KD      KD_rep1
## 2      130N      rep2         KD      KD_rep2
## 3      130C      rep3         KD      KD_rep3
## 4      131N      rep1      control control_rep1
## 5      131C      rep2      control control_rep2
## 6      132N      rep3      control control_rep3
```

```
#switching TMT channel names for sample IDs
```

```
colnames(Annuli_TgNPSN) <- paste0(sample_layout_TgNPSN$sample.ID)
```

```
#adding metadata to SumExp
```

```
Annuli_TgNPSN$TMT.label <- sample_layout_TgNPSN$TMT.channel
Annuli_TgNPSN$condition <- sample_layout_TgNPSN$condition
Annuli_TgNPSN$replicate <- sample_layout_TgNPSN$replicate
Annuli_TgNPSN$sample.ID <- sample_layout_TgNPSN$sample.ID
```

```
#metadata in SumExp
colData(Annuli_TgNPSN)
```

```
## DataFrame with 6 rows and 6 columns
##           SampleName Condition TMT.label condition replicate
##           <character> <character> <character> <character> <character>
## KD_rep1      TgNPSN_KD1         KD      129C         KD      rep1
## KD_rep2      TgNPSN_KD2         KD      130N         KD      rep2
## KD_rep3      TgNPSN_KD3         KD      130C         KD      rep3
## control_rep1 TgNPSN_C1         control 131N         control rep1
## control_rep2 TgNPSN_C2         control 131C         control rep2
## control_rep3 TgNPSN_C3         control 132N         control rep3
##           sample.ID
##           <character>
## KD_rep1      KD_rep1
## KD_rep2      KD_rep2
## KD_rep3      KD_rep3
## control_rep1 control_re...
## control_rep2 control_re...
## control_rep3 control_re...
```

```
####TgStxPM
```

```
Annuli_TgStxPM <-
  readSummarizedExperiment(ls_Batch_PSM_filt[["Batch_2"]],
    ecol = c("126", "127N", "127C",
             "128N", "128C", "129N"),
    name = "psms") %>%
  zeroIsNA()
```

```
#sample layout
```

```
sample_layout_TgStxPM <-
  data.frame(TMT.channel = colnames(Annuli_TgStxPM %>% assay()),
    replicate = rep(c("rep1", "rep2", "rep3"), times = 2),
    condition = rep(c("KD", "control"), each = 3)) %>%
  mutate(sample.ID = paste(.$condition,
    .$replicate,
    sep = "_"))
```

```
sample_layout_TgStxPM
```

```
##   TMT.channel replicate condition sample.ID
## 1      126      rep1      KD      KD_rep1
## 2     127N      rep2      KD      KD_rep2
## 3     127C      rep3      KD      KD_rep3
## 4     128N      rep1 control control_rep1
## 5     128C      rep2 control control_rep2
## 6     129N      rep3 control control_rep3
```

```
#switching TMT channel names for sample IDs
```

```
colnames(Annuli_TgStxPM) <- paste0(sample_layout_TgStxPM$sample.ID)
```

```
Annuli_TgStxPM$TMT.label <- sample_layout_TgStxPM$TMT.channel
```

```
Annuli_TgStxPM$condition <- sample_layout_TgStxPM$condition
Annuli_TgStxPM$replicate <- sample_layout_TgStxPM$replicate
Annuli_TgStxPM$sample.ID <- sample_layout_TgStxPM$sample.ID
```

```
#metadata in SumExp
```

```
colData(Annuli_TgStxPM)
```

```
## DataFrame with 6 rows and 4 columns
##           TMT.label  condition  replicate  sample.ID
##           <character> <character> <character> <character>
## KD_rep1           126         KD         rep1      KD_rep1
## KD_rep2           127N        KD         rep2      KD_rep2
## KD_rep3           127C        KD         rep3      KD_rep3
## control_rep1      128N        control    rep1      control_re...
## control_rep2      128C        control    rep2      control_re...
## control_rep3      129N        control    rep3      control_re...
```

```
####TgSyp7
```

```
Annuli_TgSyp7 <-
  readSummarizedExperiment(ls_Batch_PSM_filt[["Batch_2"]],
    ecol = c("129C", "130N", "130C",
             "132C", "133N", "133C"),
    name = "psms") %>%

  zeroIsNA()

#sample layout
sample_layout_TgSyp7 <-
  data.frame(TMT.channel = colnames(Annuli_TgSyp7 %>% assay()),
    cell.line = "TgSyp7",
    replicate = rep(c("rep1", "rep2", "rep3"), times = 2),
    condition = rep(c("KD", "control"), each = 3)) %>%
  mutate(sample.ID = paste(.$condition,
    .$replicate,
    sep = "_"))
```

```
sample_layout_TgSyp7
```

```
##   TMT.channel cell.line replicate condition  sample.ID
## 1     129C    TgSyp7      rep1         KD    KD_rep1
## 2     130N    TgSyp7      rep2         KD    KD_rep2
## 3     130C    TgSyp7      rep3         KD    KD_rep3
## 4     132C    TgSyp7      rep1    control control_rep1
## 5     133N    TgSyp7      rep2    control control_rep2
## 6     133C    TgSyp7      rep3    control control_rep3
```

```
#switching TMT channel names for sample IDs
```

```
colnames(Annuli_TgSyp7) <- paste0(sample_layout_TgSyp7$sample.ID)
```

```
Annuli_TgSyp7$TMT.label <- sample_layout_TgSyp7$TMT.channel
Annuli_TgSyp7$condition <- sample_layout_TgSyp7$condition
Annuli_TgSyp7$replicate <- sample_layout_TgSyp7$replicate
Annuli_TgSyp7$sample.ID <- sample_layout_TgSyp7$sample.ID
```

```
#metadata in SumExp
colData(Annuli_TgSyp7)
```

```
## DataFrame with 6 rows and 4 columns
##           TMT.label  condition  replicate  sample.ID
##           <character> <character> <character> <character>
## KD_rep1      129C          KD        rep1      KD_rep1
## KD_rep2      130N          KD        rep2      KD_rep2
## KD_rep3      130C          KD        rep3      KD_rep3
## control_rep1  132C          control    rep1 control_re...
## control_rep2  133N          control    rep2 control_re...
## control_rep3  133C          control    rep3 control_re...
```

```
#create a list of the Summarized Experiments
```

```
ls_SumExps <-
  list(Annuli_TgLMBD3,
        Annuli_TgNPSN,
        Annuli_TgStxPM,
        Annuli_TgSyp7) %>%
  set_names(nm_cell_lines)
```

```
rm(sample_layout_TgStxPM, sample_layout_TgNPSN, sample_layout_TgSyp7, sample_layout_TgLMBD3)
```

```
#Overview of how many PSMs have how many missing TMT channels
#pdf(file = "graphs/PSM_MV_pattern.pdf", width = 11, height = 8)
lapply(X = names(ls_SumExps),
  FUN = function(i) {
```

```
  #get object
  obj <- ls_SumExps[[i]]

  #Pattern of missing PSMs per channel
  A <-
    #create dataframe with channel name and percentage of missing values
    data.frame(nNA(obj) %>% .$NAcols %>% .$name,
              nNA(obj) %>% .$NAcols %>% .$pNA) %>%
    setNames(c("channel", "pNA")) %>%
    #plot
    ggplot(aes(x = factor(channel,
                        levels = channel),
              y = pNA)) +
    geom_col() +
    geom_text(aes(label = round(pNA, 3)),
              vjust = -0.2) +
    ggtitle("Proportion of PSMs with missing quantitation", i) +
    xlab("sample ID") +
    ylab("% missing") +
    theme_bw() +
    scale_x_discrete(guide = guide_axis(angle = 45))
```

```
  #How many PSMs have how many missing TMT channels
  B <-
```

```

nNA(obj) %>% .$nNArows %>% .$nNA %>% table() %>% as.data.frame() %>%
mutate(share = round(Freq/nrow(obj) *100, digits = 1)) %>%
set_colnames(c("No.of.missing.channels", "Count", "Freq")) %>%
#plot
ggplot(aes(x = No.of.missing.channels,
           y = Count)) +
geom_col() +
geom_text(aes(label = paste0(Freq, "%")),
          vjust = -0.2) +
ggtitle("PSMs with missing channels [%]",
        paste(i, "total:", obj %>% nrow(), sep = " ")) +
xlab("total number of missing channels") +
ylab("N") +
ylim(0, nrow(obj)) +
theme_bw()

Z <-
plot_grid(A, B,
          nrow = 1,
          ncol = 2,
          labels = "AUTO")
return(Z)
})

```

## [[1]]

**A** Proportion of PSMs with missing quantitation  
TgLMBD3

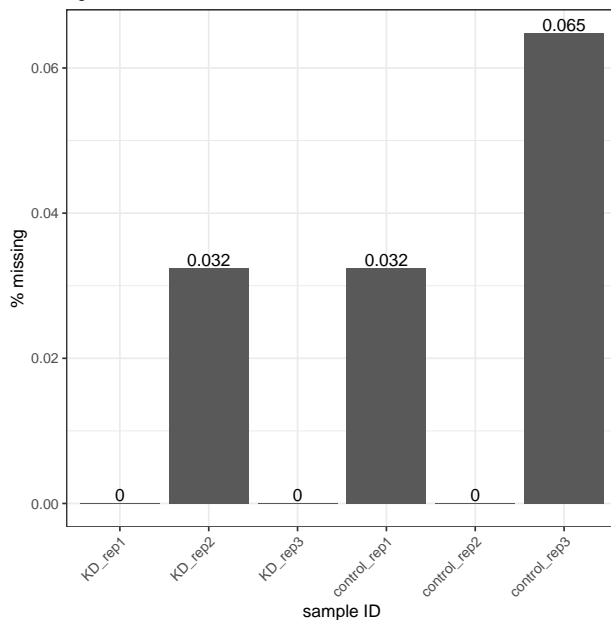

**B** PSMs with missing channels [%]  
TgLMBD3 total: 3087

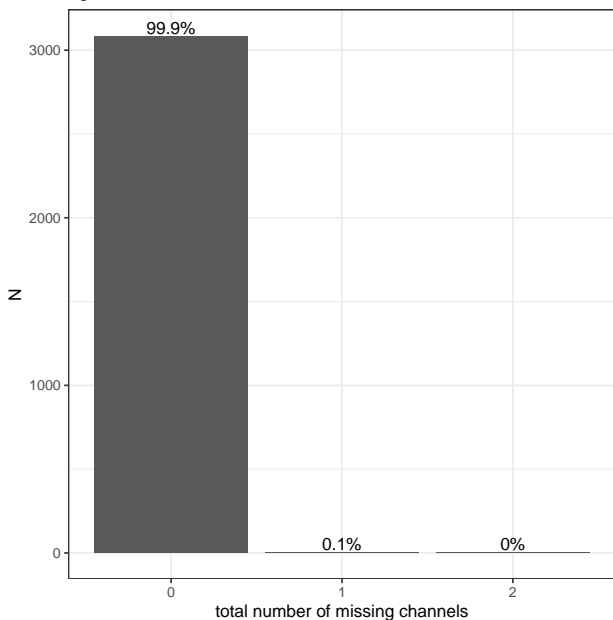

##  
## [[2]]

**A** Proportion of PSMs with missing quantitation  
TgNPSN

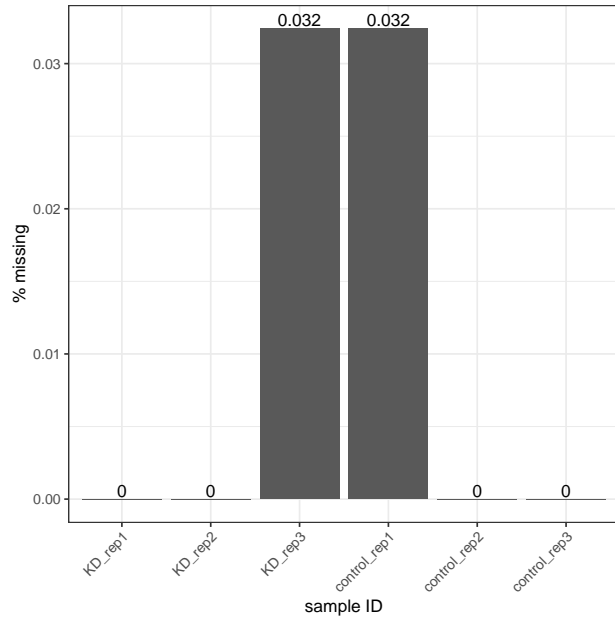

**B** PSMs with missing channels [%]  
TgNPSN total: 3087

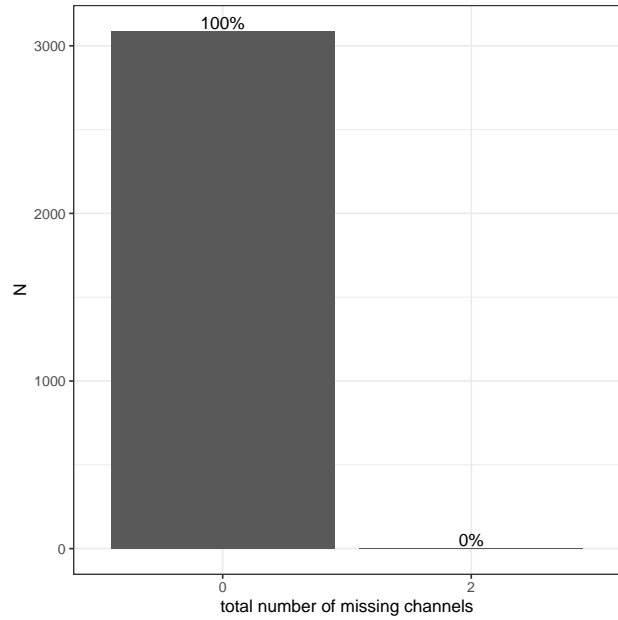

##  
## [[3]]

**A** Proportion of PSMs with missing quantitation  
TgStxPM

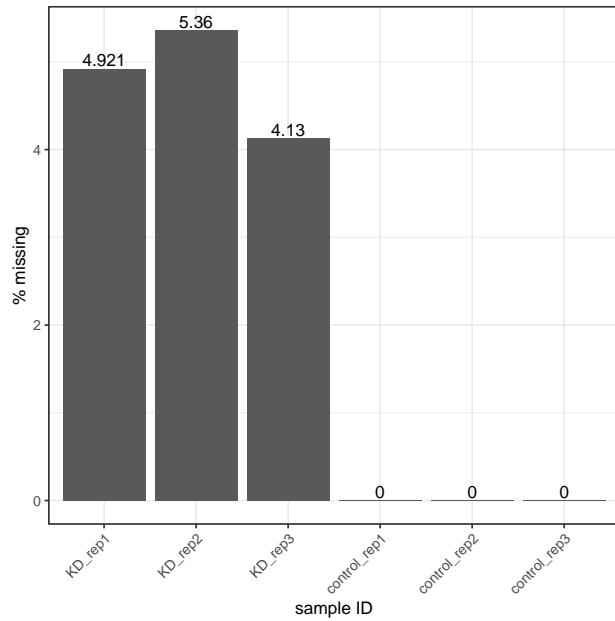

**B** PSMs with missing channels [%]  
TgStxPM total: 2276

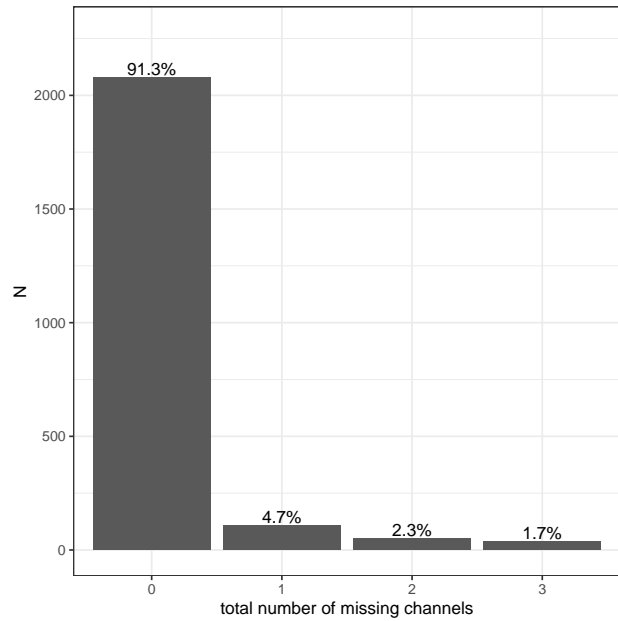

##  
## [[4]]

**A** Proportion of PSMs with missing quantitation  
TgSyp7

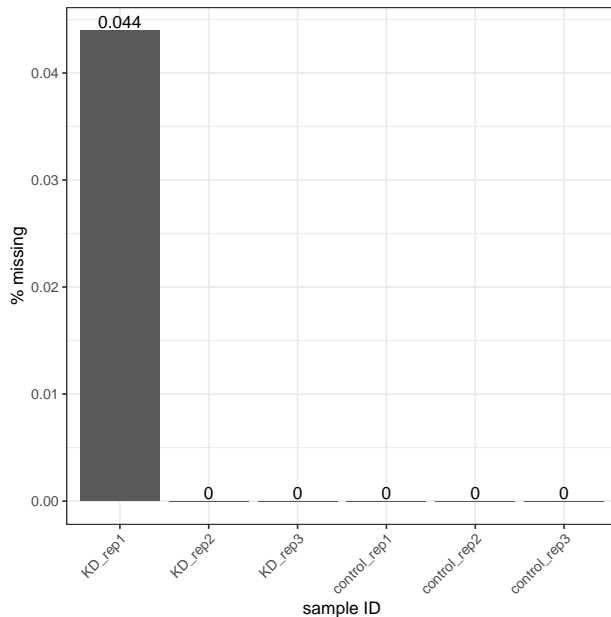

**B** PSMs with missing channels [%]  
TgSyp7 total: 2276

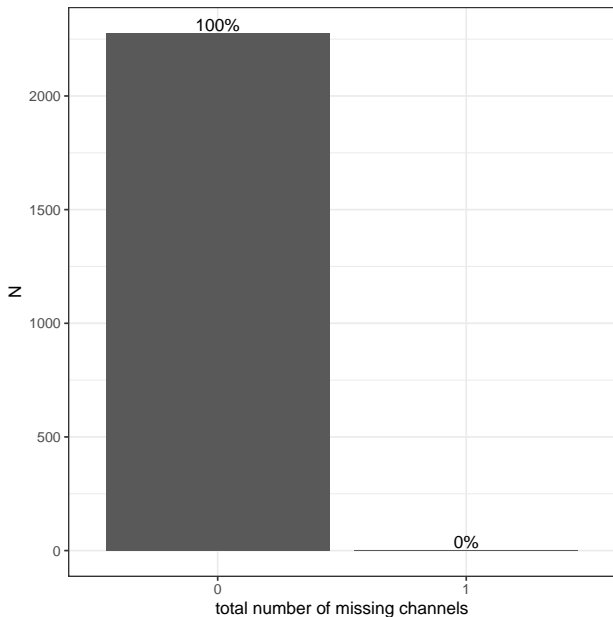

```
#dev.off()

#Reduction of PSM datasets to consider only PSMs with no missing values
ls_SumExps_complete <-
  lapply(X = names(ls_SumExps),
        FUN = function(i) {

    #get object
    obj <- ls_SumExps[[i]]

    #remove PSMs that have missing values
    obj <- filterNA(obj, pNA = 0)

    return(obj)
  }) %>%
  set_names(nm_cell_lines)
```

```
#Aggregation from psm to protein level
ls_QFeat <-
  lapply(X = names(ls_SumExps_complete),
        FUN = function(i) {

    #get object
    obj <- ls_SumExps_complete[[i]]

    #read Summarized Experiment into a QFeatures object
    QFeat <- QFeatures(List(psms = obj))

    #re-add colData
    colData(QFeat) <- colData(obj)
```



```

##log2 transform psm data for robustSummary aggregation
QFeat1 <- logTransform(QFeat,
                      base = 2,
                      i = "psms",
                      name = "log2_psms")

##aggregation psm to peptide using iterated re-weighted least squares (IWLS)
QFeat2 <- aggregateFeatures(object = QFeat1,
                           i = "log2_psms",
                           fcol = "Sequence",
                           name = "log2_peptides",
                           fun = MsCoreUtils::robustSummary)

#aggregation from psm to protein using iterated re-weighted least squares (IWLS)
QFeat3 <- aggregateFeatures(object = QFeat2,
                           i = "log2_peptides",
                           fcol = "Master.Protein.Accessions",
                           name = "log2_proteins",
                           fun = MsCoreUtils::robustSummary)

return(QFeat3)
}) %>%
set_names(nm_cell_lines)

```

```

####removal of low FDR proteins using PD information
ls_QFeat <-
  lapply(X = names(ls_QFeat),
        FUN = function(i) {

    obj <- ls_QFeat[[i]]

    #protein file
    df_prot <-
      read_delim(file = paste0("input/P1218_Toxo_Annuli_Proteins.txt"),
                 delim = "\t",
                 na = c("", "NA"),
                 col_types = NULL)

    #vector of QFeat accessions with high (FDR 1%) and medium (FDR 5%) protein confidence
    vct_confid_accessions <-
      df_prot %>%
      filter(`Protein FDR Confidence Combined` %in% c("High", "Medium")) %>%
      filter(Accession %in% rownames(ls_QFeat[[i]][["log2_proteins"]])) %>%
      .$Accession

    #creating SumExp object containing confident accession numbers
    QFeat_confid <- ls_QFeat[[i]][["log2_proteins"]][vct_confid_accessions]

    #add SumExp with confident proteins to QFeature object
    obj1 <- addAssay(obj,
                    QFeat_confid,
                    name = "log2_proteins_FDR5")

```

```

#add extra assay to fill with untransformed protein values for normalyzer test
obj2 <- addAssay(obj1,
                 obj1[["log2_proteins_FDR5"]],
                 name = "proteins_FDR5")

#replace assay data in "proteins" layer with anti-log2 values
assay(obj2[["proteins_FDR5"]]) <- 2^(assay(obj2[["log2_proteins_FDR5"]]))+1 #+1 to avoid iss

message(paste0("QFeatures structure: ", i))

print(obj2)

return(obj2)
}) %>%
set_names(nm_cell_lines)

```

```

## An instance of class QFeatures containing 6 assays:
## [1] psms: SummarizedExperiment with 3084 rows and 6 columns
## [2] log2_psms: SummarizedExperiment with 3084 rows and 6 columns
## [3] log2_peptides: SummarizedExperiment with 2902 rows and 6 columns
## [4] log2_proteins: SummarizedExperiment with 817 rows and 6 columns
## [5] log2_proteins_FDR5: SummarizedExperiment with 817 rows and 6 columns
## [6] proteins_FDR5: SummarizedExperiment with 817 rows and 6 columns
## An instance of class QFeatures containing 6 assays:
## [1] psms: SummarizedExperiment with 3086 rows and 6 columns
## [2] log2_psms: SummarizedExperiment with 3086 rows and 6 columns
## [3] log2_peptides: SummarizedExperiment with 2903 rows and 6 columns
## [4] log2_proteins: SummarizedExperiment with 817 rows and 6 columns
## [5] log2_proteins_FDR5: SummarizedExperiment with 817 rows and 6 columns
## [6] proteins_FDR5: SummarizedExperiment with 817 rows and 6 columns
## An instance of class QFeatures containing 6 assays:
## [1] psms: SummarizedExperiment with 2078 rows and 6 columns
## [2] log2_psms: SummarizedExperiment with 2078 rows and 6 columns
## [3] log2_peptides: SummarizedExperiment with 1985 rows and 6 columns
## [4] log2_proteins: SummarizedExperiment with 650 rows and 6 columns
## [5] log2_proteins_FDR5: SummarizedExperiment with 650 rows and 6 columns
## [6] proteins_FDR5: SummarizedExperiment with 650 rows and 6 columns
## An instance of class QFeatures containing 6 assays:
## [1] psms: SummarizedExperiment with 2275 rows and 6 columns
## [2] log2_psms: SummarizedExperiment with 2275 rows and 6 columns
## [3] log2_peptides: SummarizedExperiment with 2179 rows and 6 columns
## [4] log2_proteins: SummarizedExperiment with 672 rows and 6 columns
## [5] log2_proteins_FDR5: SummarizedExperiment with 672 rows and 6 columns
## [6] proteins_FDR5: SummarizedExperiment with 672 rows and 6 columns

```

```

#normalyzer test on each dataset to see effect of different normalisation methods
lapply(X = names(ls_QFeat),
       function(i) {

         obj <- ls_QFeat[[i]]

         normalyzer(jobName = paste("normalyzer", i, sep = "_"),
                   experimentObj = obj[["proteins_FDR5"]],

```

```

        sampleColName = "sample.ID",
        groupColName = "condition",
        outputDir = "files")
    })

```

```

## [[1]]
## NULL
##
## [[2]]
## NULL
##
## [[3]]
## NULL
##
## [[4]]
## NULL

```

```

#apply chosen normalization method across all samples
norm_method <- "center.median"

ls_QFeat <-
  lapply(X = names(ls_QFeat),
        FUN = function(i) {

    #get object
    obj <- ls_QFeat[[i]]

    #alignment of global protein abundances across all samples
    QFeat <- normalize(obj,
                      i = "log2_proteins_FDR5",
                      name = "log2_norm_proteins_FDR5",
                      method = norm_method) #center.median normalisation

    return(QFeat)
  }) %>%
  set_names(nm_cell_lines)

#save list of QFeat containers as importable file
saveRDS(object = ls_QFeat,
        file = "files/list_of_Toxo_annuli_QFeatures_datasets.rds")

rm(norm_method)

#Plots of intensity signal across data levels and samples
#pdf(file = "graphs/intensity distribution.pdf", width = 16, height = 8)
invisible(lapply(X = names(ls_QFeat),
                function(i){

    #get object
    obj <- ls_QFeat[[i]]

    #plot

```

```

par(mfrow = c(2, 3), las = 2)
boxplot(assay(obj[["psms"]]),
        main = paste(i, "raw psms", sep = " "),
        ylab = "intensity")
boxplot(assay(obj[["log2_proteins"]]),
        main = paste(i, "log2 proteins", sep = " "),
        ylab = "log2 intensity")
boxplot(assay(obj[["log2_norm_proteins_FDR5"]]),
        main = paste(i, "log2 proteins normalised; FDR 5%", sep = " "),
        ylab = "log2 intensity")
plotDensities(assay(obj[["psms"]]),
              legend = "topright",
              group = obj$condition)
plotDensities(assay(obj[["log2_proteins"]]),
              legend = FALSE,
              group = obj$condition)
plotDensities(object = assay(obj[["log2_norm_proteins_FDR5"]]),
              legend = FALSE,
              group = obj$condition)
})

```

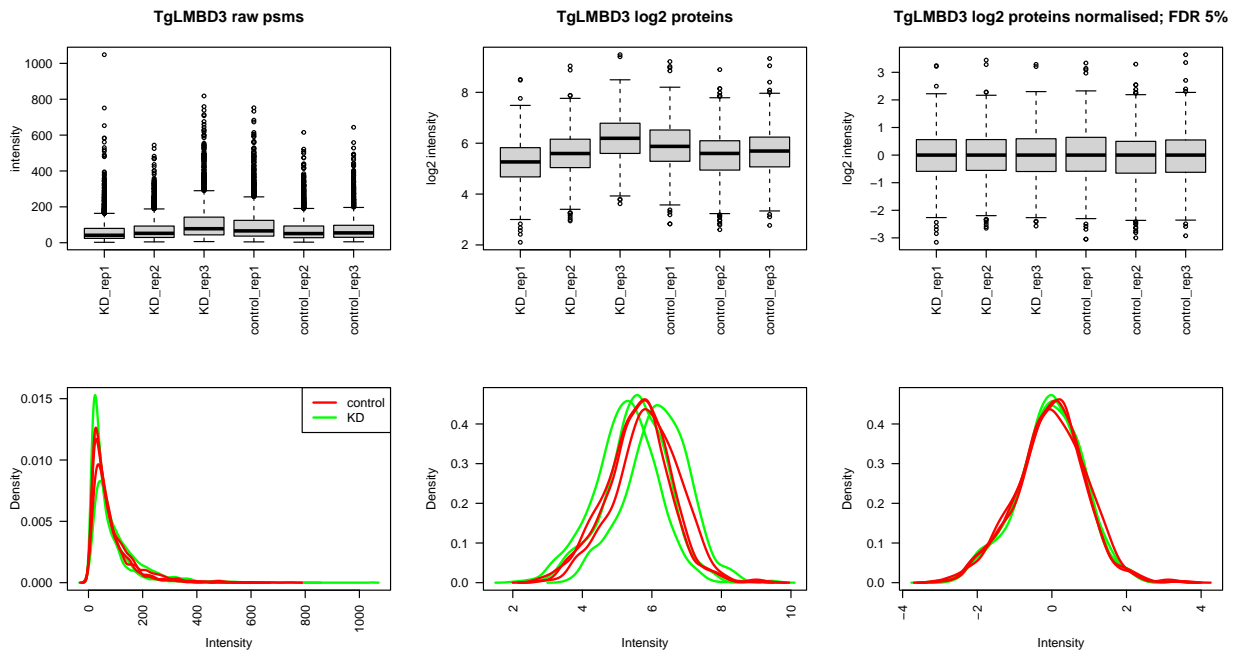

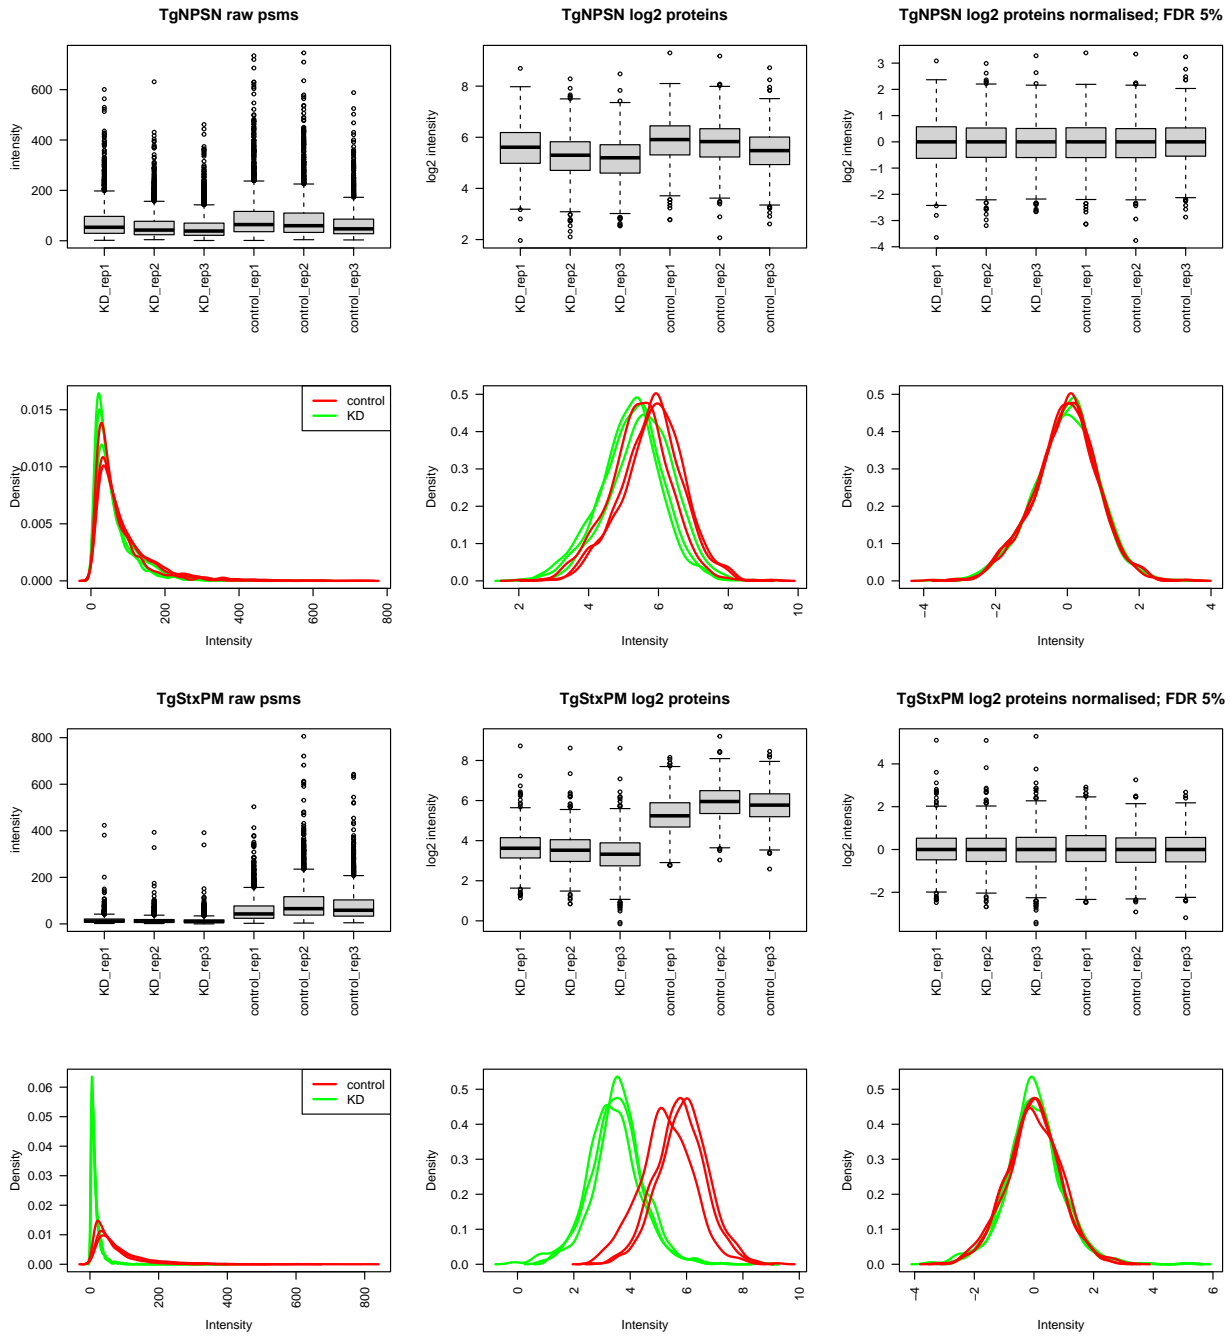

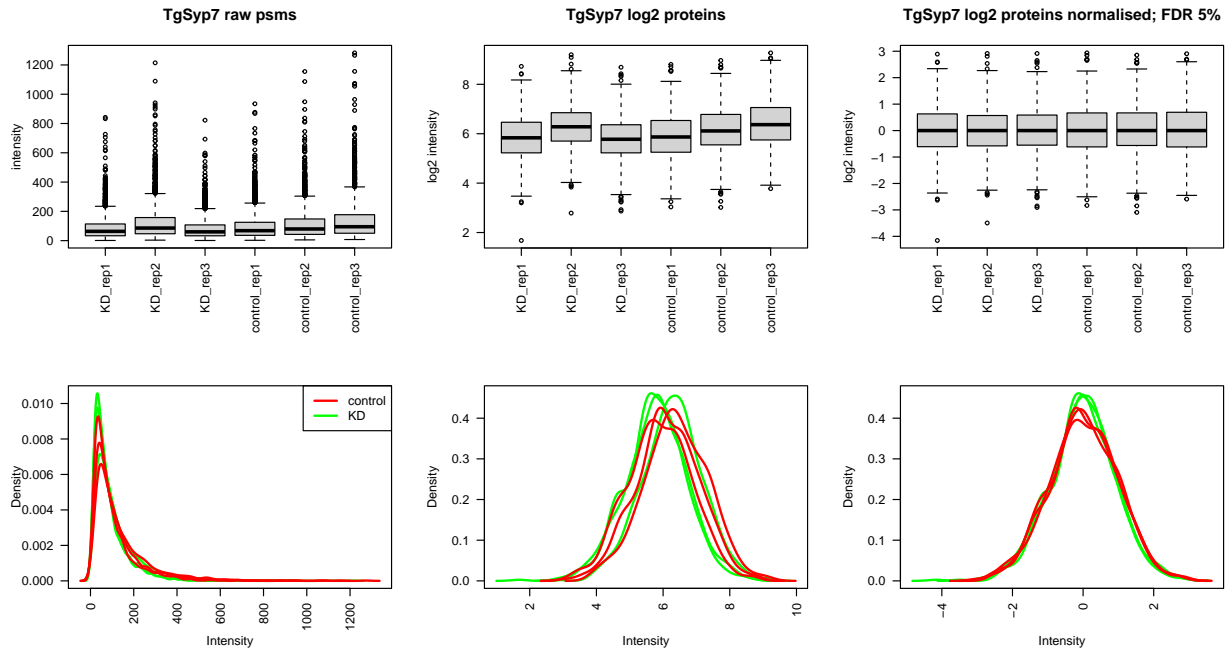

```
#dev.off()
```

```
#save untransformed and log2-transformed, normalized protein intensities to output file
invisible(lapply(X = names(ls_QFeat),
```

```
function(i) {
```

```
  #get raw and transformed log2-normalized protein data
```

```
  obj_raw <- ls_QFeat[[i]][["proteins_FDR5"]]
```

```
  obj_final <- ls_QFeat[[i]][["log2_norm_proteins_FDR5"]]
```

```
  #raw data - combining Master.Protein.Accessions, number of peptides, and assay data
```

```
  obj_raw <-
```

```
    cbind(rowData(ls_QFeat[[i]][["proteins_FDR5"]]) %>%
```

```
      as.data.frame() %>%
```

```
      select(Master.Protein.Accessions, .n) %>%
```

```
      set_colnames(c("Accession", "number.of.peptides")),
```

```
      assay(obj_raw))
```

```
  write_csv(x = obj_raw,
```

```
    file = paste0("files/", i, "_raw_protein_abundances.csv"))
```

```
  obj_final <-
```

```
    cbind(rowData(ls_QFeat[[i]][["log2_norm_proteins_FDR5"]]) %>%
```

```
      as.data.frame() %>%
```

```
      select(Master.Protein.Accessions, .n) %>%
```

```
      set_colnames(c("Accession", "number.of.peptides")),
```

```
      assay(obj_final))
```

```
  write_csv(x = obj_final,
```

```
    file = paste0("files/", i,
```

```
      "_FDR5_log2_median_normalised_protein_abundances.csv"))
```

```
}))
```

```
#list of master protein accession numbers in each set
```

```
Euler_list <-
```

```
list(TgLMBD3 =
```

```
  rowData(ls_QFeat[["TgLMBD3"]][["log2_norm_proteins_FDR5"]])$Master.Protein.Accessions %>%  
  unique(),
```

```
TgNPSN =
```

```
  rowData(ls_QFeat[["TgNPSN"]][["log2_norm_proteins_FDR5"]])$Master.Protein.Accessions %>%  
  unique(),
```

```
TgStxPM =
```

```
  rowData(ls_QFeat[["TgStxPM"]][["log2_norm_proteins_FDR5"]])$Master.Protein.Accessions %>%  
  unique(),
```

```
TgSyp7 =
```

```
  rowData(ls_QFeat[["TgSyp7"]][["log2_norm_proteins_FDR5"]])$Master.Protein.Accessions %>%  
  unique())
```

```
#Euler plot
```

```
#pdf(file = "graphs/Euler_plot_protein_overlap.pdf")
```

```
plot(euler(Euler_list),
```

```
  fill = c("#E69F00", "#009E73", "dodgerblue4"),
```

```
  quantities = TRUE)
```

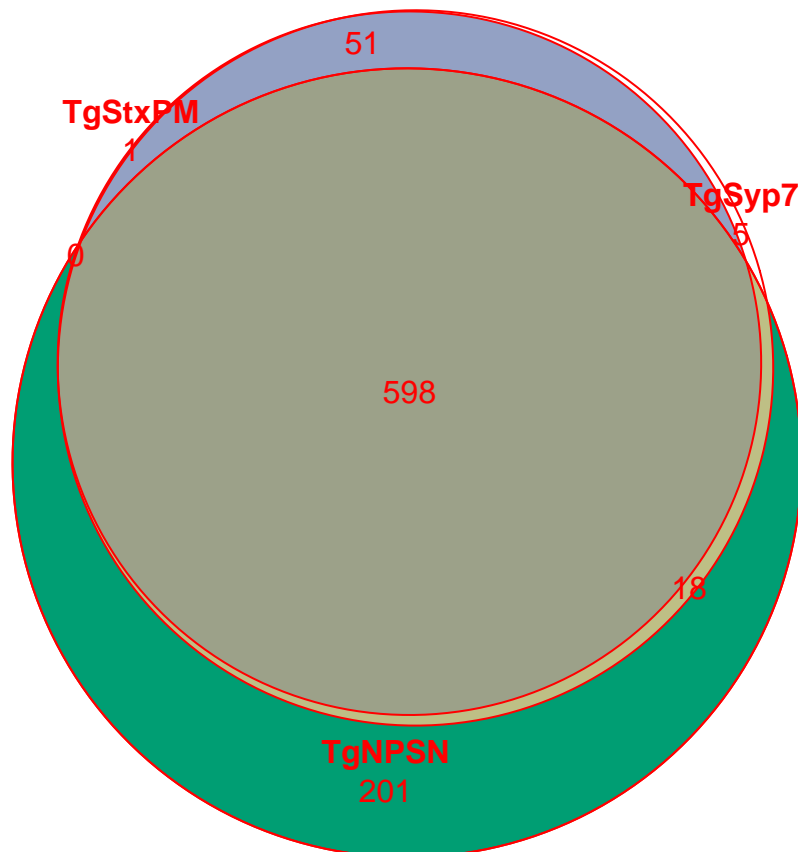

```

#dev.off()

rm(Euler_list)

#Protein PSM support pattern
#pdf(file = "graphs/protein_PSM_support.pdf", width = 11, height = 8)
lapply(X = names(ls_QFeat),
  FUN = function(i) {

    #get object
    obj <- ls_QFeat[[i]][["psms"]]

    #PSM count table for each master protein accession
    PSM_count <-
      obj %>% rowData() %>% .$Master.Protein.Accessions %>%
      table() %>%
      as.data.frame.table

    #summary table listing PSM per protein
    freq_table <-
      PSM_count %>%
      group_by(Freq) %>%
      tally()

    percent_table <-
      freq_table %>%
      #add new column, defining the grouping categories
      mutate(thresh = case_when(Freq <= 5 ~ as.character(Freq),
                                Freq > 5 ~ "6+")) %>%

      group_by(thresh) %>%
      summarise(N = sum(n),
                groups = levels(thresh)) %>%
      mutate(percentage = round((N/sum(N)) *100, digits = 1))

    #plot PSM support per protein
    bar_chart <-
      percent_table %>%
      ggplot(aes(x = thresh,
                 y = N)) +
      geom_col() +
      geom_text(aes(label = N),
                vjust = -0.2) +
      ggtitle(paste("PSM support per protein:",
                    i,
                    "N =",
                    PSM_count$. %>% unique() %>% length(),
                    sep = " ")) +
      xlab("number of PSMs per protein") +
      ylab("N") +
      theme_bw()

    #plot relative proportion of PSM support categories
    pie_chart <-

```



```

percent_table %>%
  ggplot(aes(x = "",
             y = percentage,
             fill = thresh)) +
  geom_col() +
  scale_fill_brewer(palette = "Greys",
                   direction = -1) +
  guides(fill = guide_legend(title = "# of PSMs")) +
  theme_void() +
  geom_text(aes(label = paste0(percentage, "%"),
               colour = "red",
               position = position_stack((vjust = 0.5))) +
  coord_polar(theta = "y",
             start = 0,
             direction = -1)

plot <- plot_grid(bar_chart, pie_chart,
                  nrow = 1,
                  ncol = 2,
                  labels = "AUTO")
return(plot)
})

```

## [[1]]

**A** PSM support per protein: TgLMBD3 N = 817

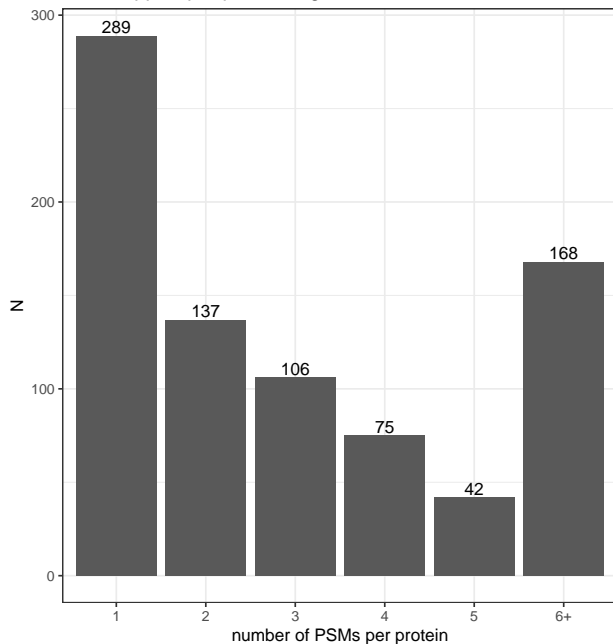

**B**

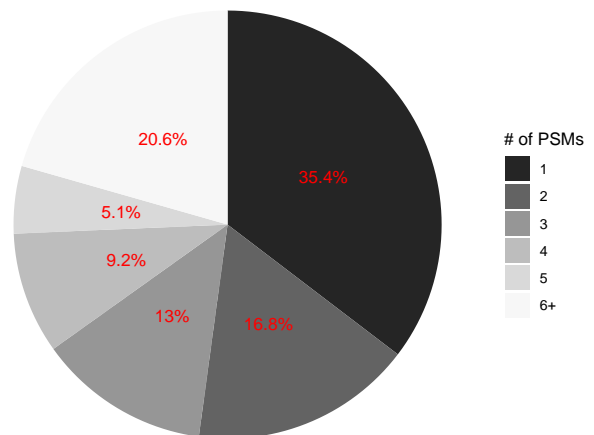

##  
## [[2]]

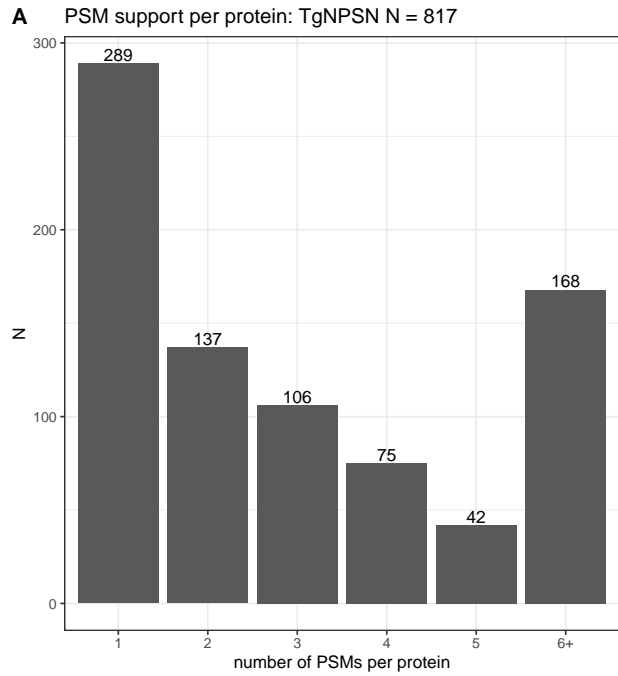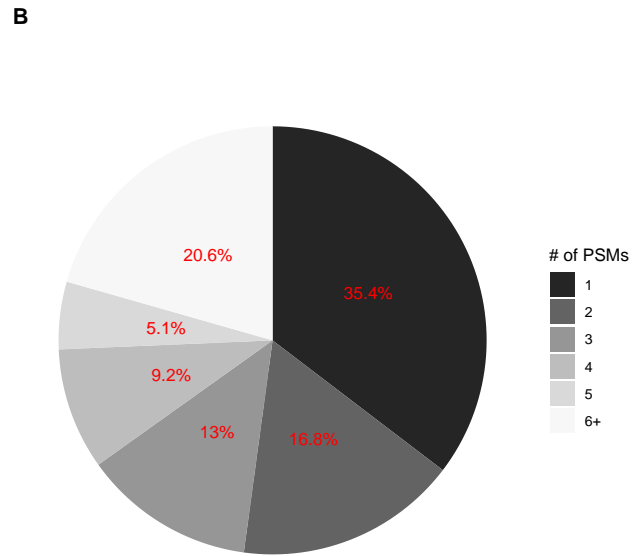

##  
## [[3]]

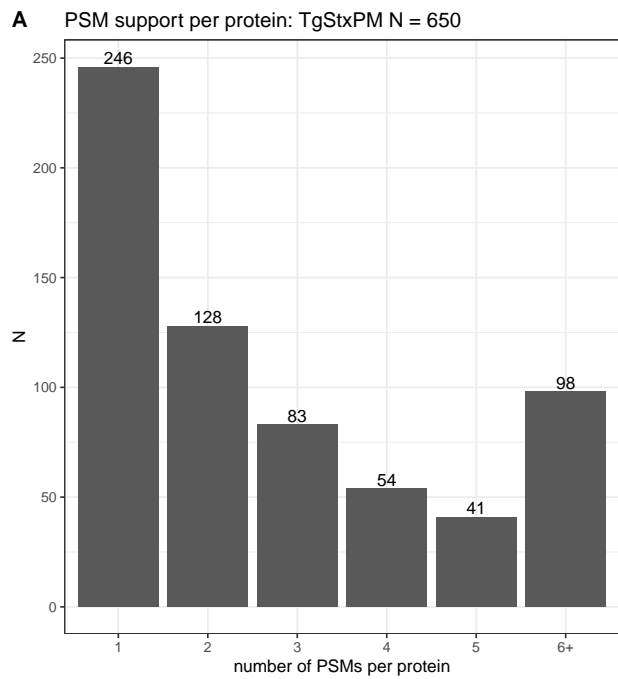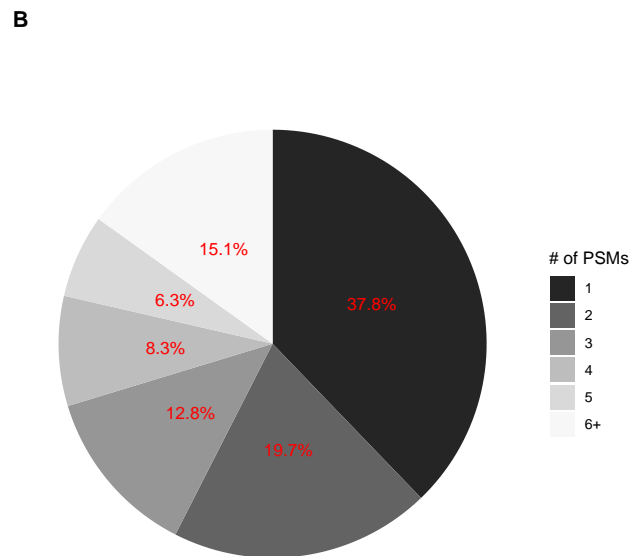

##  
## [[4]]

**A** PSM support per protein: TgSyp7 N = 672

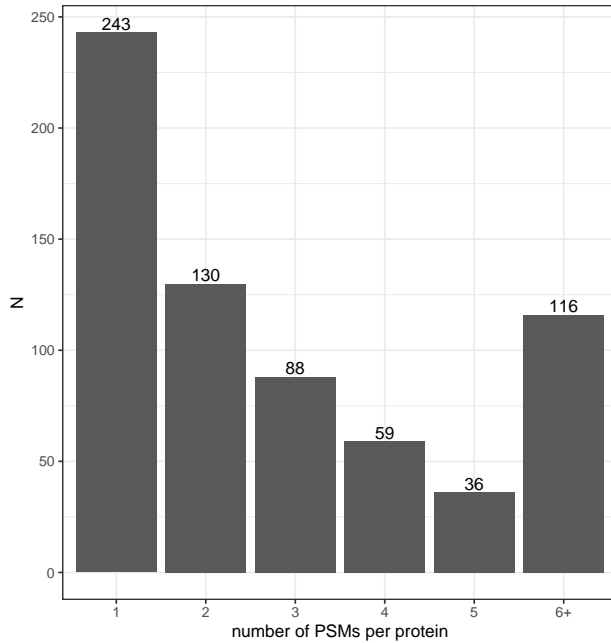

**B**

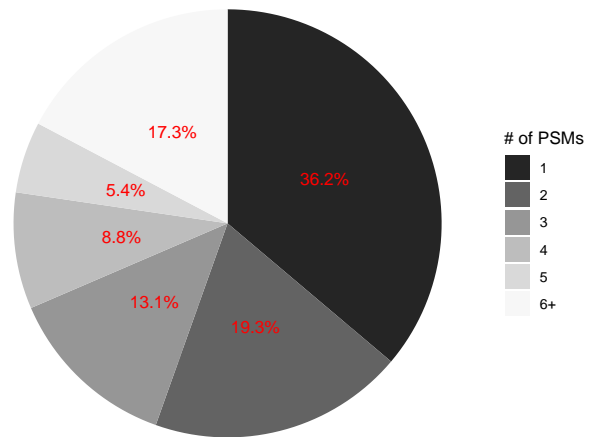

```
#dev.off()
```

```
ls_PCA <-  
  lapply(X = names(ls_QFeat),  
        FUN = function(i) {  
  
    #get object  
    obj <- ls_QFeat[[i]][["log2_norm_proteins_FDR5"]]  
  
    PCA_obj <- PCA(X = assay(obj) %>% t(),  
                  ncp = 10,  
                  scale.unit = TRUE,  
                  graph = FALSE)  
  
    #Scree plot  
    PCA_scree <-  
      fviz_screepLOT(PCA_obj,  
                    choice = "variance",  
                    addlabels = TRUE,  
                    ncp = 8,  
                    main = paste(i, "Scree plot", sep = " "))  
  
    PCA_score_1_2 <-  
      fviz_pca_ind(PCA_obj,  
                  axes = c(1, 2),  
                  geom = c("point", "text"),  
                  habillage = colData(obj)$condition %>% as.factor(),  
                  title = paste(i, "PC1_PC2", sep = " "),  
                  addEllipses = FALSE,  
                  repel = TRUE) +  
  
    theme_bw()  
  }  
}
```

```

PCA_score_1_3 <-
  fviz_pca_ind(PCA_obj,
    axes = c(1, 3),
    geom = c("point", "text"),
    habillage = colData(obj)$condition %>% as.factor(),
    title = paste(i, "PC1_PC3", sep = " "),
    addEllipses = FALSE,
    repel = TRUE) +

  theme_bw()

PCA_score_2_3 <-
  fviz_pca_ind(PCA_obj,
    axes = c(2, 3),
    geom = c("point", "text"),
    habillage = colData(obj)$condition %>% as.factor(),
    title = paste(i, "PC2_PC3", sep = " "),
    addEllipses = FALSE,
    repel = TRUE) +

  theme_bw()

plot <-
  plot_grid(PCA_scee, PCA_score_1_2, PCA_score_1_3, PCA_score_2_3,
    nrow = 2, ncol = 2,
    labels = "AUTO",
    greedy = TRUE)

items <- list(PCA_object = PCA_obj,
  PCA_plots = plot)

  return(items)
}) %>%
set_names(nm_cell_lines)

#save all plots
#pdf(file = "graphs/PCA_plots.pdf", width = 11, height = 8)
for(i in seq(1, length(ls_PCA))) {
  print(ls_PCA[[i]][["PCA_plots"]])
}

```

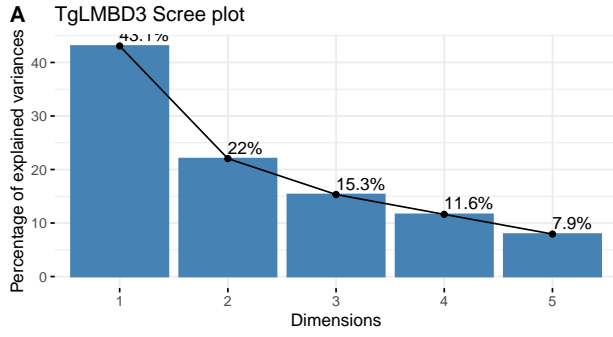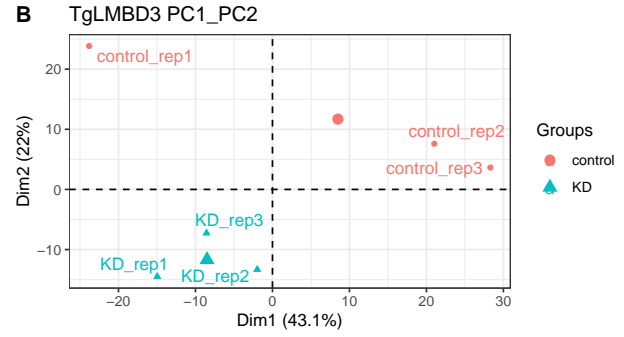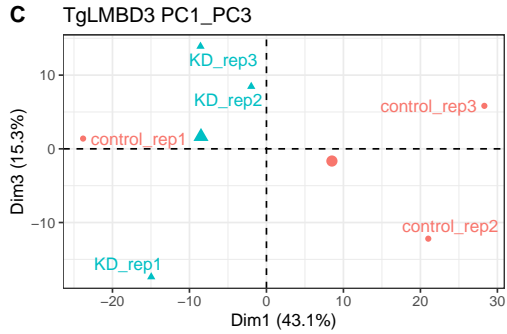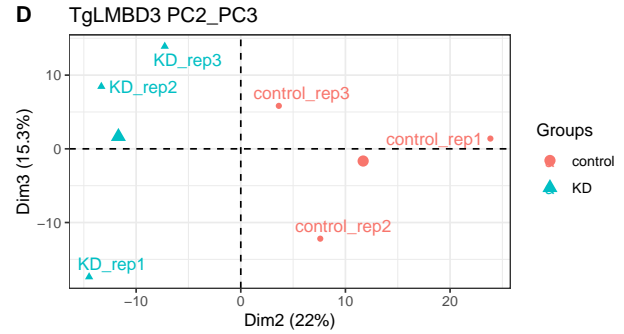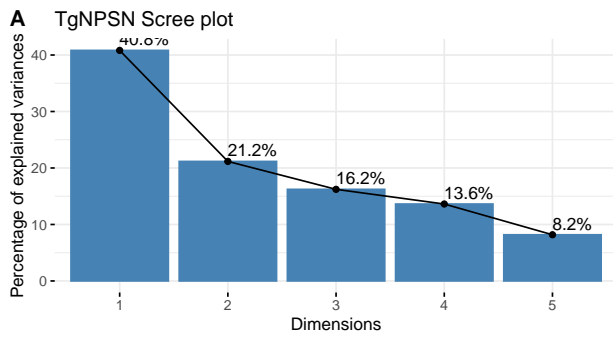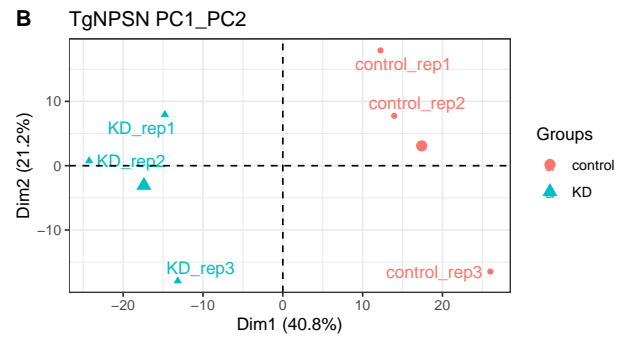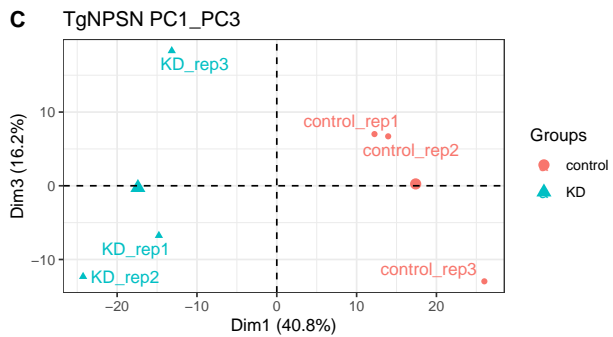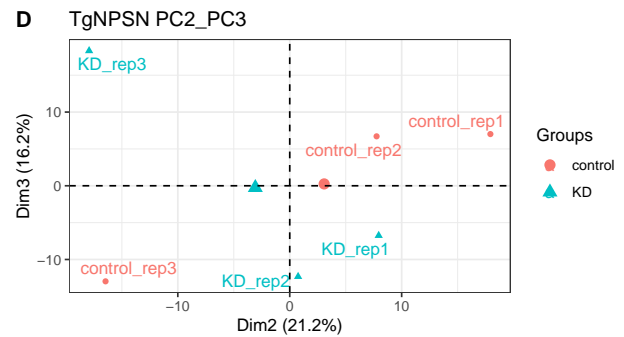

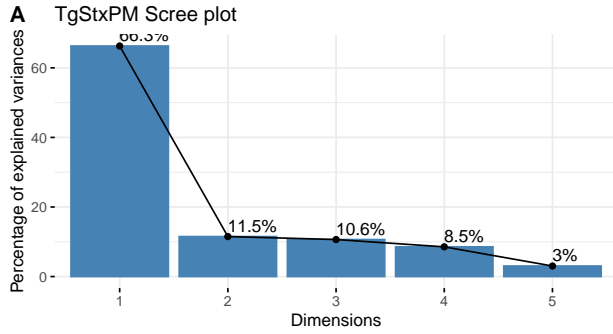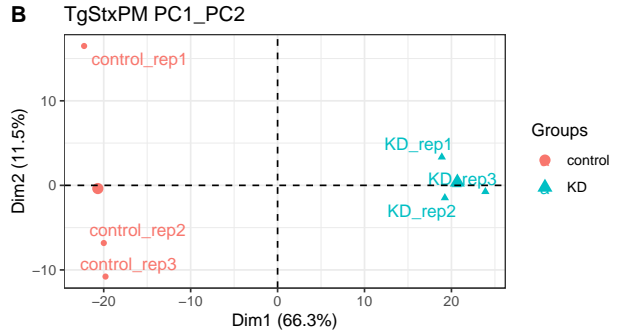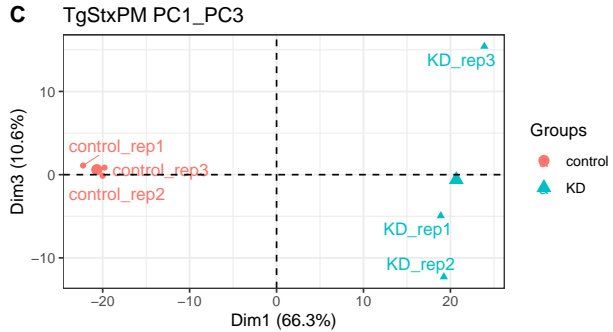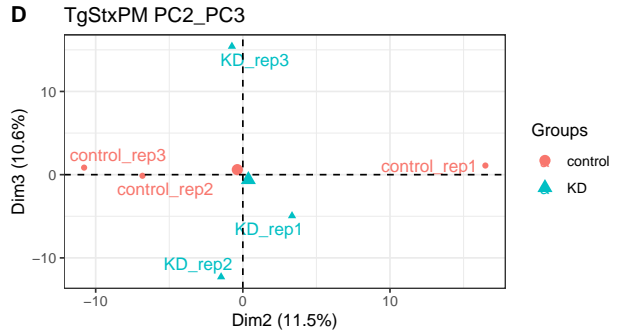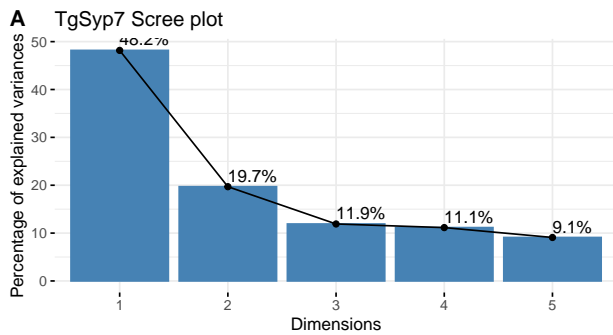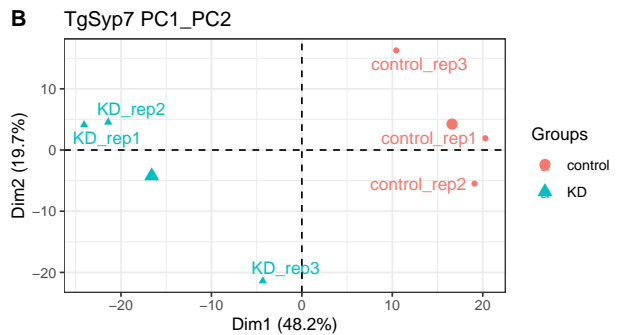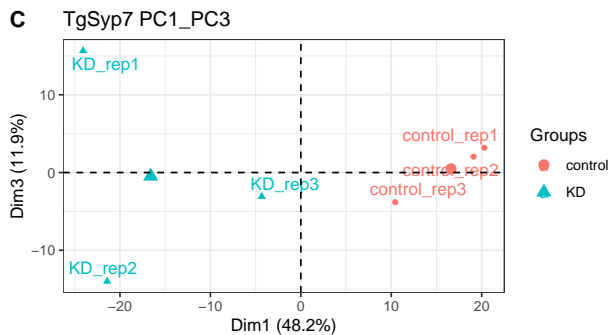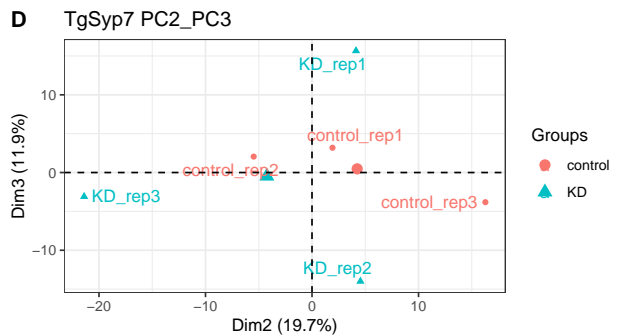

```
#dev.off()
rm(i)
```

```
#custom function, calculating effect size and power; input is Summarized Experiment container (obj) and
fun_power <-
function(experiment, treat1, treat2) {

#select protein layer from defined experiment in the list of QFeature objects
obj <-
ls_QFeat[[experiment]][["log2_norm_proteins_FDR5"]] %>%
```

```

set_colnames(colData(.)$sample.ID)

#treatment IDs
treat_ID <- c(treat1, treat2)

#wide format - each column is one replicate for treatments of interest
df <-
  assay(obj) %>%
  as.data.frame() %>%
  select(starts_with(treat_ID))

#number of replicates per treatment (assuming balanced design)
repl_n <- ncol(df)/length(treat_ID)

#calculating treatment means and SD
for (name in treat_ID) {
  df[, paste0(name, ".mean")] <-
    df %>%
    select(starts_with(name)) %>%
    rowMeans()

  df[, paste0(name, ".SD")] <-
    df %>%
    select(starts_with(name)) %>%
    as.matrix %>%
    rowSds()
}

#function for Cohen's D
CohenD <-
  function(obj, row, ID1, ID2, n) {
    esc_mean_sd(grp1m = obj[row, paste0(ID1, ".mean")],
                grp2m = obj[row, paste0(ID2, ".mean")],
                grp1sd = obj[row, paste0(ID1, ".SD")],
                grp2sd = obj[row, paste0(ID2, ".SD")],
                grp1n = n,
                grp2n = n)
  }

#calculating effect sizes for each entry
for (i in 1:nrow(df)) {
  esc_obj <-
    CohenD(obj = df,
           row = i,
           ID1 = treat1,
           ID2 = treat2,
           n = repl_n)

  #Hedges' g correction for small sample size (effect size becomes 0 for n=3)
  hedge_g <- hedges_g(d = esc_obj$es %>% abs(),
                     totaln = repl_n)
}

```

```

df[i , paste("CohenD", treat1, treat2, sep = ".")] <- esc_obj$es %>% abs()
df[i , paste("HedgeG", treat1, treat2, sep = ".")] <- hedge_g
}

#calculating statistical power based on effect size and N for p = 0.01
for(i in 1:nrow(df)) {
  col <-
  df %>%
  select(starts_with(paste("CohenD", treat1, treat2, sep = "."))) %>%
  colnames()

  pwr <-
  pwr.t.test(n = repl_n,
             d = df[i, col],
             sig.level = 0.01,
             power = NULL,
             type = "two.sample",
             alternative = "two.sided")

  df[i , paste("power", treat1, treat2, sep = ".")] <- pwr$power
}

#column for peptide support
pep_support <-
obj %>% rowData() %>% as.data.frame() %>%
select(.n) %>%
set_colnames(value = "n.peptides") %>%
rownames_to_column(var = "Accession")

#joining peptide support and all calculated data
df1 <-
left_join(x = pep_support,
          y = df %>% rownames_to_column(var = "Accession"),
          by = "Accession")

df1$Accession <-
str_remove(string = df1$Accession,
           pattern = "-t26_1-p1")

return(df1)
}

#applying power function across all contrasts of interest across all experiments
ls_power_dfs <-
apply(X = contrasts, MARGIN = 1, FUN = function(x) {

  fun_power(experiment = x["experiment"],
            treat1 = x["treat1"],
            treat2 = x["treat2"])
}) %>%
set_names(nm_cell_lines)

```



```

power_plots <-
  lapply(X = names(ls_power_dfs),
        FUN = function(i) {

    obj <- ls_power_dfs[[i]]

    Cohen <- colnames(obj %>% select(starts_with("CohenD")))
    power <- colnames(obj %>% select(starts_with("power")))

    A <-
      ggplot(data = obj, aes(.data[[Cohen]])) +
      geom_histogram(closed = "right") +
      stat_bin(geom = "text", aes(label = after_stat(count),
                                vjust = -0.5)) +

      theme_bw() +
      ggtitle("effect size (Cohen's D uncorrected)") +
      xlab("difference between treatment means \ndivided by pooled SD")

    B <-
      ggplot(data = obj, aes(.data[[power]])) +
      geom_histogram(binwidth = 0.1, closed = "right") +
      stat_bin(binwidth = 0.1,
              center = 0,
              geom = "text", aes(label = after_stat(count),
                                vjust = -0.5)) +

      scale_x_continuous(breaks = seq(0, 1, 0.2)) +
      theme_bw() +
      ggtitle("statistical power at p = 0.01") +
      xlab("probability that test correctly \nrejects null hypothesis")

    C <-
      ggplot(obj, aes(x = .data[[Cohen]],
                    y = .data[[power]])) +
      geom_point() +
      geom_hline(yintercept = 0.8,
                linetype = "dashed",
                colour = "red") +

      theme_bw() +
      xlab("effect size") +
      ylab("power")

    D <-
      ggMarginal(C, type = "histogram", binwidth = 0.1, size = 10)

    plots <-
      plot_grid(A, B, D,
                ncol = 3,
                labels = "AUTO")

    #add title to each plot
    title <-
      ggdraw() +

```

```

draw_label(label = i,
           fontface = 'bold',
           x = 0,
           hjust = 0) +
theme(plot.margin = margin(0, 0, 0, 7))

graphs_power <-
  plot_grid(title,
            plots,
            ncol = 1,
            rel_heights = c(0.1, 1))

return(graphs_power)

}) %>%
set_names(nm_cell_lines)

#pdf(file = "graphs/power_plots.pdf", width = 16)
power_plots

```

## \$TgLMBD3

### TgLMBD3

**A** effect size (Cohen's D uncorrected)

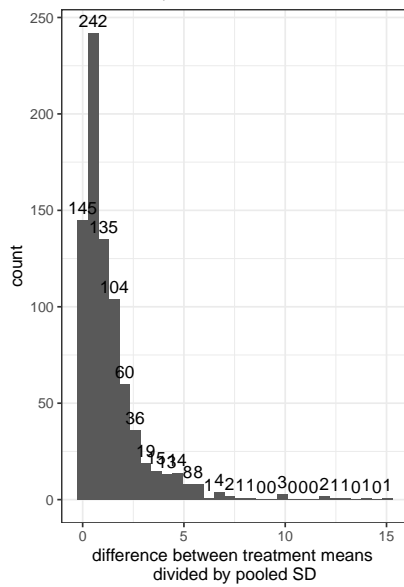

**B** statistical power at p = 0.01

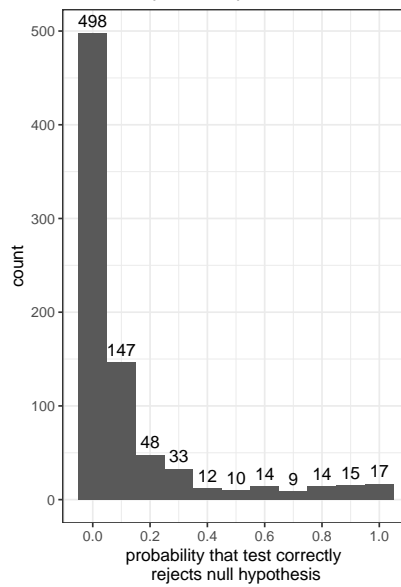

**C**

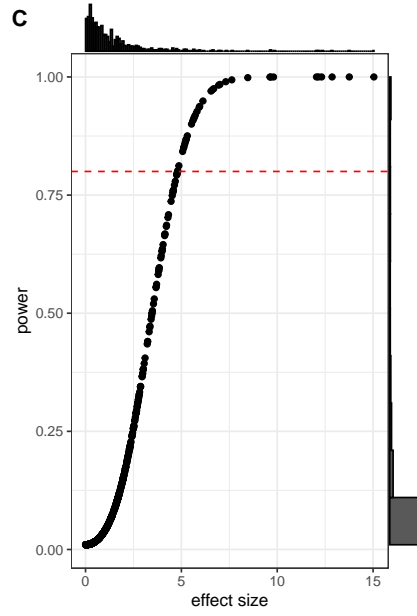

##

## \$TgNPSN

**TgNPSN**

**A** effect size (Cohen's D uncorrected)

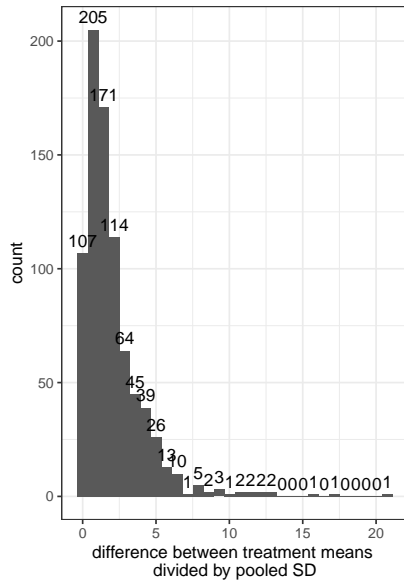

**B** statistical power at  $p = 0.01$

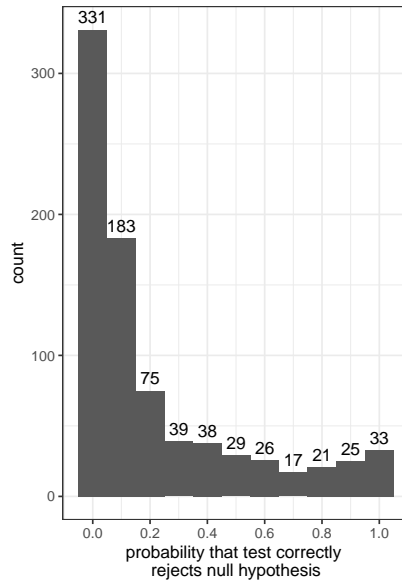

**C**

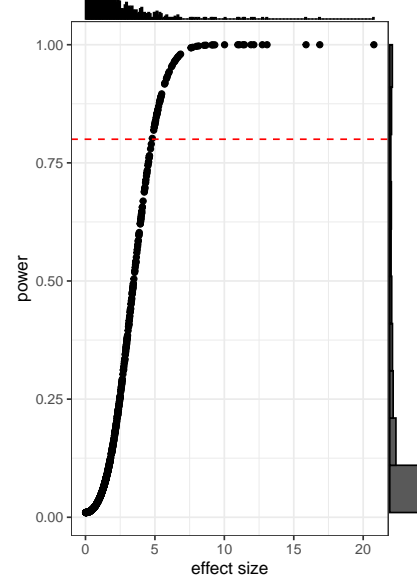

##

## \$TgStxPM

**TgStxPM**

**A** effect size (Cohen's D uncorrected)

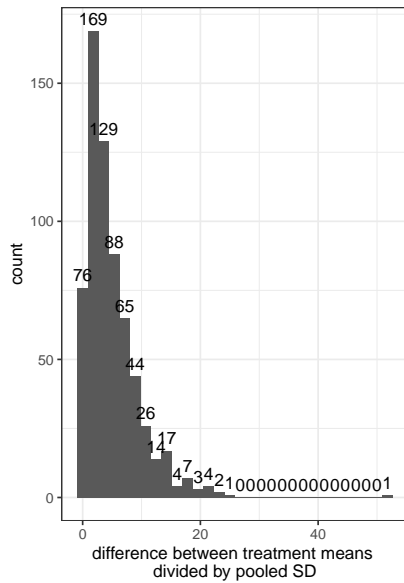

**B** statistical power at  $p = 0.01$

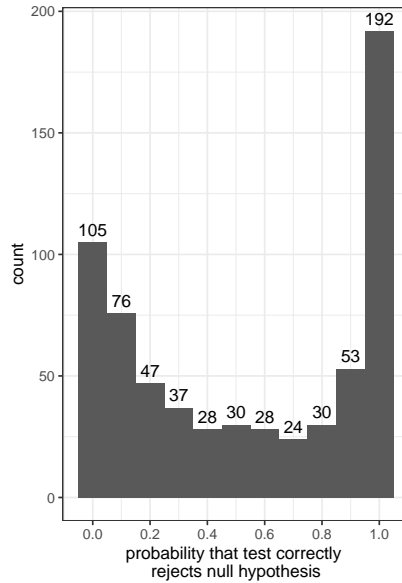

**C**

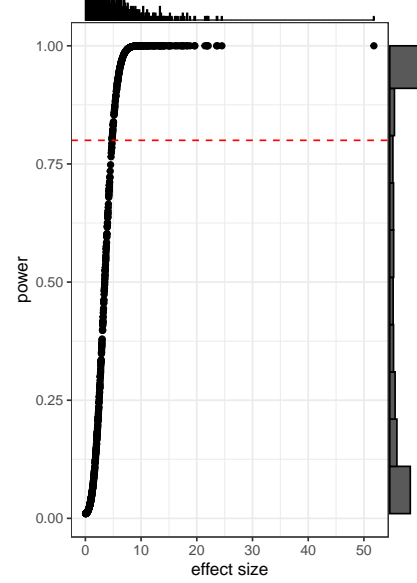

##

## \$TgSyp7

## TgSyp7

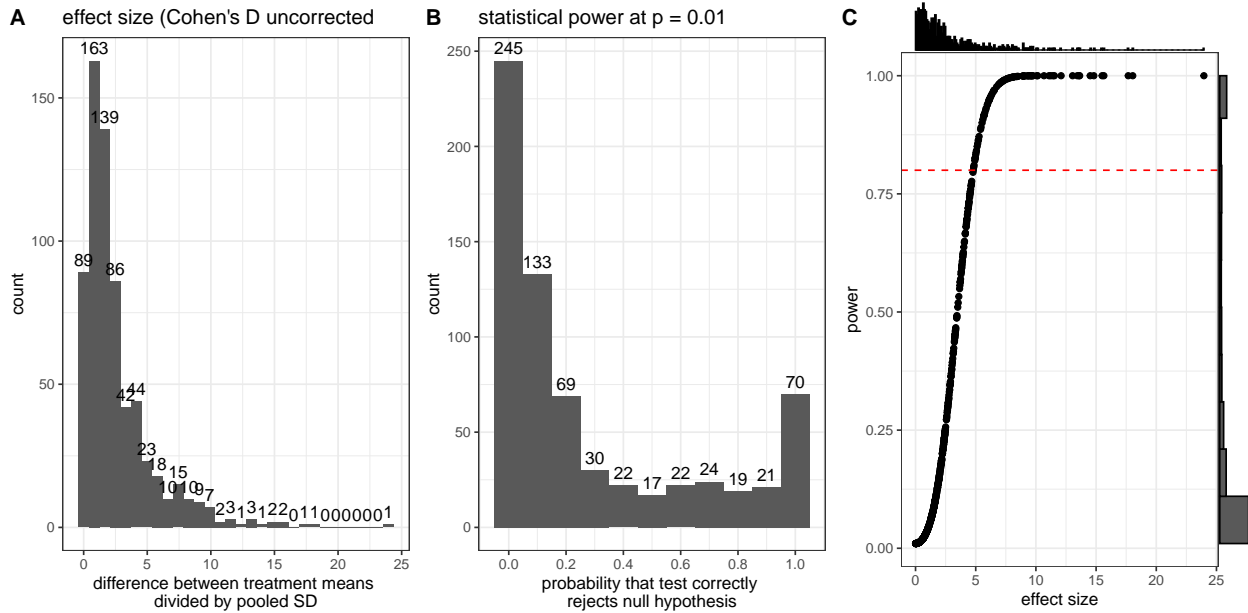

```
#dev.off()
```

```
ls_fit_Bayes_models <-
  lapply(X = names(ls_QFeat),
        FUN = function(i) {

    #get object
    obj <- ls_QFeat[[i]]

    #Data
    data <- obj[["log2_norm_proteins_FDR5"]] %>% assay()

    #Create model matrix
    treatment <- factor(colData(obj)$condition)
    model_design <- model.matrix(~ 0 + treatment) #a means model

    message("model design:")
    print(i)
    print(model_design)

    #define contrasts of interest
    model_contrasts <-
      makeContrasts(KD_control = treatmentKD-treatmentcontrol,
                    levels = colnames(model_design))

    message("model contrasts:")
    print(i)
    print(model_contrasts)

    #perform linear model fit
    fitted_model <- lmFit(object = data,
```

```

        design = model_design)

    #Apply contrasts
    fitted_model <- contrasts.fit(fit = fitted_model,
                                contrasts = model_contrasts)

    #Calculate test statistic using Bayes moderation of the standard errors towards a global value
    fit_Bayes <- eBayes(fitted_model,
                        trend = TRUE,
                        robust = TRUE)

    #Plot residual standard deviation vs average log abundance
    fit_Bayes %>% plotSA(xlab = "Average log2_abundance", cex = 0.5)

    return(fit_Bayes)

  }) %>%
  set_names(nm_cell_lines)

```

```
## model design:
```

```
## [1] "TgLMBD3"
##   treatmentcontrol treatmentKD
## 1                0           1
## 2                0           1
## 3                0           1
## 4                1           0
## 5                1           0
## 6                1           0
## attr("assign")
## [1] 1 1
## attr("contrasts")
## attr("contrasts")$treatment
## [1] "contr.treatment"
```

```
## model contrasts:
```

```
## [1] "TgLMBD3"
##           Contrasts
## Levels      KD_control
## treatmentcontrol      -1
## treatmentKD           1
```

```
## model design:
```

```
## [1] "TgNPSN"
##   treatmentcontrol treatmentKD
## 1                0           1
## 2                0           1
## 3                0           1
## 4                1           0
## 5                1           0
```

```
## 6          1          0
## attr("assign")
## [1] 1 1
## attr("contrasts")
## attr("contrasts")$treatment
## [1] "contr.treatment"

## model contrasts:
```

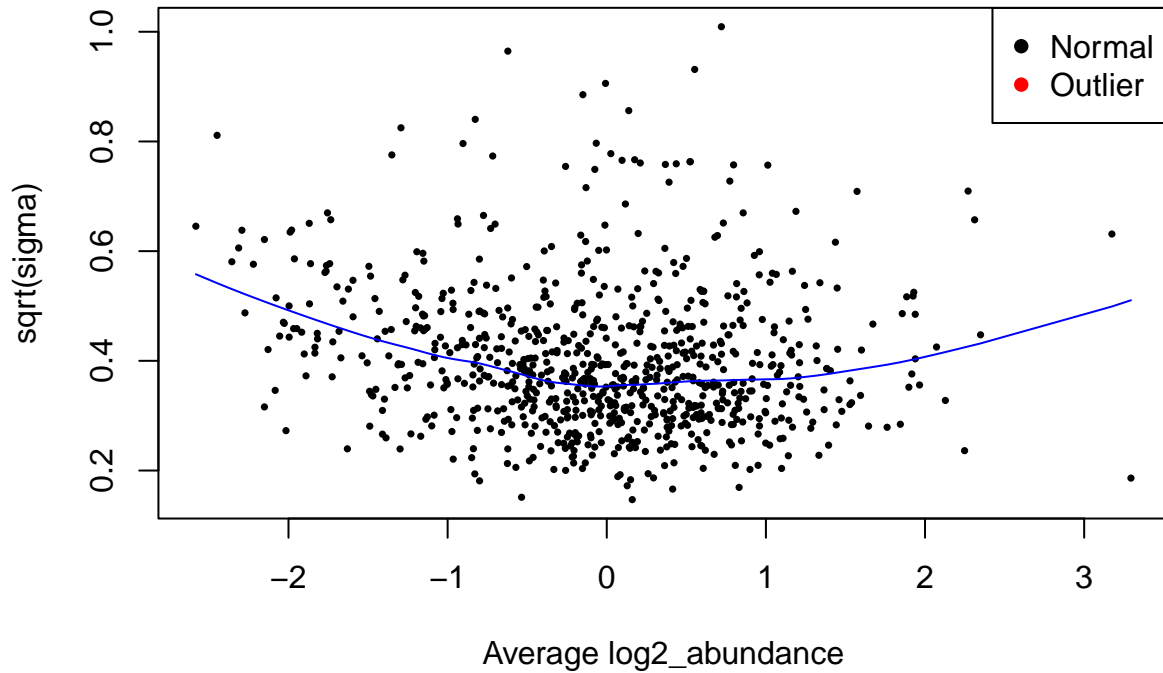

```
## [1] "TgNPSN"
##           Contrasts
## Levels      KD_control
## treatmentcontrol      -1
## treatmentKD           1

## model design:

## [1] "TgStxPM"
## treatmentcontrol treatmentKD
## 1          0          1
## 2          0          1
## 3          0          1
## 4          1          0
## 5          1          0
## 6          1          0
```

```
## attr("assign")
## [1] 1 1
## attr("contrasts")
## attr("contrasts")$treatment
## [1] "contr.treatment"
```

```
## model contrasts:
```

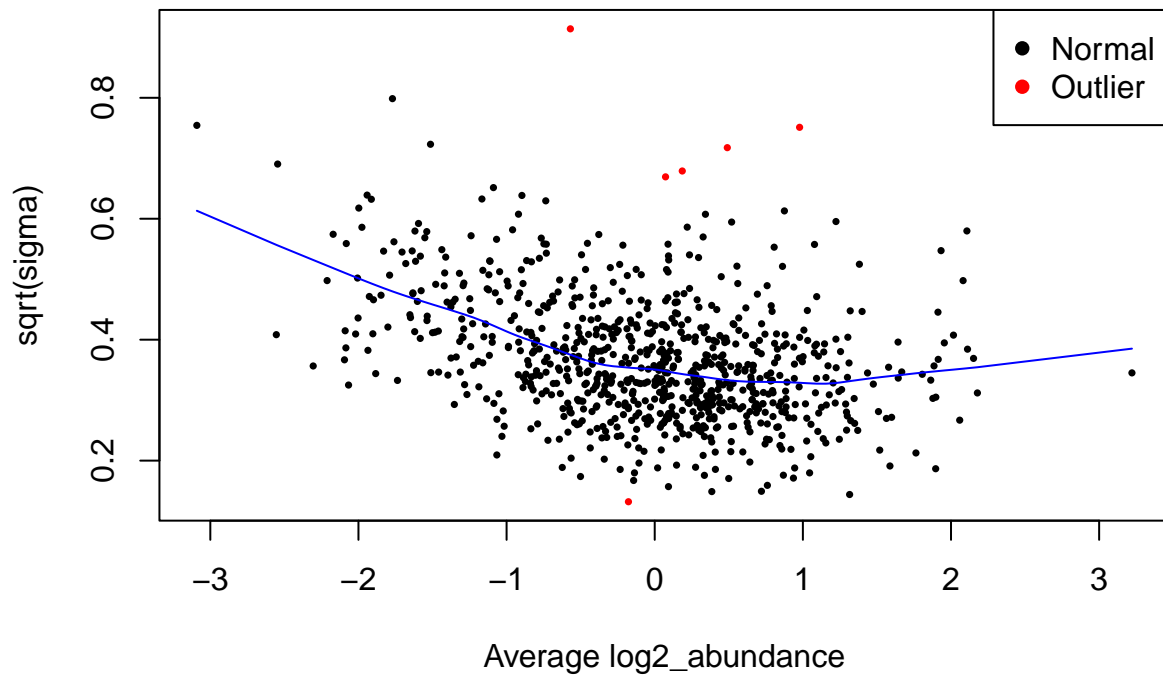

```
## [1] "TgStxPM"
##           Contrasts
## Levels   KD_control
## treatmentcontrol -1
## treatmentKD      1
```

```
## model design:
```

```
## [1] "TgSyp7"
## treatmentcontrol treatmentKD
## 1                0          1
## 2                0          1
## 3                0          1
## 4                1          0
## 5                1          0
## 6                1          0
## attr("assign")
```

```
## [1] 1 1
## attr(,"contrasts")
## attr(,"contrasts")$treatment
## [1] "contr.treatment"
```

```
## model contrasts:
```

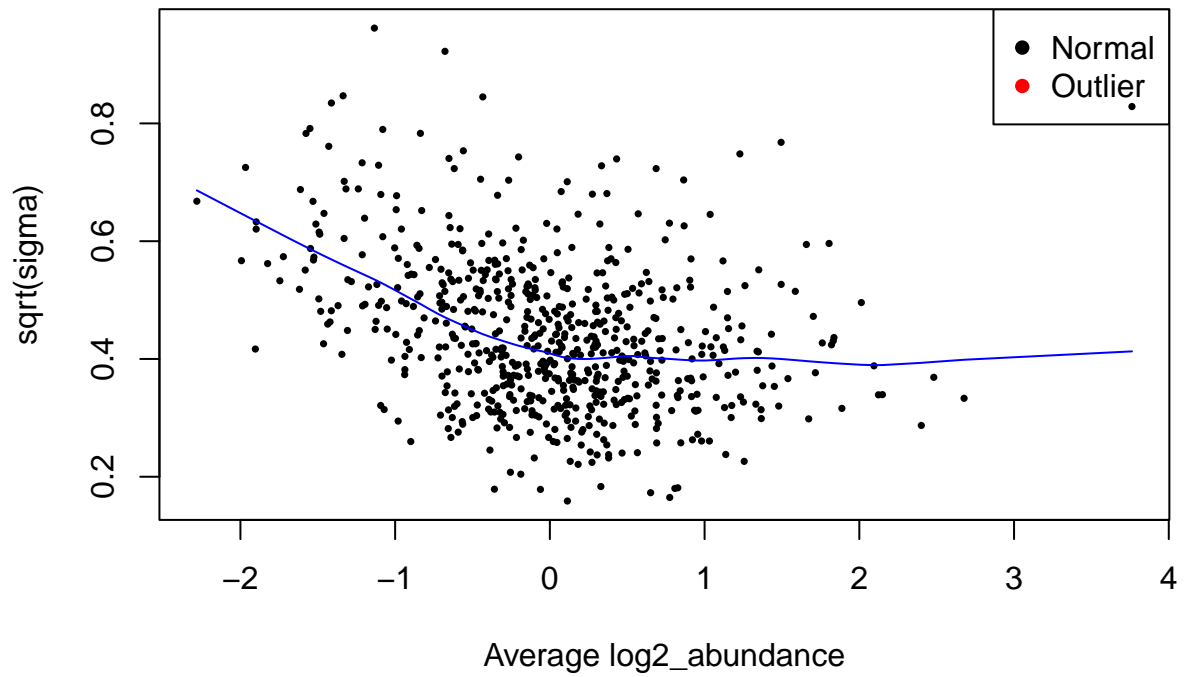

```
## [1] "TgSyp7"
##           Contrasts
## Levels   KD_control
## treatmentcontrol -1
## treatmentKD      1
```



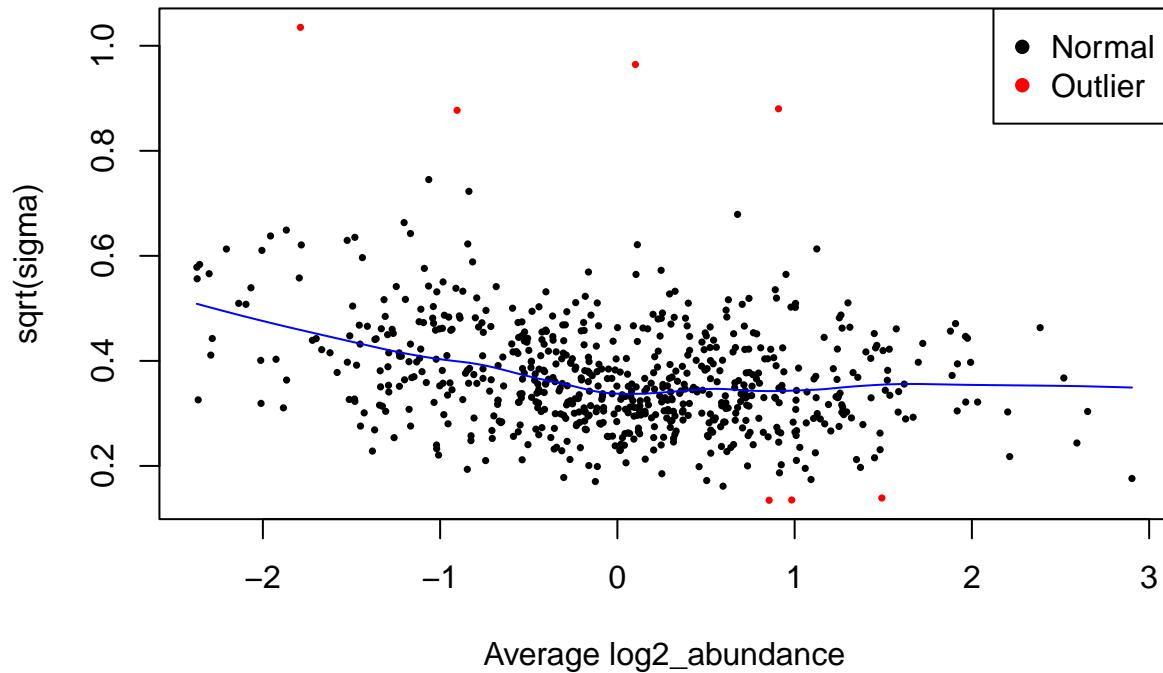

*#HyperLOPIT annotation data from Baryluk et al. 2020 <https://doi.org/10.1016/j.chom.2020.09.011> - Table*

```
df_LOPIT <-
  read_csv(file = "input/1-s2.0-S193131282030514X-mmc5.csv") %>% as.data.frame()
```

```
## Rows: 3832 Columns: 8
## -- Column specification -----
## Delimiter: ","
## chr (5): Accession, Description, markers, tagm.map.allocation, tagm.map.allo...
## dbl (3): tagm.map.probability, tagm.map.outlier, tagm.map.loc.prob
##
## i Use 'spec()' to retrieve the full column specification for this data.
## i Specify the column types or set 'show_col_types = FALSE' to quiet this message.
```

*#transcript product descriptions from ToxoDB-65\_TgondiiME49*

```
ToxoDB65_fasta <-
  readAAStringSet(filepath = "fasta files/ToxoDB-65_TgondiiME49_AnnotatedProteins.fasta",
                  format = "fasta",
                  use.names = TRUE)
```

```
Accession <- str_remove(string = names(ToxoDB65_fasta), pattern = "-t26_1-p1.*")
description <- str_match(string = names(ToxoDB65_fasta),
                        pattern = "transcript_product=(.*?) \\| location")[,2]
```

```
df_description <-
  cbind(Accession, description) %>%
```

```

as.data.frame()

rm(Accession, description)

#join descriptions and LOPIT data
df_annot <- left_join(x = df_description,
                     y = df_LOPIT %>% select(Accession, tagm.map.allocation.pred),
                     by = "Accession")

#list of output dataframes
ls_output_df <-
  lapply(X = names(ls_fit_Bayes_models),
        FUN = function(i) {

    #get object
    obj <- ls_fit_Bayes_models[[i]]

    #output dataframe
    df <-
      topTable(obj,
               coef = NULL,
               adjust.method = "BH",
               number = Inf) %>%
      rownames_to_column(var = "Accession")

    #removing "-t26_1-p1"
    df$Accession <-
      str_remove(string = df$Accession,
                 pattern = "-t26_1-p1")

    #add annotation data columns
    df2 <-
      left_join(x = df,
               y = df_annot,
               by = "Accession")

    return(df2)
  }) %>%
  set_names(nm_cell_lines)

#write as excel summary file
sheets <- list(TgLMBD3_abundance_data = ls_output_df[["TgLMBD3"]],
              TgNPSN_abundance_data = ls_output_df[["TgNPSN"]],
              TgSyp7_abundance_data = ls_output_df[["TgSyp7"]])

write_xlsx(x = sheets,
           path = paste0("files/summary_foldchange_data.xlsx"),
           col_names = TRUE,
           format_headers = TRUE)

```

```

#p-value distribution histograms
p_value_plots <-
  lapply(X = names(ls_output_df),
        FUN = function(i) {

    #get object
    obj <- ls_output_df[[i]]

    #plot histogram of p-value frequency
    plot <-
      obj %>%
      ggplot(aes(x = P.Value)) +
      geom_histogram(binwidth = 0.025) +
      theme_bw() +
      ggtitle(paste("Histogram of p-values for drug contrast in",
                    i,
                    "\n(Limma eBayes trend model)"))

    return(plot)

  })

#pdf(file = "graphs/p-value_distribution.pdf")
for (i in seq_along(p_value_plots)) {
  plot(p_value_plots[[i]])
}

```

Histogram of p-values for drug contrast in TgLMBD3  
(Limma eBayes trend model)

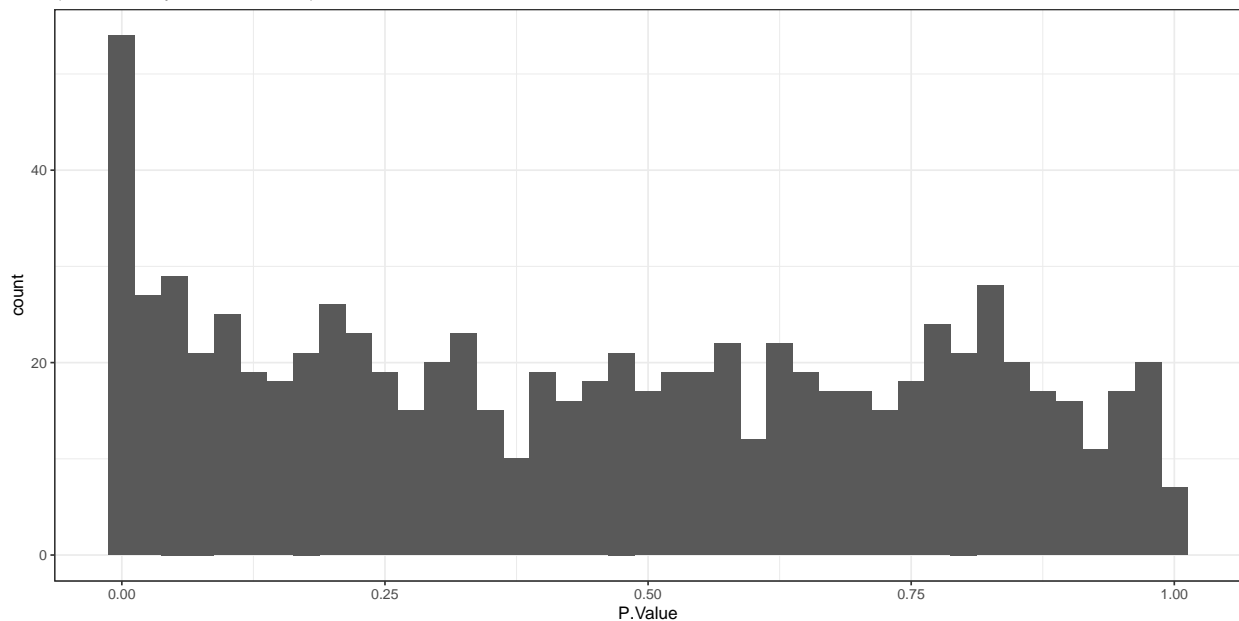

Histogram of p-values for drug contrast in TgNPSN  
(Limma eBayes trend model)

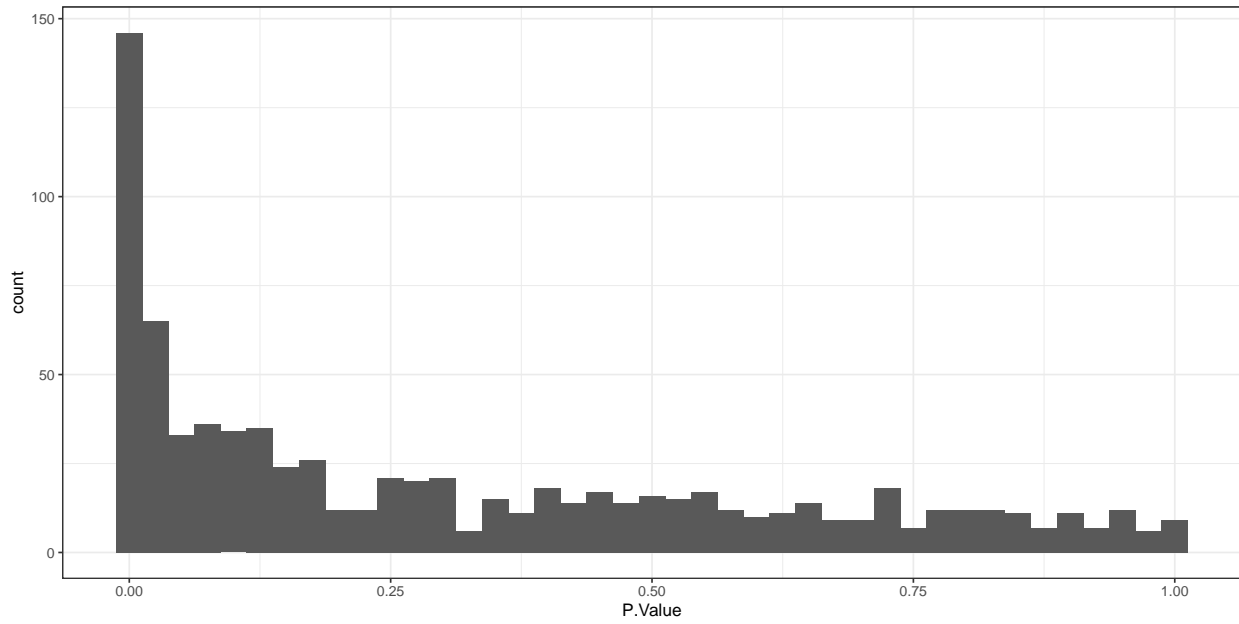

Histogram of p-values for drug contrast in TgStxPM  
(Limma eBayes trend model)

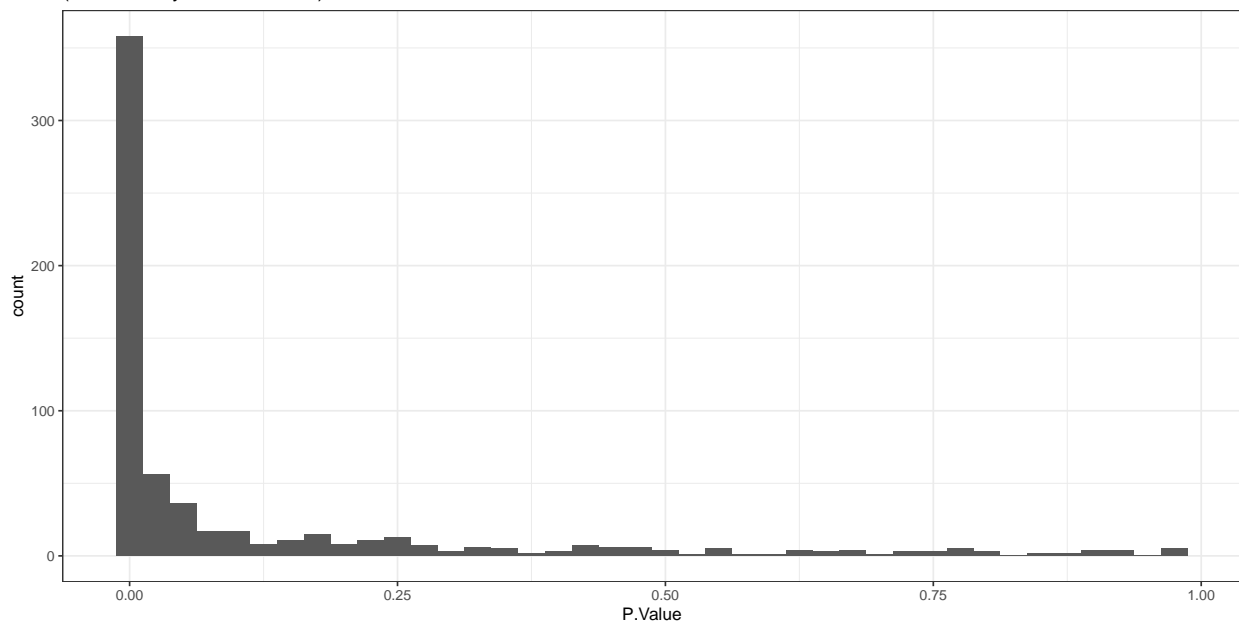

Histogram of p-values for drug contrast in TgSyp7  
(Limma eBayes trend model)

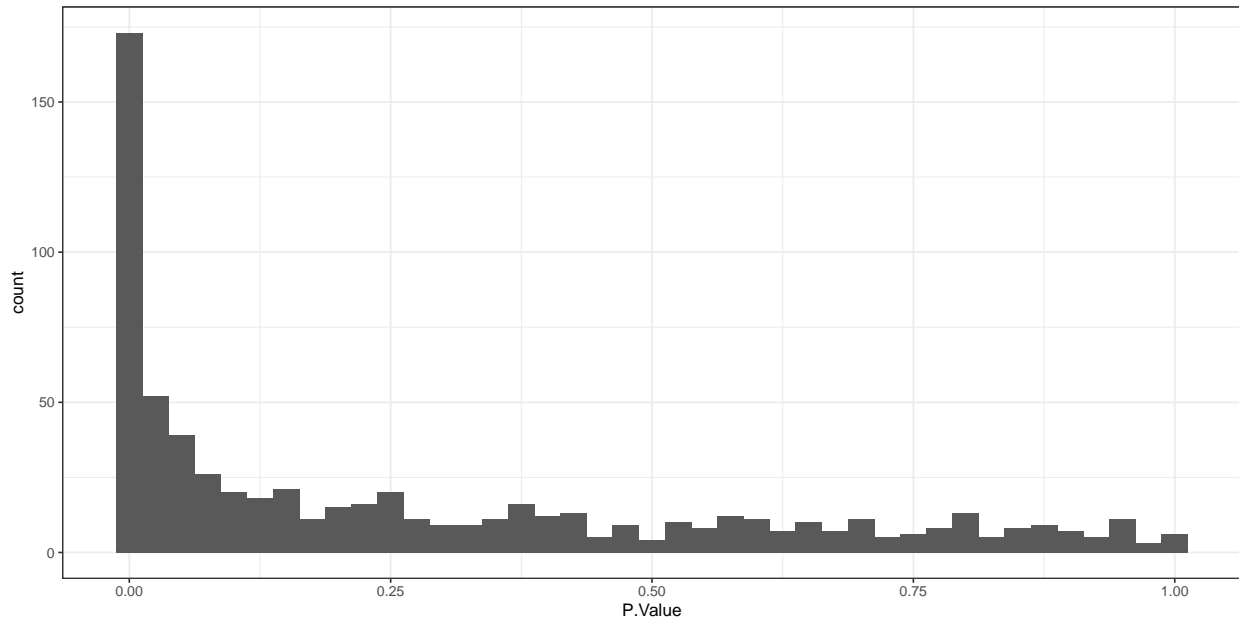

```
#dev.off()
```

```
#creating empty list
ls_all_data <-
  vector(mode = "list",
         length = length(nm_cell_lines)) %>%
  set_names(nm_cell_lines)

#filling empty list with joined dataframes from power and contrast data
for(i in 1:length(nm_cell_lines)) {

  ls_all_data[[i]] <-
    left_join(x = ls_power_dfs[[i]],
             y = ls_output_df[[i]],
             by = "Accession")
}

invisible(
  lapply(X = names(ls_all_data),
        FUN = function(i) {

    obj <- ls_all_data[[i]]

    write_csv(obj,
              file = paste0("files/",
                             i,
                             "_all_data.csv"))

  })
)
```

```

#Volcano plot with conditional colouring
ls_plots <-
  lapply(X = names(ls_all_data),
        FUN = function(i){

    obj <- ls_all_data[[i]]

    #add colour column based on p.adj and log2FC for Volcano plot
    obj <-
      obj %>%
      mutate(Volcano.colour = case_when(tagm.map.allocation.pred == "dense granules" &
        adj.P.Val <= 0.05 ~ "red",
        tagm.map.allocation.pred == "dense granules" &
        adj.P.Val > 0.05 ~ "orange",
        TRUE ~ "black"))

    plot <-
      ggplot(data = obj %>% arrange(Volcano.colour),
            mapping = aes(x = logFC,
                          y = P.Value,
                          colour = Volcano.colour)) +

      geom_point() +
      theme_bw() +
      scale_y_continuous(trans = compose_trans("log10", "reverse")) +
      scale_color_identity() +
      xlab(label = "log2-fold change") +
      ylab(label = "p-value") +
      geom_vline(xintercept = 0, linetype = "dashed") +
      ggtitle(i)

    return(plot)

  }) %>%
  set_names(nm_cell_lines)

#save all Volcano plots in individual experiment pdfs
#pdf(file = "graphs/Volcano_plots_significance.pdf")
invisible(
  lapply(X = names(ls_plots),
        FUN = function(i) {

      plot(ls_plots[[i]])

    })
)

```

TgLMBD3

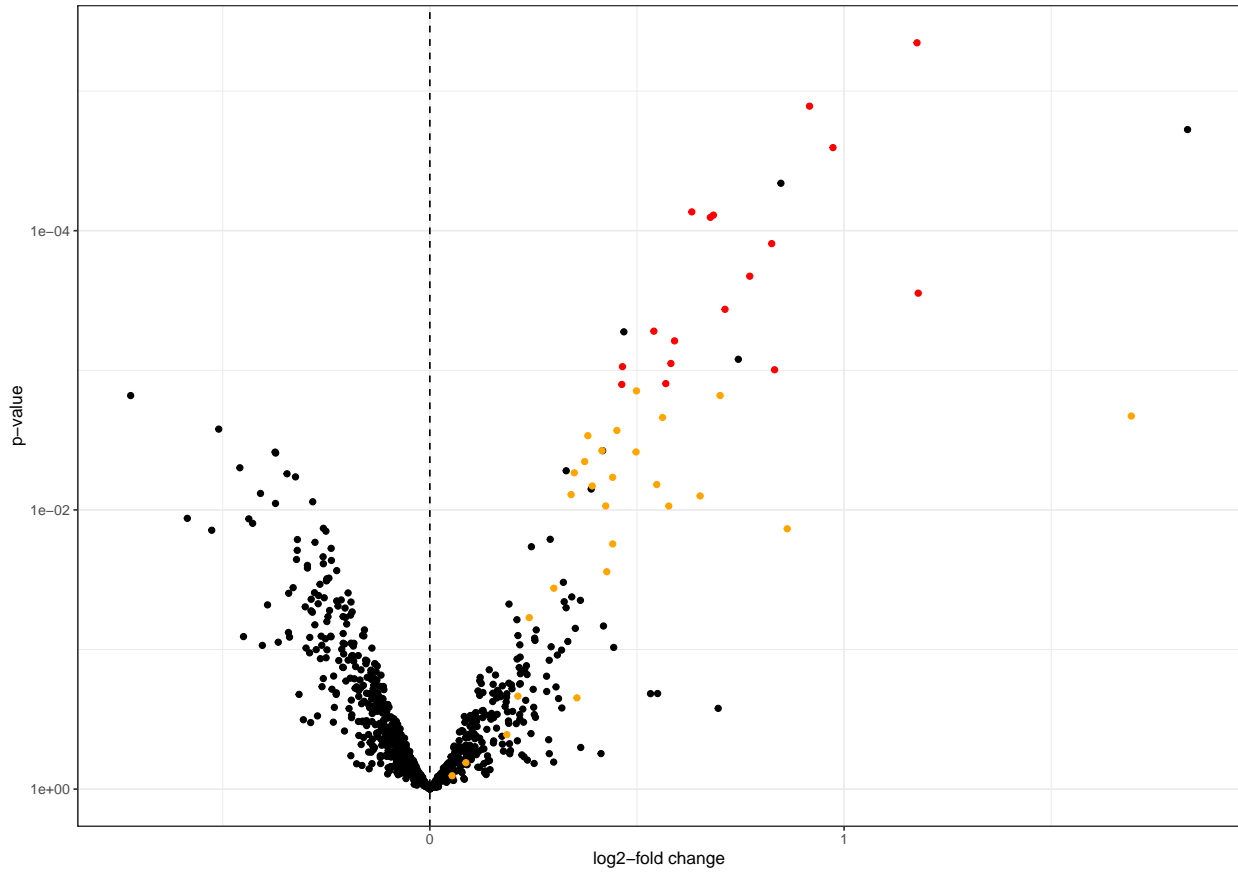

TgNPSN

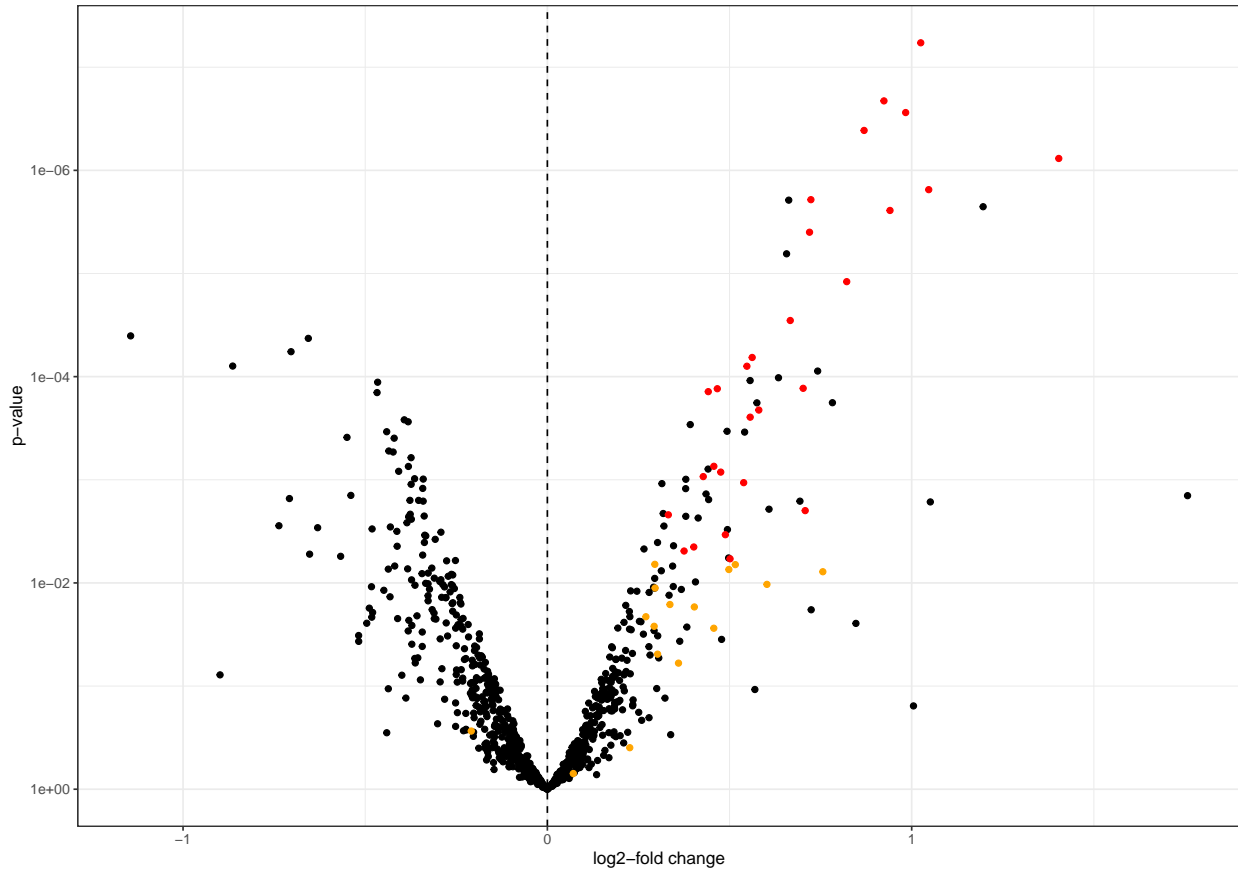



TgStxPM

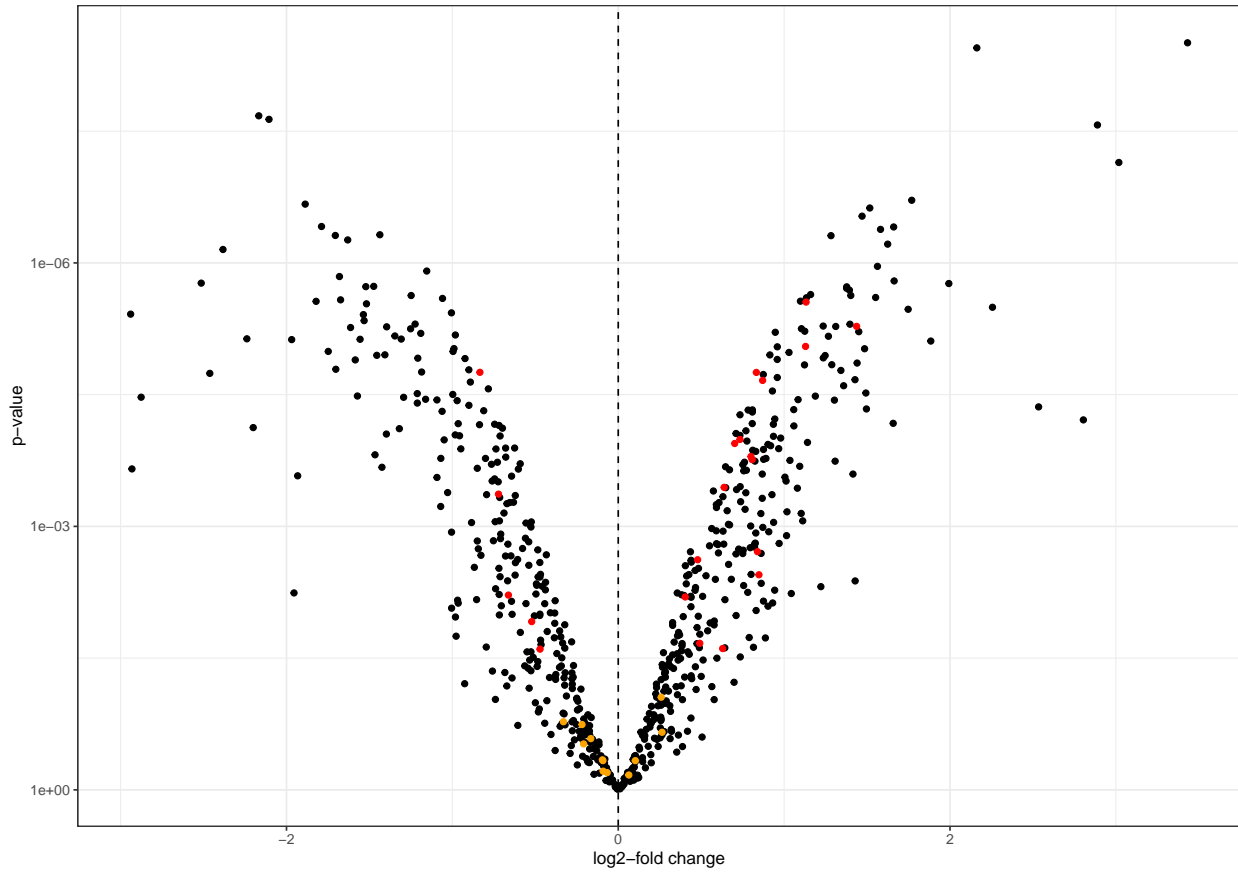

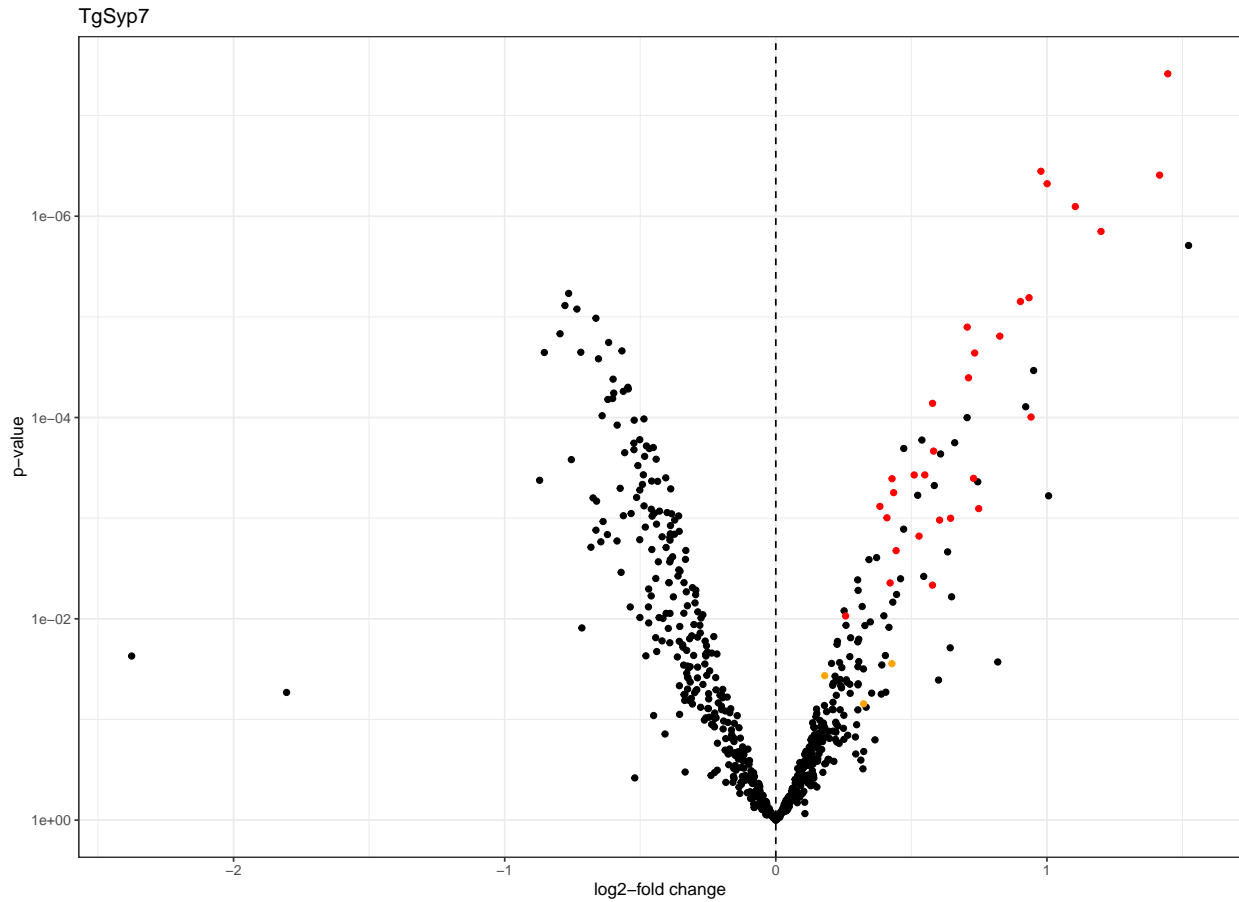

```
#dev.off()

#save as pdf in form of a 1x3 grid
#pdf(file = "graphs/Volcano_plots_cell_lines.pdf", width = 12, height = 4)
plot_grid(plotlist = ls_plots[c("TgLMBD3",
                                "TgNPSN",
                                "TgSyp7")],

          ncol = 3,
          align = "hv",
          axis = "bl")
```

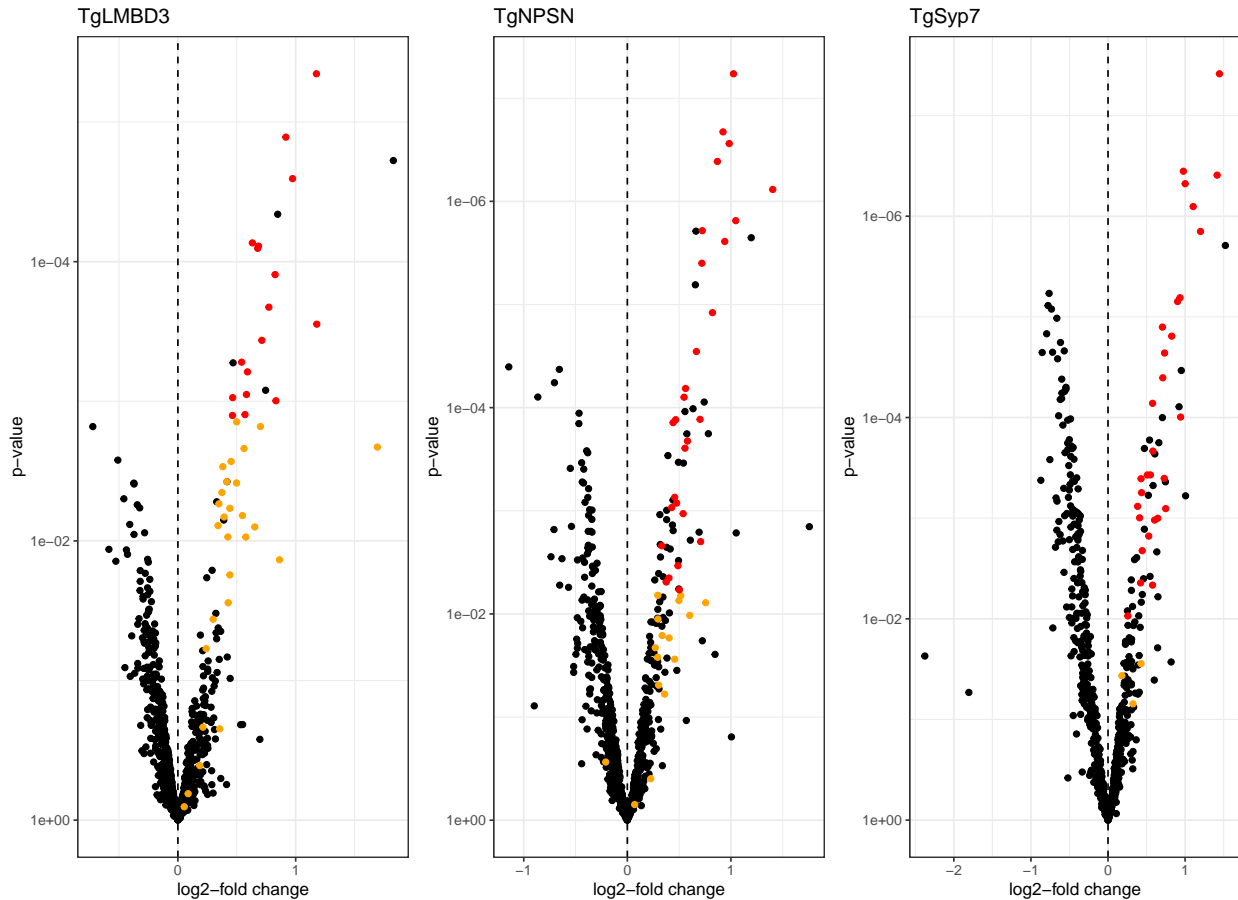

```
#dev.off()
```

```
#list of Volcano plots with power overlay
```

```
ls_plots_power <-
  lapply(X = names(ls_all_data),
        FUN = function(i) {

    #get object
    obj <- ls_all_data[[i]]

    #add colour column based on power for Volcano plot
    df <-
      obj %>%
      mutate(power.colour =
             case_when(power.KD.control < 0.8 &
                       adj.P.Val < 0.01 &
                       tagm.map.allocation.pred == "dense granules" ~ "red",
                       power.KD.control >= 0.8 &
                       adj.P.Val <= 0.01 &
                       tagm.map.allocation.pred == "dense granules" ~ "blue",
                       TRUE ~ "black"))

    plot <-
      ggplot(data = df,
```



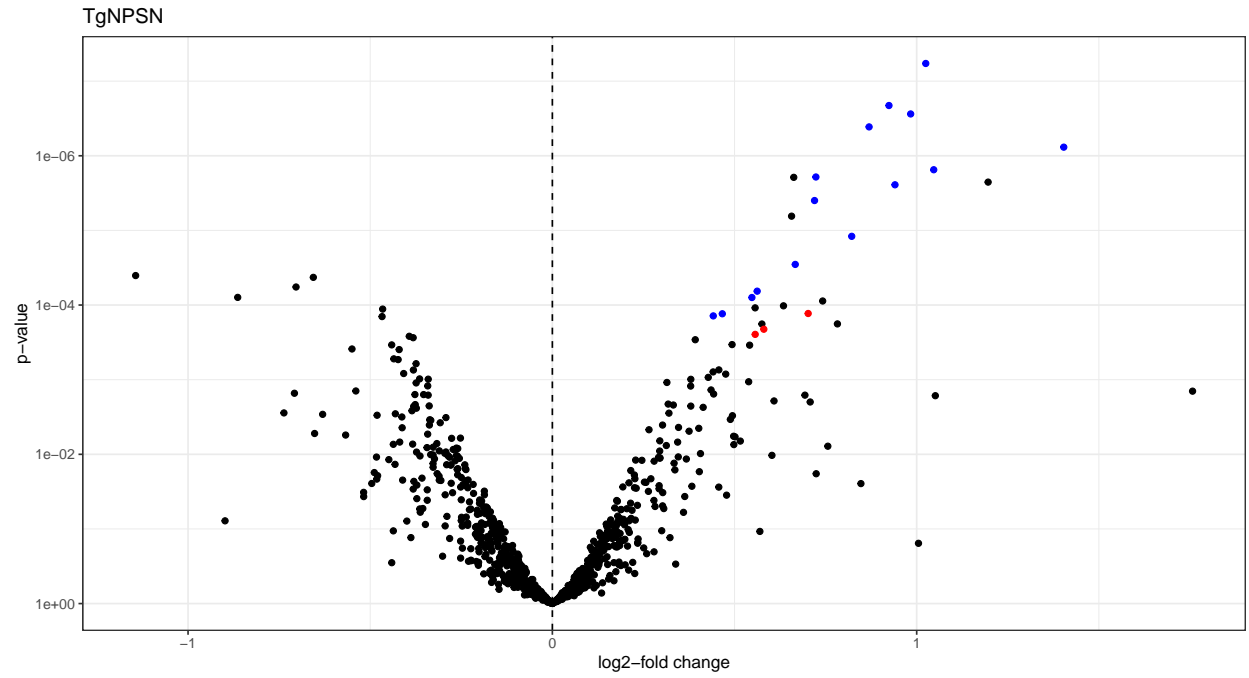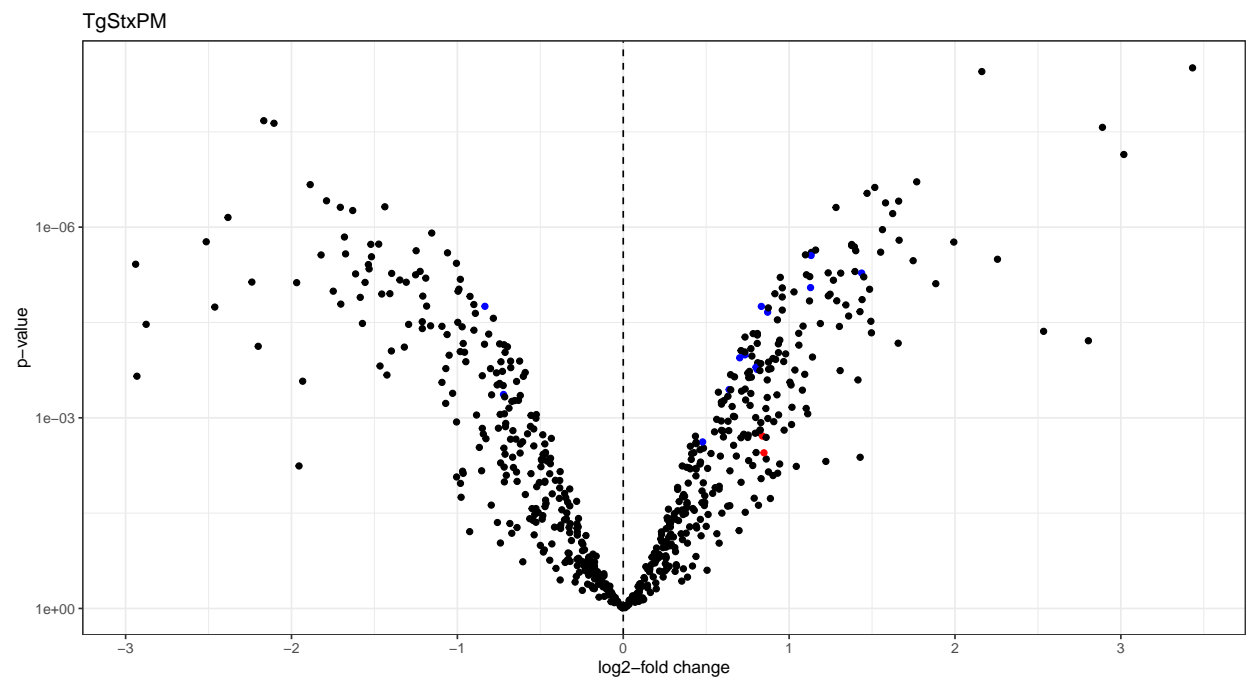

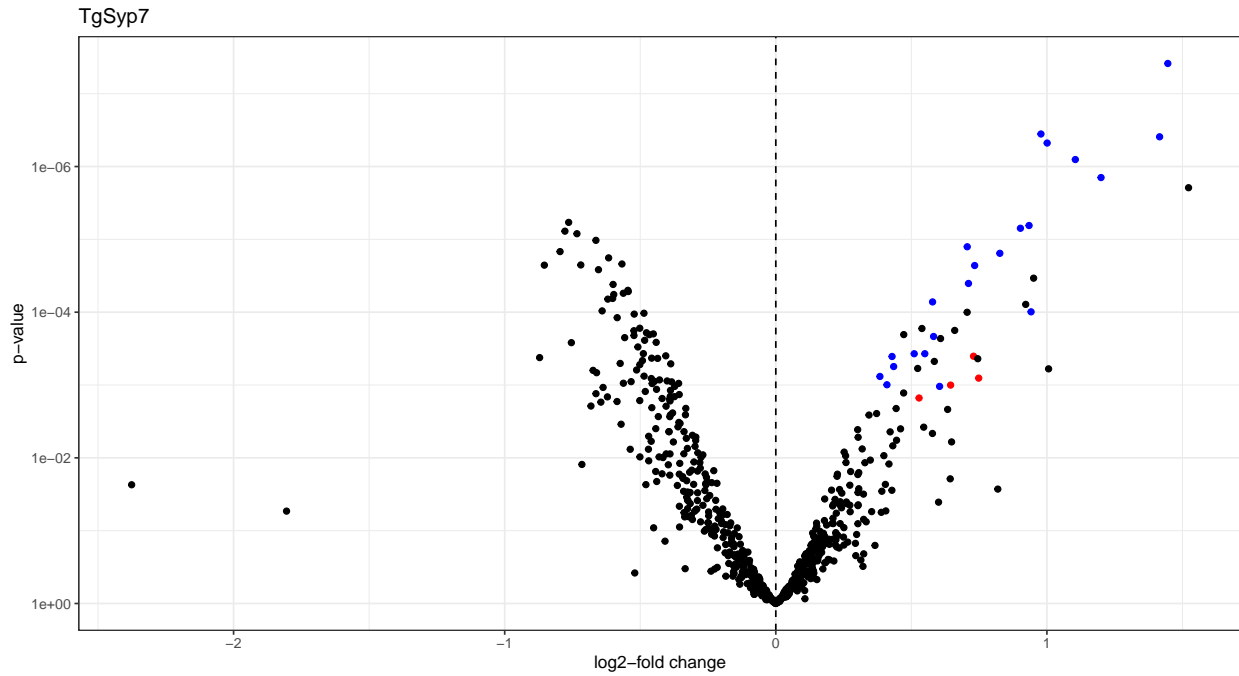

```
#dev.off()

#save as pdf in form of a 1x3 grid
#pdf(file = "graphs/Volcano_plots_cell_lines_power.pdf", width = 12, height = 4)
plot_grid(plotlist = ls_plots_power[c("TgLMBD3",
                                     "TgNPSN",
                                     "TgSyp7")],

          ncol = 3,
          align = "hv",
          axis = "bl")
```

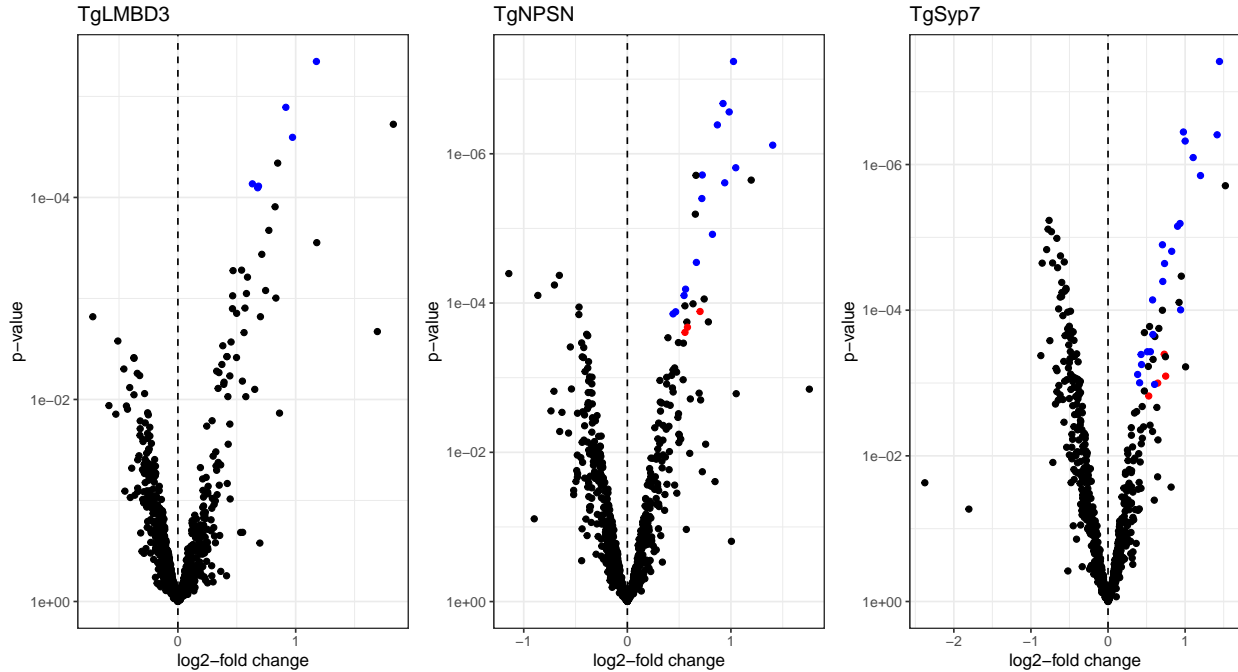

```
#dev.off()
```

```
sessionInfo()
```

```
## R version 4.3.1 (2023-06-16 ucrt)
## Platform: x86_64-w64-mingw32/x64 (64-bit)
## Running under: Windows 10 x64 (build 19045)
##
## Matrix products: default
##
##
## locale:
## [1] LC_COLLATE=English_United Kingdom.utf8
## [2] LC_CTYPE=English_United Kingdom.utf8
## [3] LC_MONETARY=English_United Kingdom.utf8
## [4] LC_NUMERIC=C
## [5] LC_TIME=English_United Kingdom.utf8
##
## time zone: Europe/London
## tzcode source: internal
##
## attached base packages:
## [1] stats4      stats      graphics  grDevices  utils      datasets  methods
## [8] base
##
## other attached packages:
## [1] conflicted_1.2.0      writexl_1.4.2
## [3] Biostings_2.68.1     XVector_0.40.0
## [5] esc_0.5.1            pwr_1.3-0
## [7] ggExtra_0.10.1       ggforce_0.4.1
## [9] limma_3.56.2         factoextra_1.0.7
```

```

## [11] FactoMineR_2.8          eulerr_7.0.0
## [13] magrittr_2.0.3          NormalyzerDE_1.18.1
## [15] QFeatures_1.10.0        MultiAssayExperiment_1.26.0
## [17] SummarizedExperiment_1.30.2 Biobase_2.60.0
## [19] GenomicRanges_1.52.0    GenomeInfoDb_1.36.3
## [21] IRanges_2.34.1          S4Vectors_0.38.1
## [23] BiocGenerics_0.46.0     MatrixGenerics_1.12.3
## [25] matrixStats_1.0.0       cowplot_1.1.1
## [27] scales_1.2.1            lubridate_1.9.2
## [29] forcats_1.0.0           stringr_1.5.0
## [31] dplyr_1.1.3             purrr_1.0.2
## [33] readr_2.1.4             tidyr_1.3.0
## [35] tibble_3.2.1            ggplot2_3.4.3
## [37] tidyverse_2.0.0
##
## loaded via a namespace (and not attached):
## [1] splines_4.3.1           later_1.3.1             bitops_1.0-7
## [4] cellranger_1.1.0        polyclip_1.10-4         preprocessCore_1.62.1
## [7] rpart_4.1.19            lifecycle_1.0.3         rstatix_0.7.2
## [10] lattice_0.21-8          vroom_1.6.3             MASS_7.3-60
## [13] flashClust_1.01-2       backports_1.4.1         Hmisc_5.1-1
## [16] rmarkdown_2.25          yaml_2.3.7              httpuv_1.6.11
## [19] sp_2.0-0                 MsCoreUtils_1.12.0     RColorBrewer_1.1-3
## [22] abind_1.4-5             zlibbioc_1.46.0         AnnotationFilter_1.24.0
## [25] RCurl_1.98-1.12        nnet_7.3-19             tweenr_2.0.2
## [28] sandwich_3.0-2          GenomeInfoDbData_1.2.10 ggrepel_0.9.3
## [31] terra_1.7-46            nortest_1.0-4           codetools_0.2-19
## [34] DelayedArray_0.26.7     DT_0.29                 tidyselect_1.2.0
## [37] RcmdrMisc_2.9-0         raster_3.6-23           farver_2.1.1
## [40] base64enc_0.1-3         e1071_1.7-13            ellipsis_0.3.2
## [43] Formula_1.2-5           emmeans_1.8.8           polylabelr_0.2.0
## [46] tools_4.3.1            Rcpp_1.0.11             glue_1.6.2
## [49] gridExtra_2.3           BiocBaseUtils_1.2.0     xfun_0.40
## [52] mgcv_1.9-0              withr_2.5.1             BiocManager_1.30.22
## [55] fastmap_1.1.1           fansi_1.0.4             digest_0.6.33
## [58] timechange_0.2.0        R6_2.5.1                mime_0.12
## [61] estimability_1.4.1      colorspace_2.1-0        utf8_1.2.3
## [64] generics_0.1.3          hexbin_1.28.3           data.table_1.14.8
## [67] class_7.3-22            htmlwidgets_1.6.2       S4Arrays_1.0.6
## [70] scatterplot3d_0.3-44    pkgconfig_2.0.3         gtable_0.3.4
## [73] htmltools_0.5.6         carData_3.0-5           multcompView_0.1-9
## [76] ProtGenerics_1.32.0     clue_0.3-65             leaps_3.1
## [79] knitr_1.44              rstudioapi_0.15.0       tzdb_0.4.0
## [82] coda_0.19-4             checkmate_2.2.0         nlme_3.1-163
## [85] proxy_0.4-27           zoo_1.8-12              cachem_1.0.8
## [88] parallel_4.3.1          miniUI_0.1.1.1          foreign_0.8-85
## [91] vsn_3.68.0              pillar_1.9.0            grid_4.3.1
## [94] vctrs_0.6.3            ggpubr_0.6.0            promises_1.2.1
## [97] car_3.1-2              xtable_1.8-4            cluster_2.1.4
## [100] htmlTable_2.4.1         evaluate_0.21           mvtnorm_1.2-3
## [103] cli_3.6.1              compiler_4.3.1          rlang_1.1.1
## [106] crayon_1.5.2           ggsignif_0.6.4          labeling_0.4.3
## [109] affy_1.78.2            stringi_1.7.12          munsell_0.5.0
## [112] lazyeval_0.2.2         Matrix_1.6-1            hms_1.1.3

```



```
## [115] bit64_4.0.5      statmod_1.5.0      shiny_1.7.5
## [118] haven_2.5.3          broom_1.0.5        igraph_1.5.1
## [121] memoise_2.0.1       affyio_1.70.0     bit_4.0.5
## [124] readxl_1.4.3        ape_5.7-1
```
