# Supplementary material for: Apical annuli are specialised sites of post-invasion secretion of dense granules in Toxoplasma
Source: eLife journal article supplement (doi:10.7554/elife.94201), 2024-01-25
Supplement: supp [file Source data description.docx]

**Figure 5- figure supplement 1-source data 1 (WB validation of V5 cell lines)**

Western blots of cell lysates using anti-V5 antibody showing TgNPSN, TgStxPM, and TgSyp7 were successfully tagged with 3xV5. Expected molecular weight for each protein tagged with 3V5 are NPSN: 47 kDa, StxPM: 79 kDa and Syp7:49 kDa. The molecular weight ladder used is provided by Invitrogen, Catalogue number: LC5925.
