# Supplementary material for: Apical annuli are specialised sites of post-invasion secretion of dense granules in Toxoplasma
Source: eLife journal article supplement (doi:10.7554/elife.94201), 2024-01-25
Supplement: supp [file Source data description.docx]

**Figure 1-source data 1 (trypsin shaving assay)**

Trypsin-shaving sensitivity over four hours (hr), visualised on Western blots of TgLMBD3-6xHA extracts using antibodies against HA, Tom40, Sag1, profilin (Prf) and Gap40. Expected molecular weights for each protein are LMBD3-6xHA: 81 kDa, Tom40 :51 kDa, Sag1: 33 kDa, Profilin: 17 kDa. The molecular weight ladder used is provided by Invitrogen, Catalogue number: LC5925.
