# Supplementary material for: Apical annuli are specialised sites of post-invasion secretion of dense granules in Toxoplasma
Source: eLife journal article supplement (doi:10.7554/elife.94201), 2024-01-25
Supplement: supp [file Source data description.docx]

**Figure 5- source data 4- Syp7 kd kinetics**

Depletion of mAID-3V5-Syp7 following the commencement of IAA auxin treatment observed by anti-V5 Western blot. Syp7 is fully depleted after 6 hours of IAA treatment. Histone H3 serves as a loading control. The expected molecular weights for mAID-3V5-Syp7 and H3 are 58 kDa and 15 kDa, respectively. The molecular weight ladder used is provided by Invitrogen, Catalogue number: LC5925.
