# Supplementary material for: Apical annuli are specialised sites of post-invasion secretion of dense granules in Toxoplasma
Source: eLife journal article supplement (doi:10.7554/elife.94201), 2024-01-25
Supplement: supp [file Source data description.docx]

**Figure 5- figure supplement 1-source data 2 (validation of cell lines by PCR)**

PCR agarose gel showing successful integration of epitope tag in the intended locus for each apical annuli protein. For TgNPSN, TgStxPM, TgSyp7, a universal forward primer that anneals in the promoter region is used together with a gene-specific reverse primer to obtain a PCR product. For TgLMBD3, a gene-specific forward primer is used together with a reverse primer annealing in the terminator region. Parental cell lines for the transfection are used as a negative control.
