# Supplementary material for: Apical annuli are specialised sites of post-invasion secretion of dense granules in Toxoplasma
Source: eLife journal article supplement (doi:10.7554/elife.94201), 2024-01-25
Supplement: supp [file Source data description.docx]

**Figure 5- source data 2- NPSN kd kinetics**

Depletion of mAID-3V5-NPSN following the commencement of IAA auxin treatment observed by anti-V5 Western blot. NPSN is fully depleted after 6 hours of IAA treatment. Histone H3 serves as a loading control. The expected molecular weights for mAID-3V5-NPSN and H3 are 55 KDA and 15 kDa, respectively. The molecular weight ladder used is provided by Invitrogen, Catalogue number: LC5925.
