# Supplementary figures and images for: Apical annuli are specialised sites of post-invasion secretion of dense granules in Toxoplasma
Source: eLife journal article supplement (doi:10.7554/elife.94201), 2024-01-25

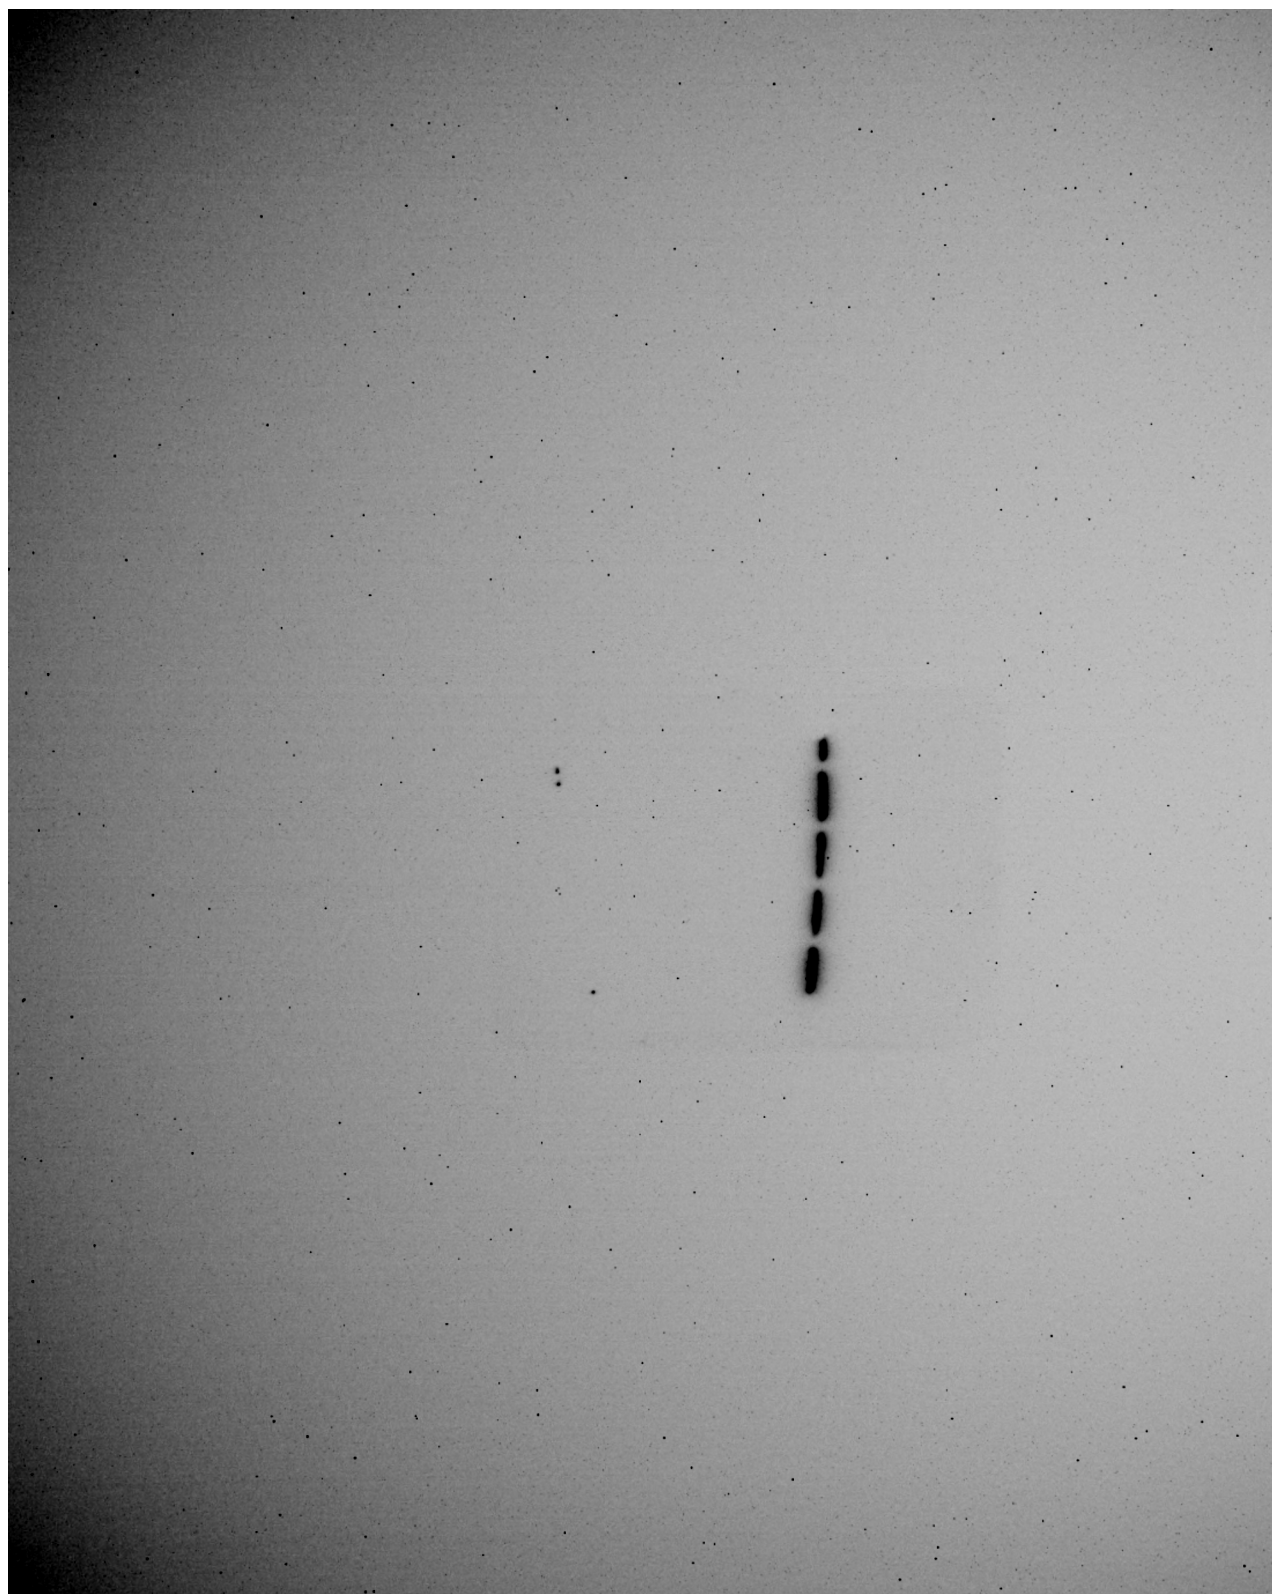

Supplement: supp [file elife-94201-supp-v1.zip]

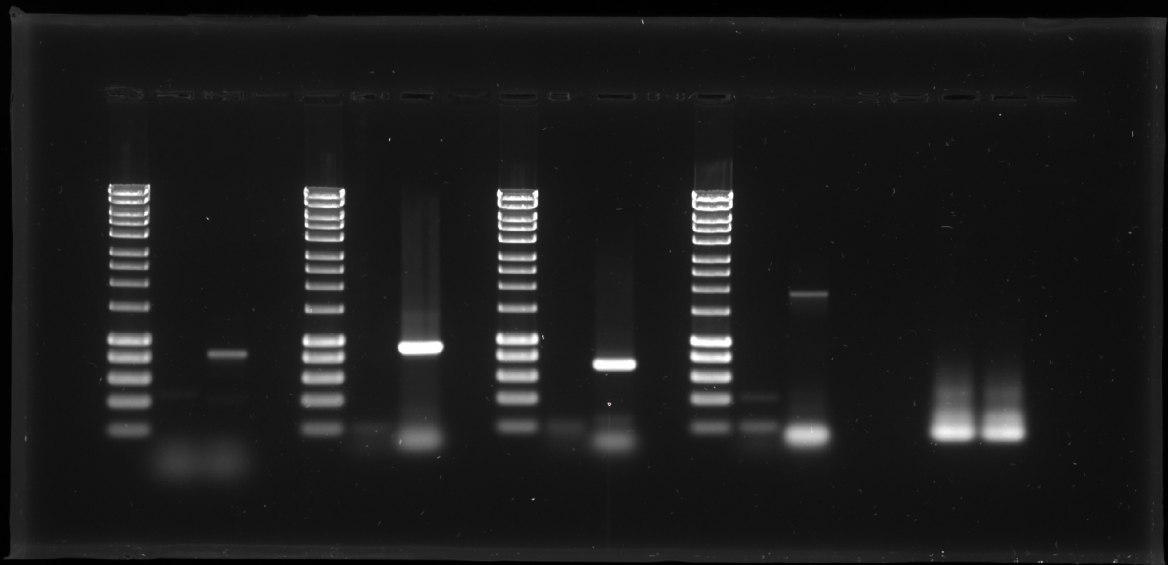

Supplement: supp [file elife-94201-supp-v1.zip]

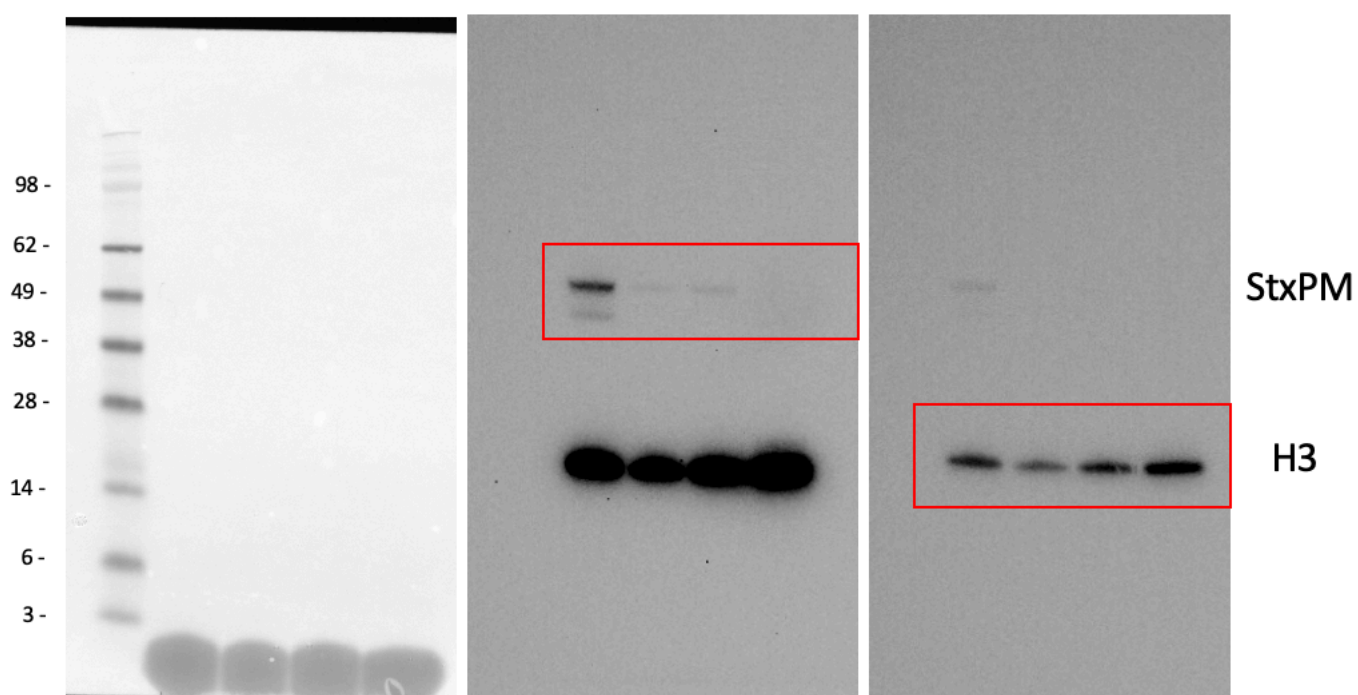

Supplement: supp [file elife-94201-supp-v1.zip]

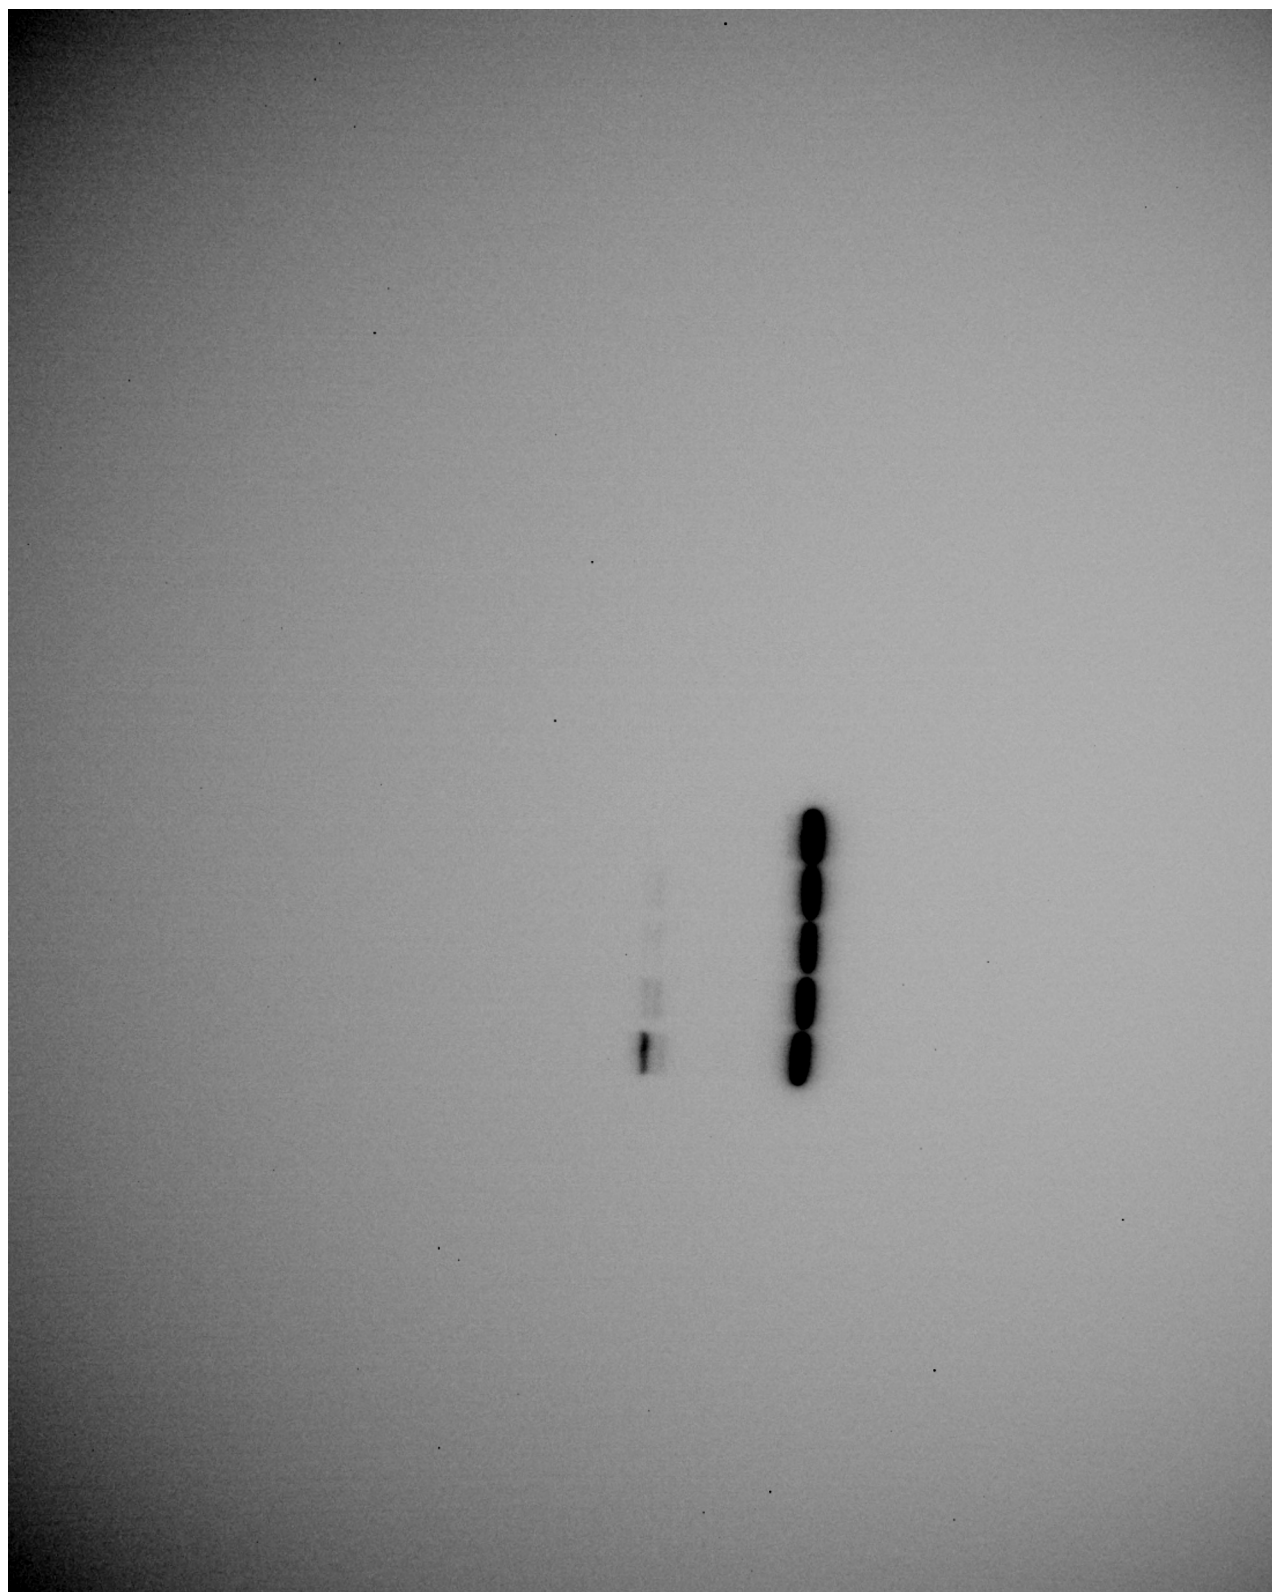

Supplement: supp [file elife-94201-supp-v1.zip]

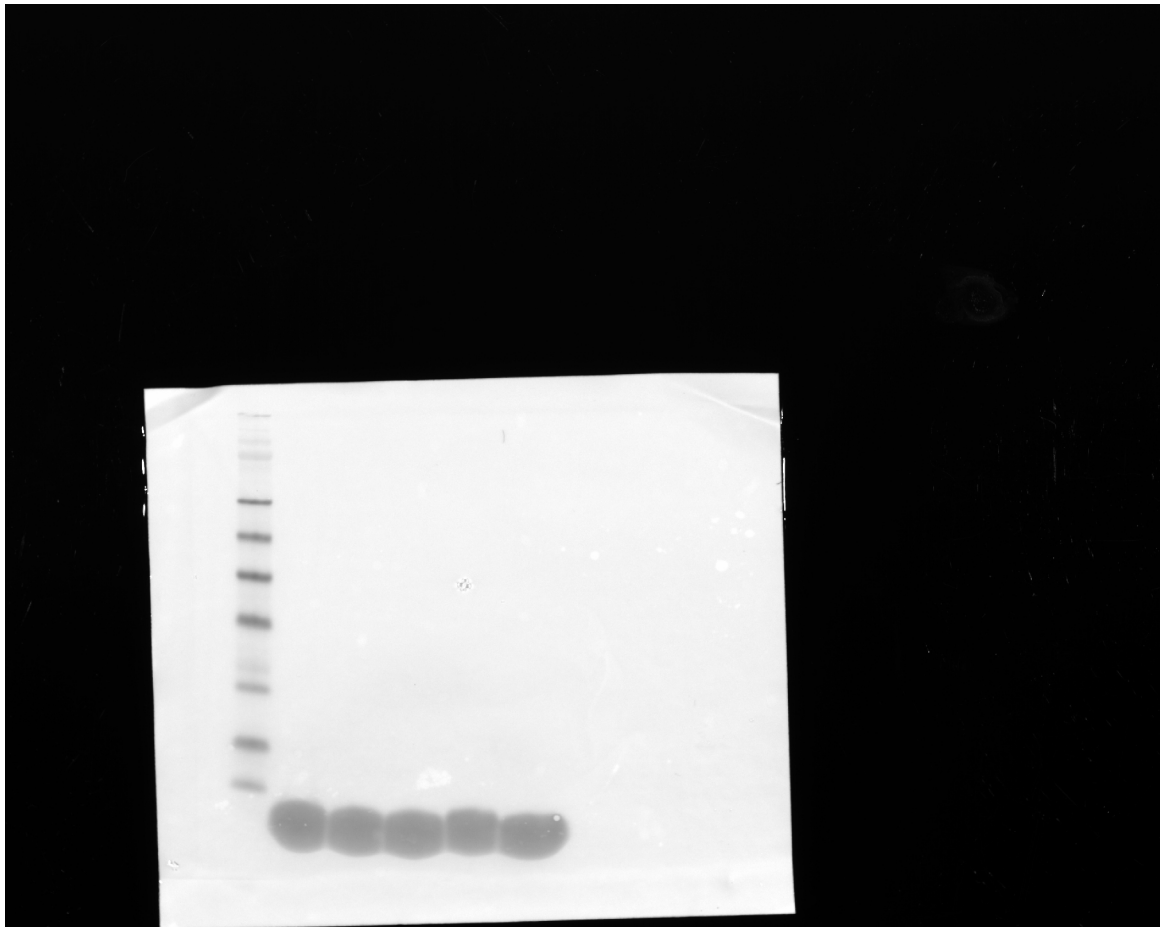

Supplement: supp [file elife-94201-supp-v1.zip]

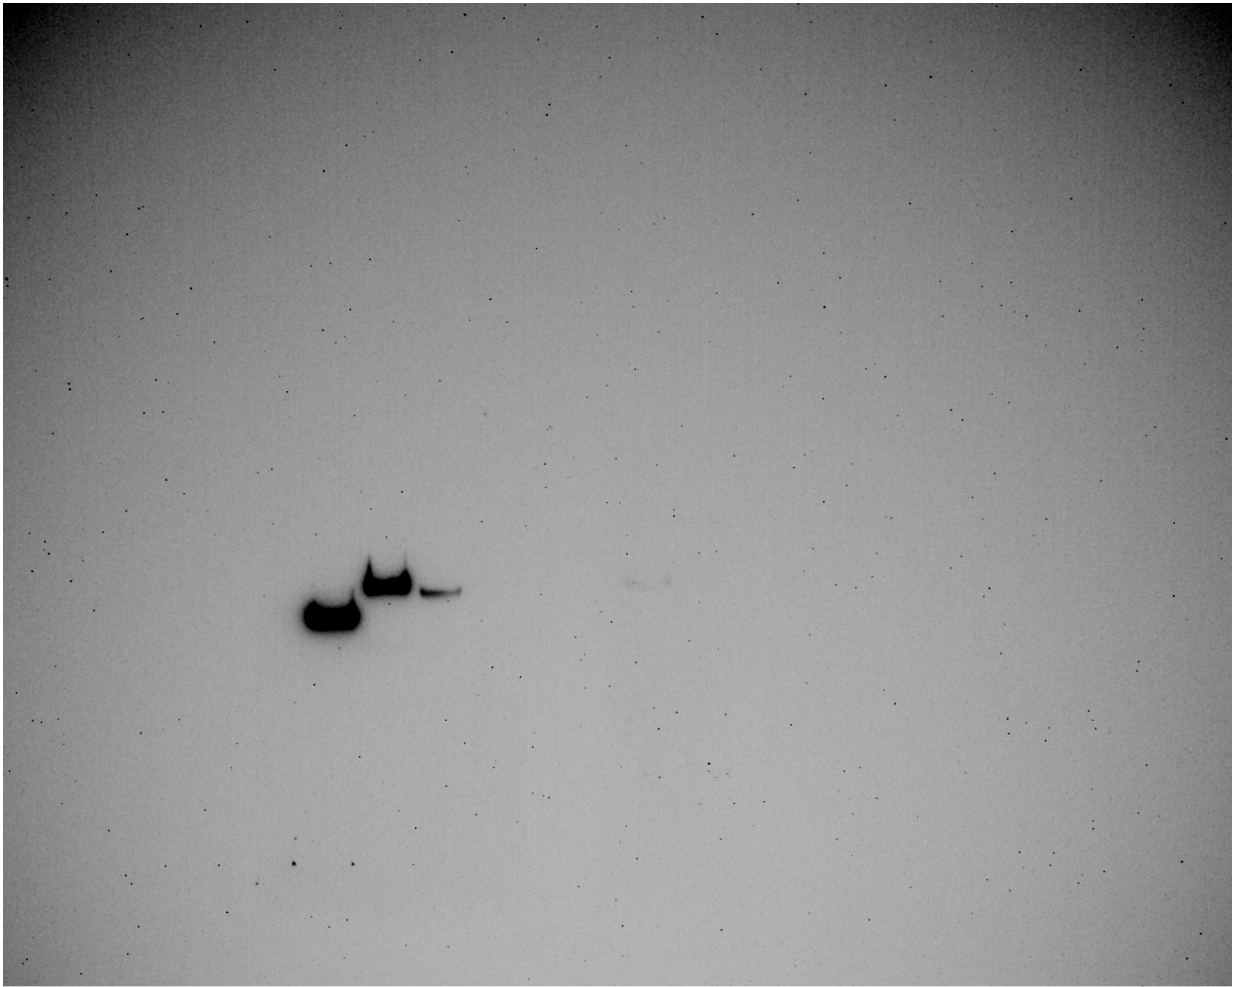

Supplement: supp [file elife-94201-supp-v1.zip]

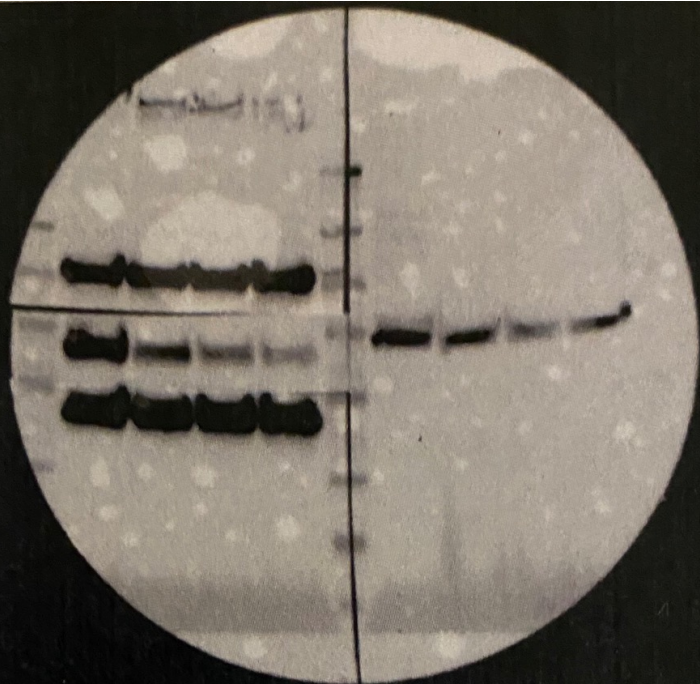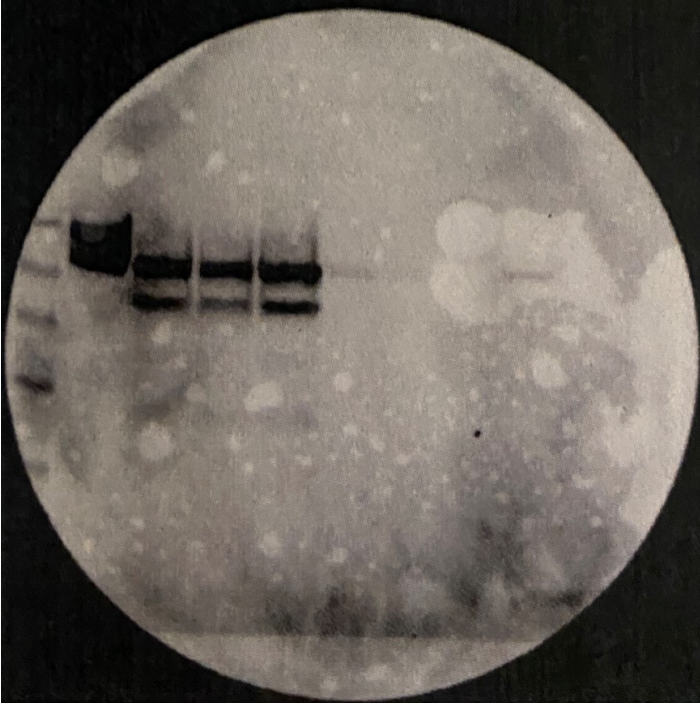

Supplement: supp [file elife-94201-supp-v1.zip]

98 -  
62 -  
49 -  
38 -  
28 -  
14 -  
6 -  
3 -

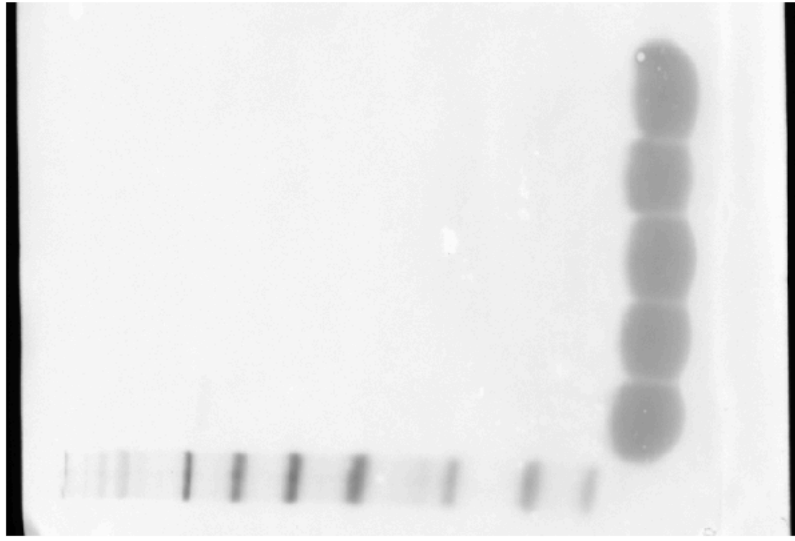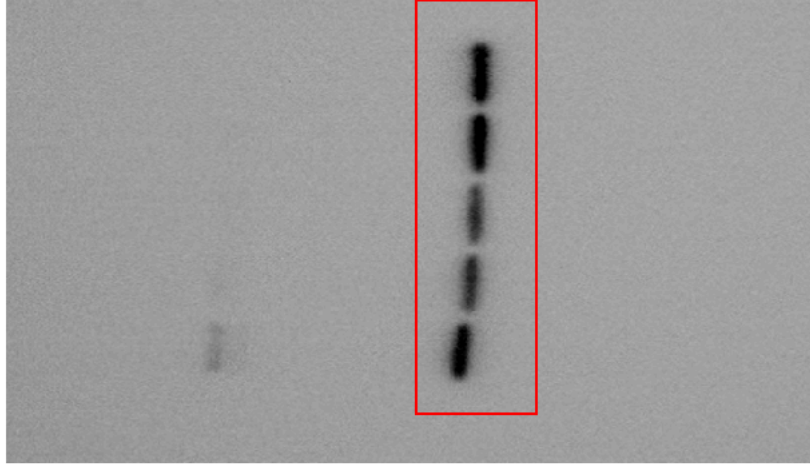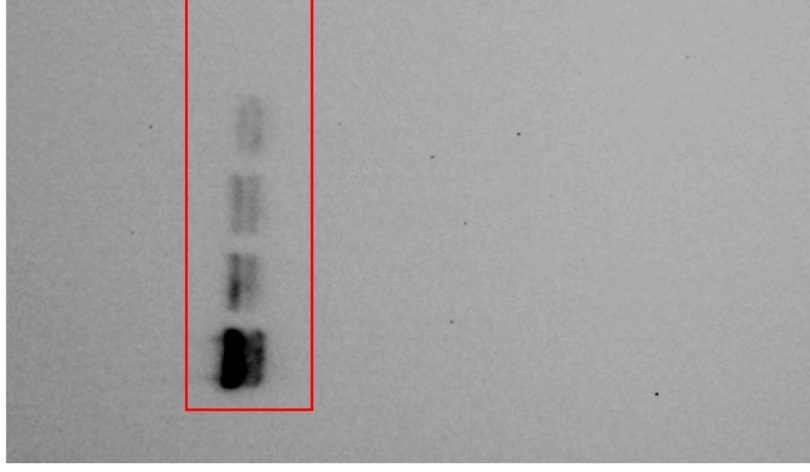

H3

Syp7

Supplement: supp [file elife-94201-supp-v1.zip]

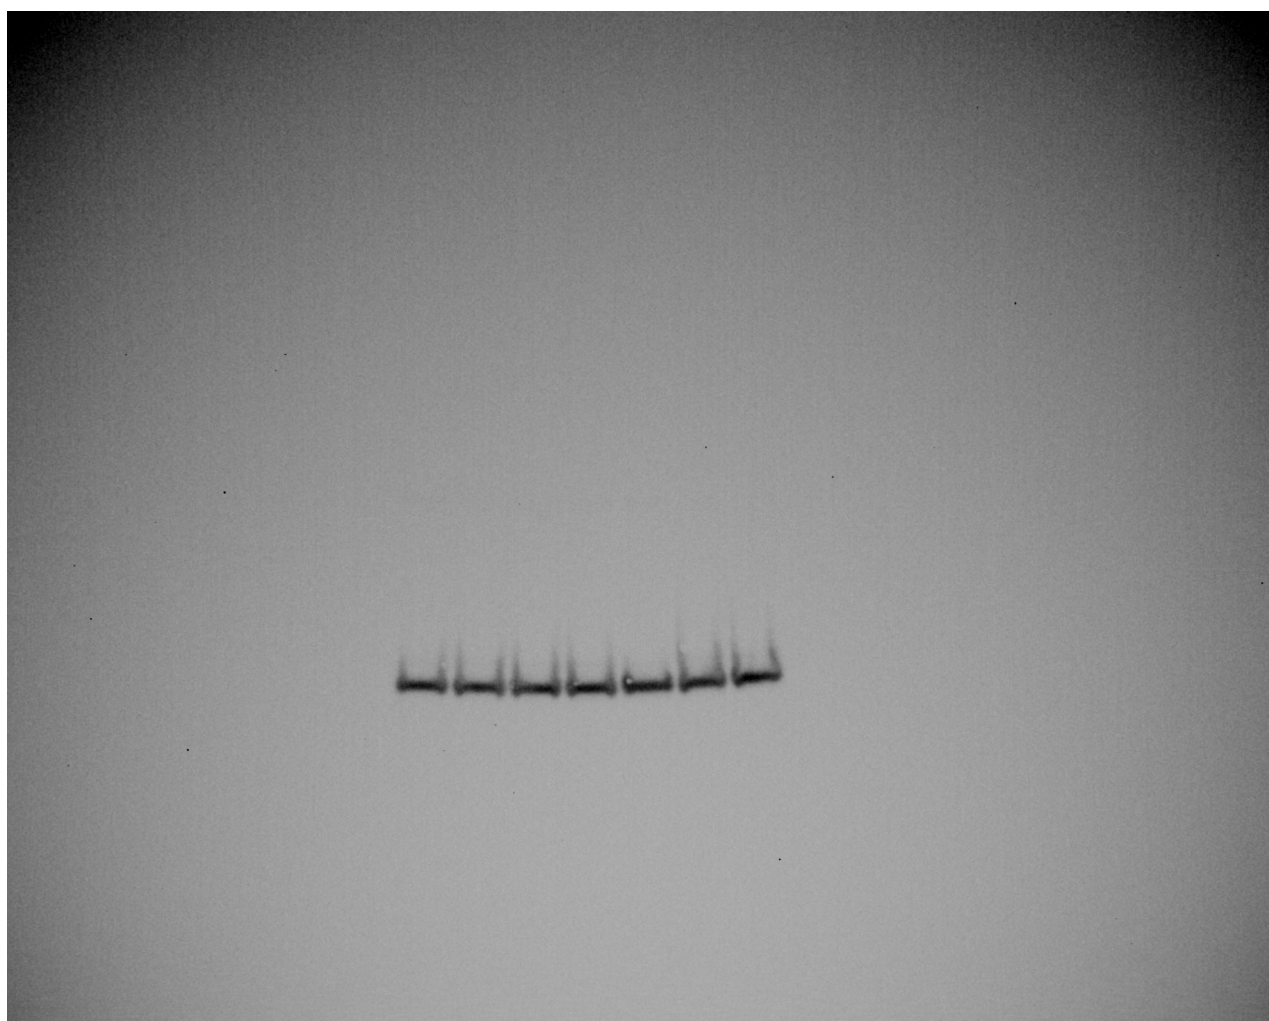

Supplement: supp [file elife-94201-supp-v1.zip]

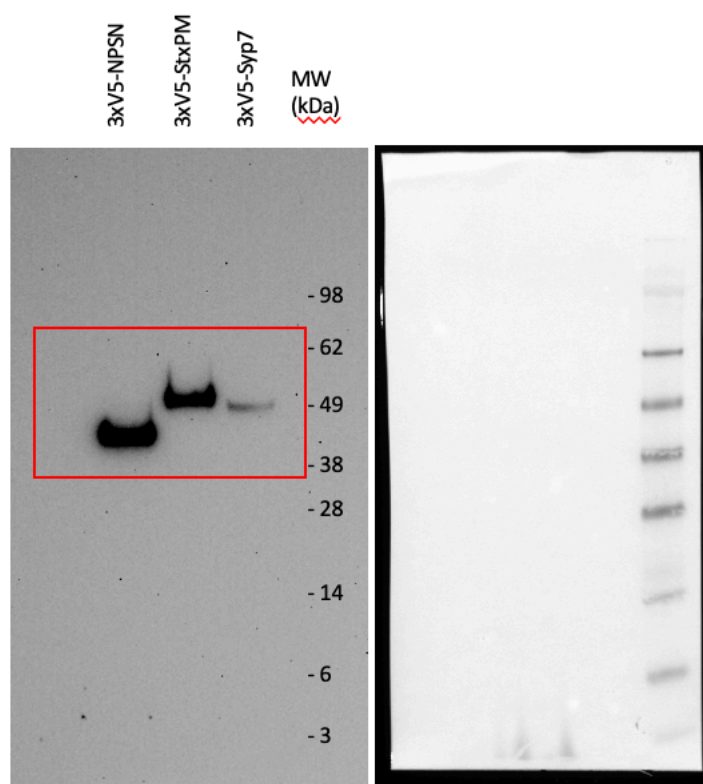

Supplement: supp [file elife-94201-supp-v1.zip]

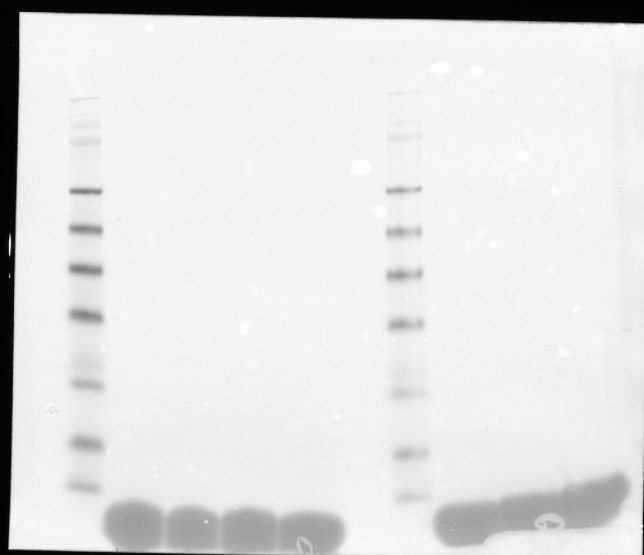

Supplement: supp [file elife-94201-supp-v1.zip]

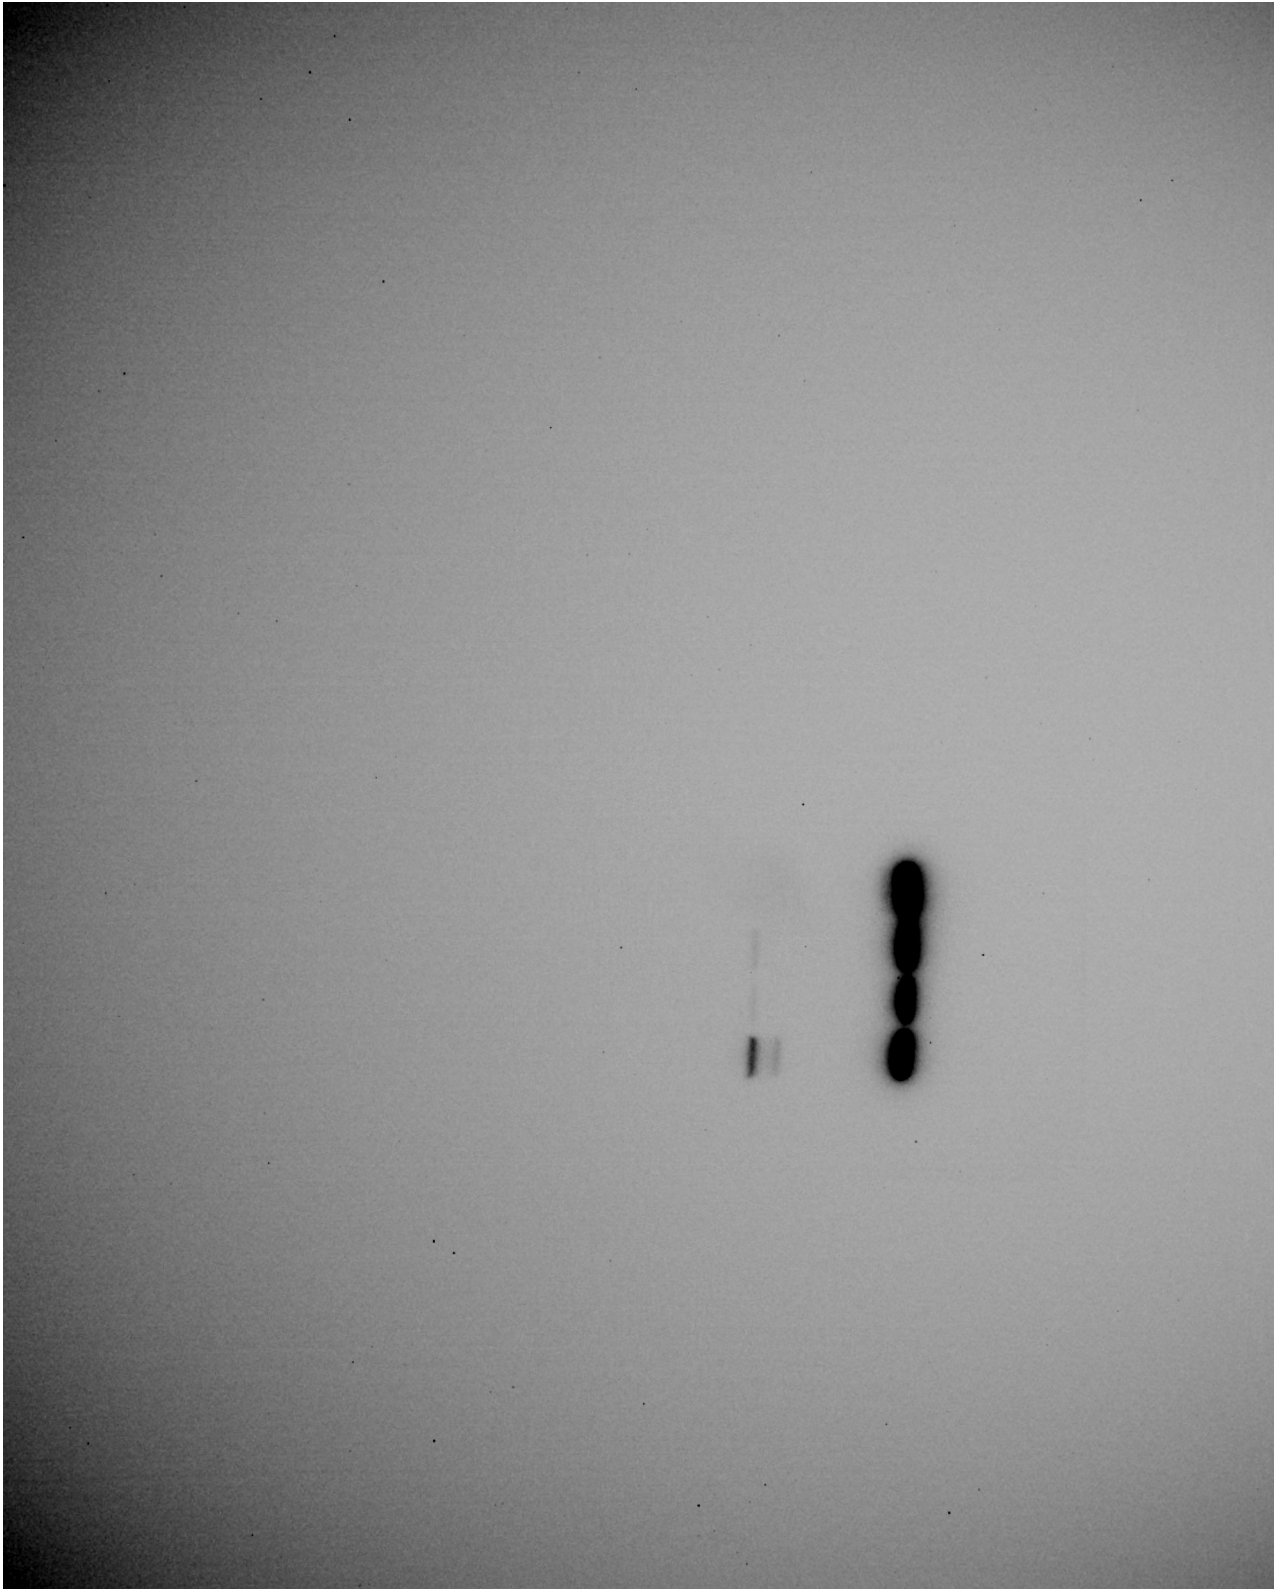

Supplement: supp [file elife-94201-supp-v1.zip]

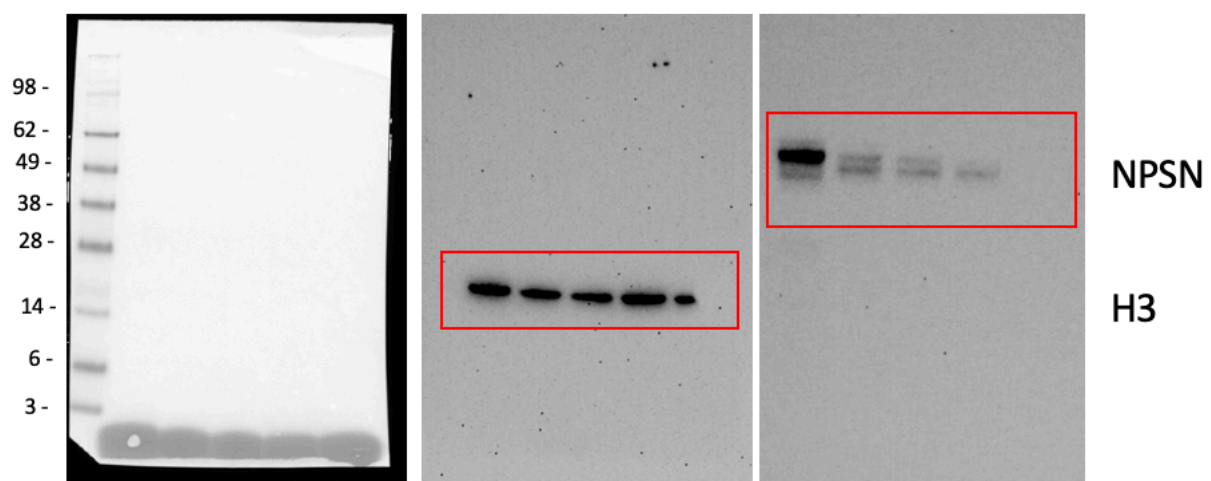

Supplement: supp [file elife-94201-supp-v1.zip]

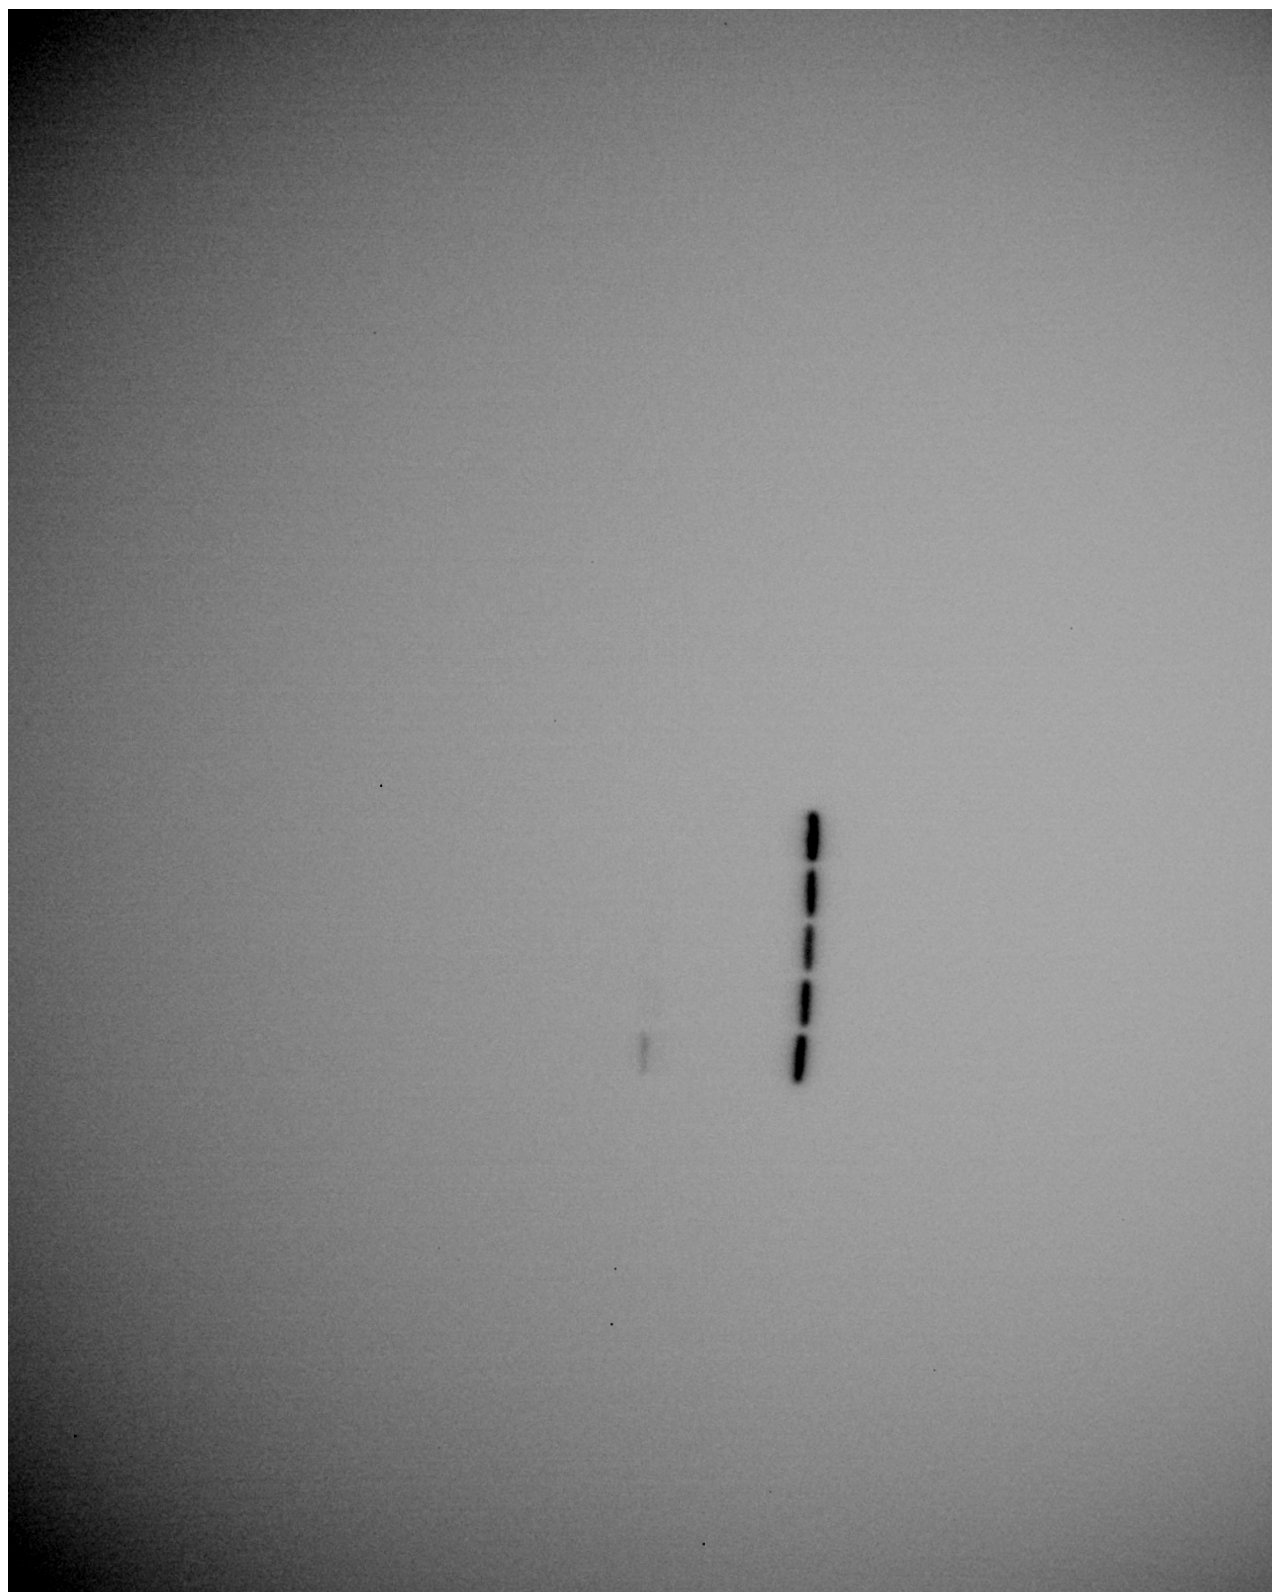

Supplement: supp [file elife-94201-supp-v1.zip]

# PCR validation of mAID cell lines

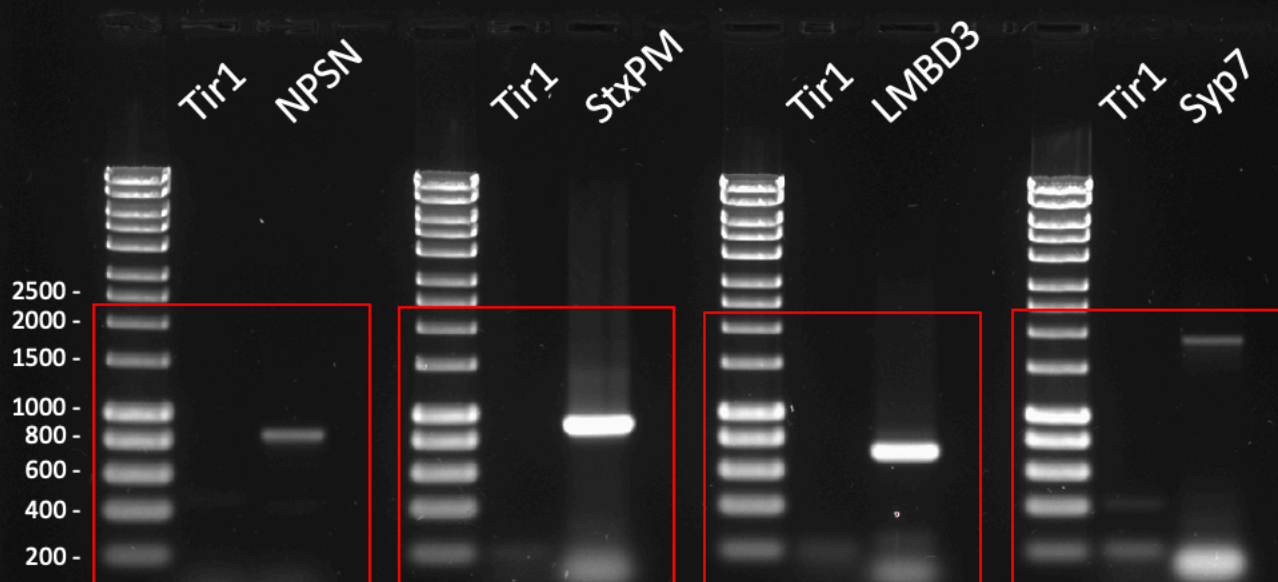

Supplement: supp [file elife-94201-supp-v1.zip]

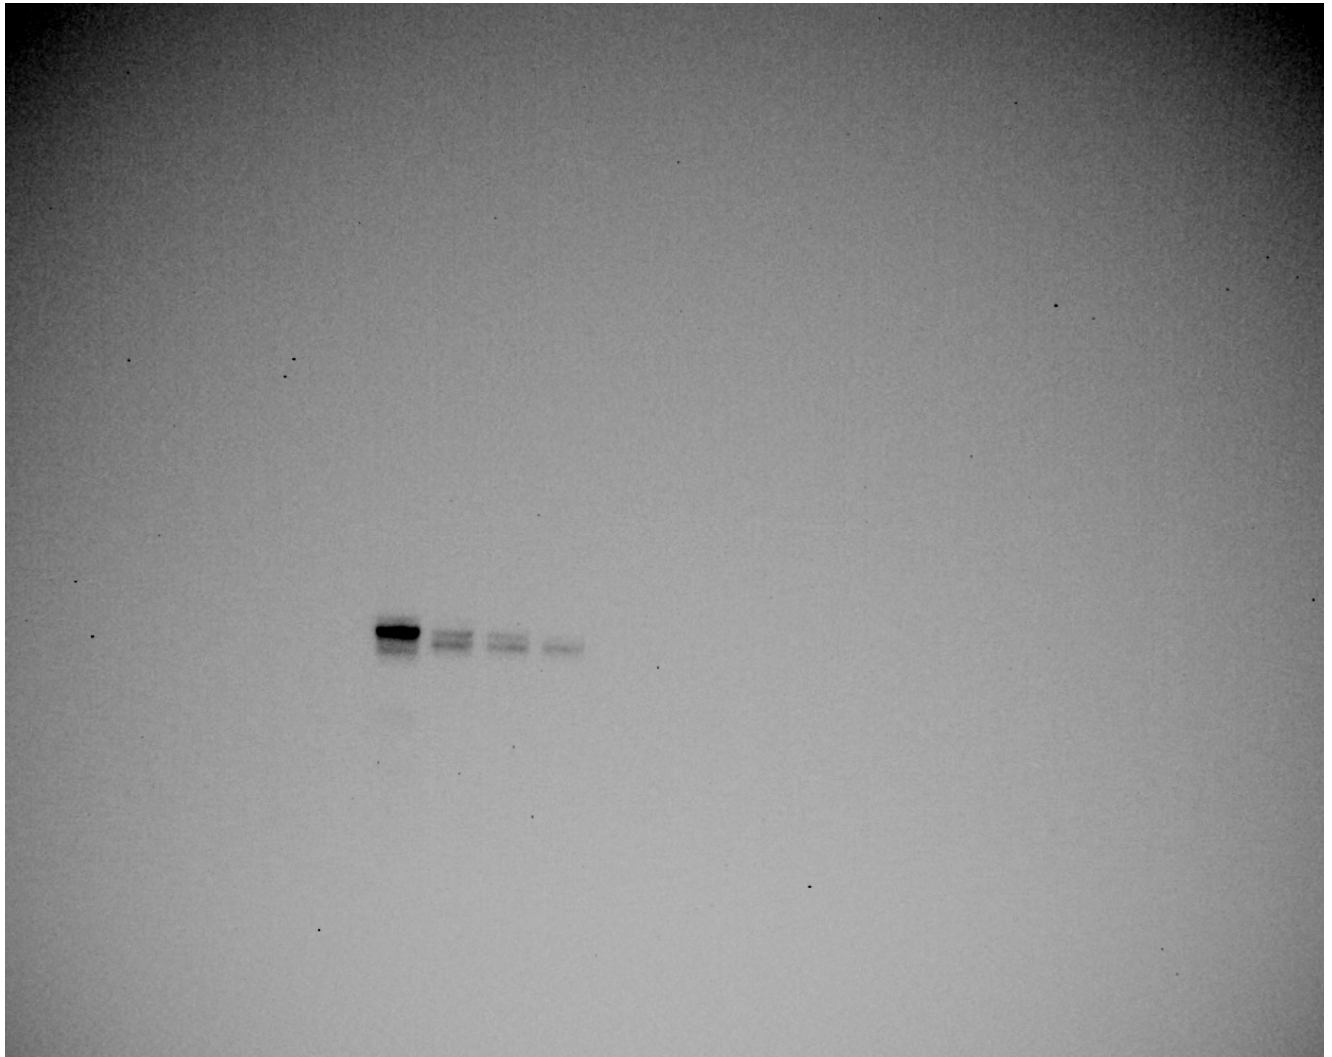

Supplement: supp [file elife-94201-supp-v1.zip]

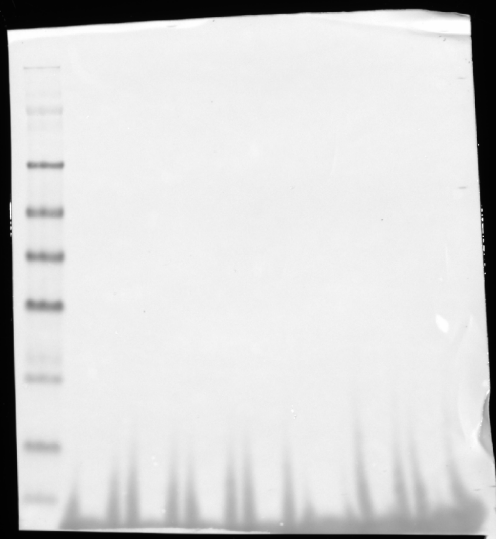

Supplement: supp [file elife-94201-supp-v1.zip]

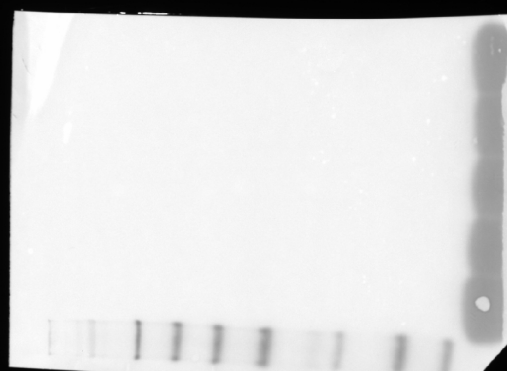

Supplement: supp [file elife-94201-supp-v1.zip]

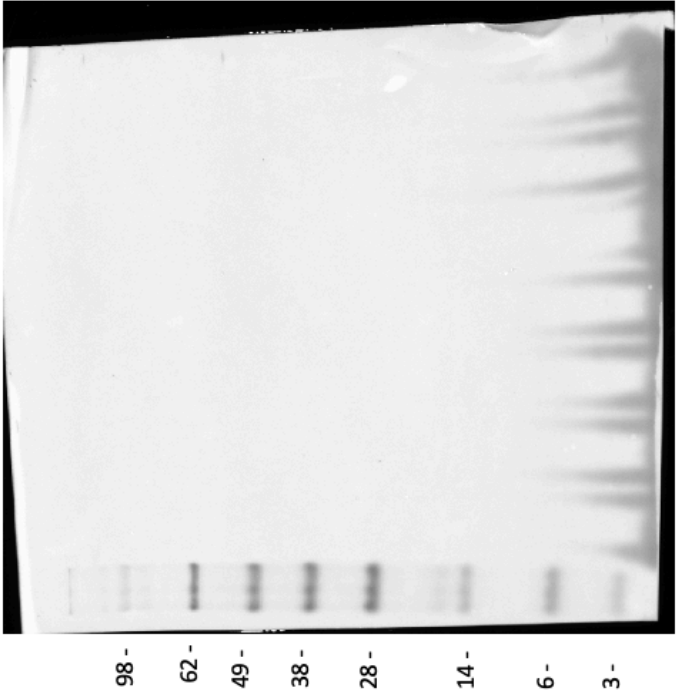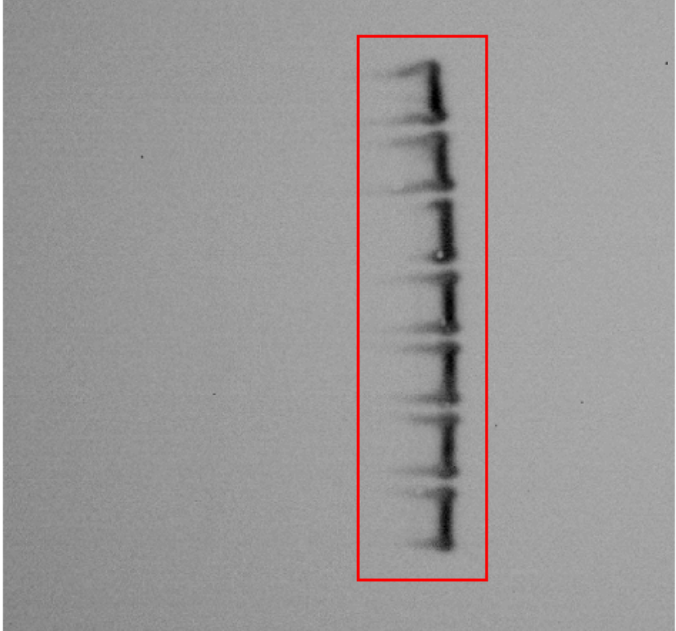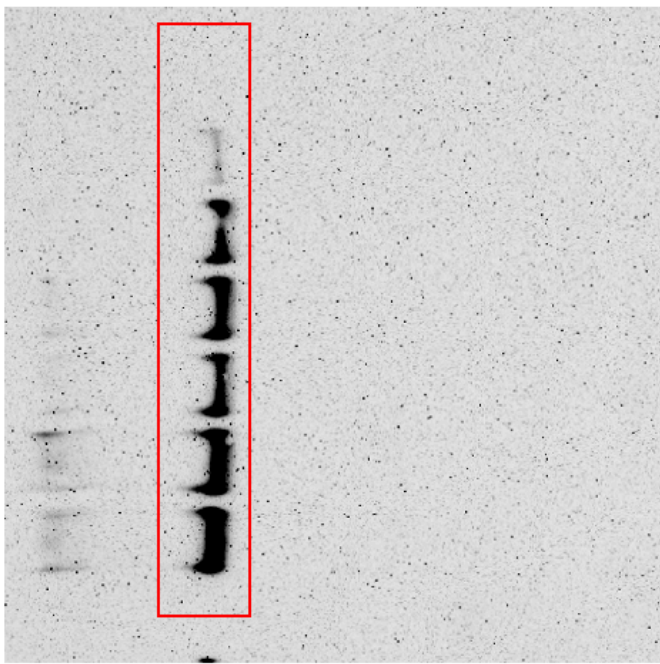

H3

LMBD3

Supplement: supp [file elife-94201-supp-v1.zip]

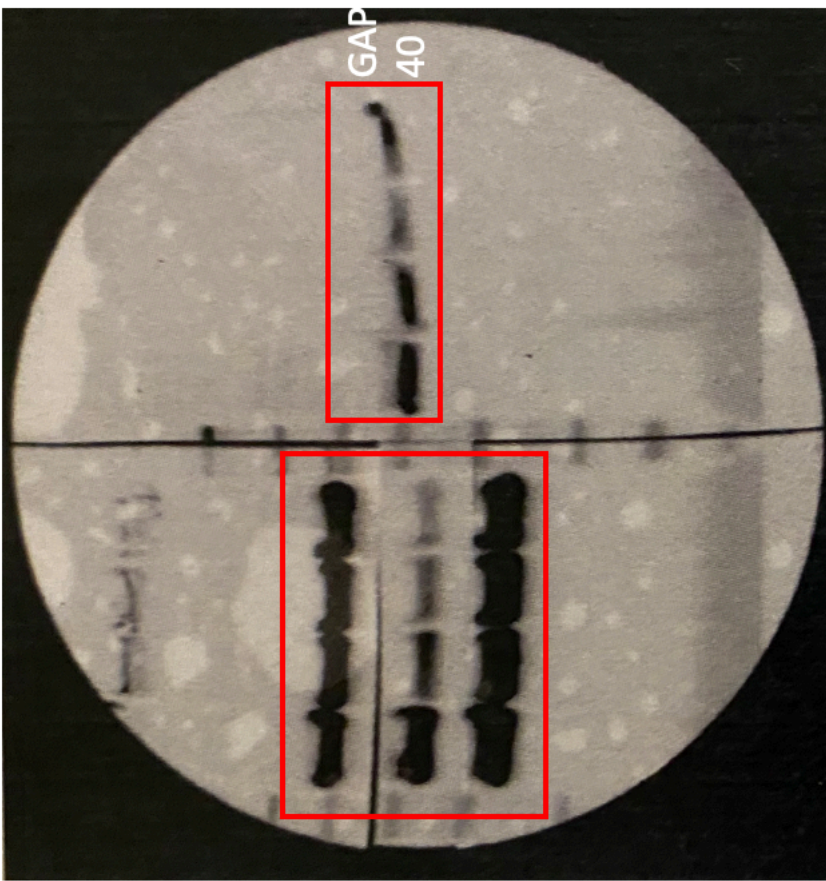

Tom40  
Sag1  
PRF

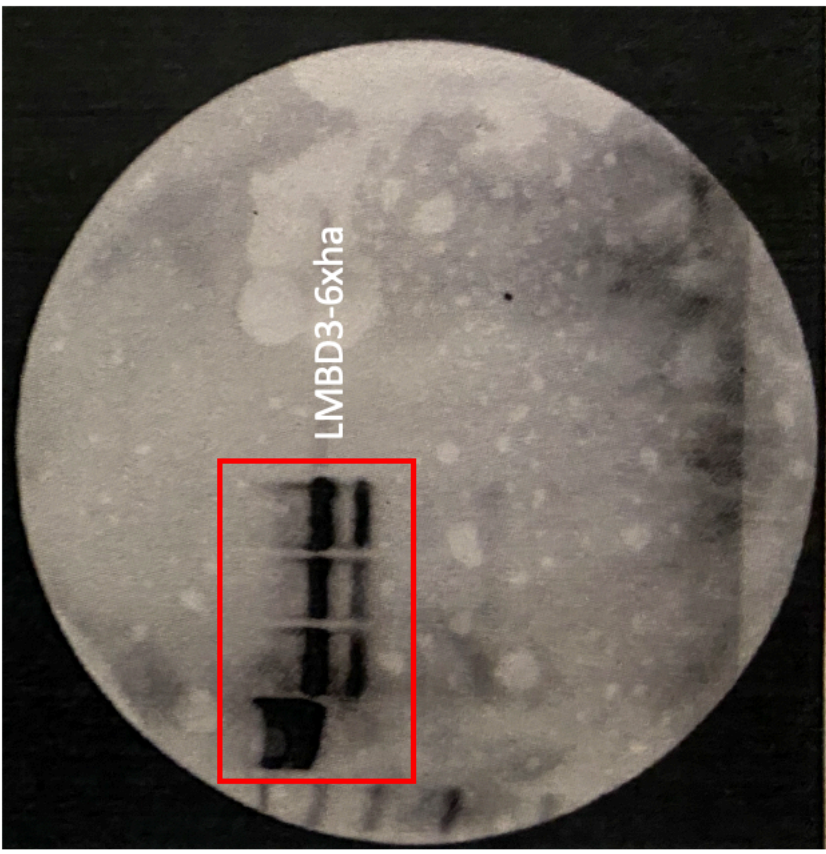

LMBD3-6xha

Supplement: supp [file elife-94201-supp-v1.zip]

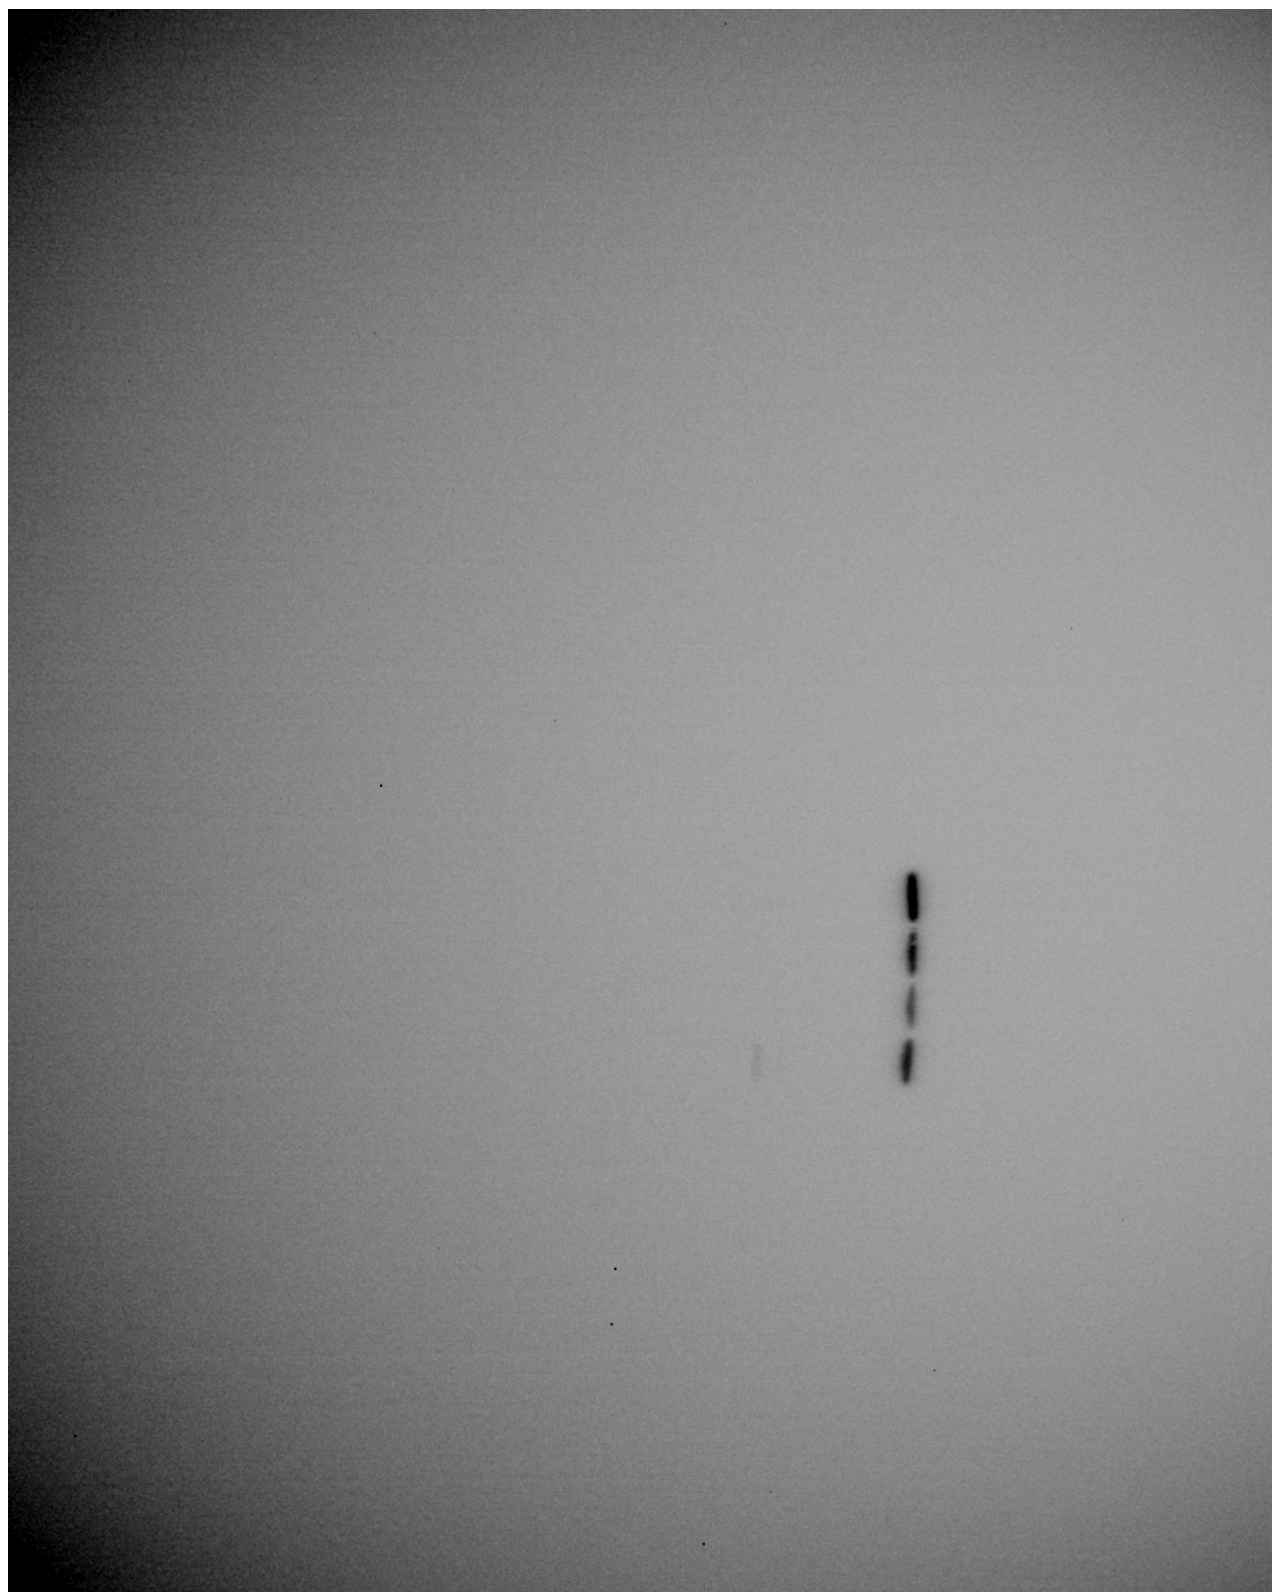

Supplement: supp [file elife-94201-supp-v1.zip]
